# Supplementary material
Source: PubMed Central journal article supplement (PMC9640164)
Supplement: mmc1.pdf [file mmc1.pdf]

# Novel ciprofloxacin and norfloxacin-tetrazole hybrids as potential antibacterial and antiviral agents: targeting *S. aureus* topoisomerase and SARS-CoV-2-MPro

Jaime Cardoso-Ortiz,<sup>a</sup> Socorro Leyva-Ramos,<sup>b\*</sup> Kim M. Baines,<sup>c</sup> Cesar Fernando Azael Gómez-Durán,<sup>b</sup> Hiram Hernández-López,<sup>a</sup> Francisco José Palacios-Can,<sup>d</sup> José Antonio Valcarcel-Gamiño,<sup>d</sup> Mario Alberto Leyva-Peralta,<sup>e</sup> Rodrigo Said Razo-Hernández<sup>d\*</sup>

<sup>a</sup>Unidad Académica de Ciencias Químicas, Universidad Autónoma de Zacatecas, Zacatecas 98160, México.

<sup>b</sup>Facultad de Ciencias Químicas, Universidad Autónoma de San Luis Potosí, San Luis Potosí 78210, México.

<sup>c</sup>Department of Chemistry, University of Western Ontario, London, Ontario, N6A 5B7, Canada.

<sup>d</sup>Centro de Investigación en Dinámica Celular, Universidad Autónoma del Estado de Morelos, Cuernavaca, Morelos 62209, México.

<sup>e</sup>Departamento de Ciencias Químico-Biológicas y Agropecuarias, Universidad de Sonora, H. Caborca, Sonora 83621, México.

## Corresponding author.

Socorro Leyva-Ramos, Tel.: +52 444 826 2300 Ext. 6476. e-mail: [sleyva@uaslp.mx](mailto:sleyva@uaslp.mx)

Rodrigo Said Razo-Hernández, Tel.: +52 777 329 7020 Ext. 3276. e-mail: [rodrigo.razo@uaem.mx](mailto:rodrigo.razo@uaem.mx)

## Contents

|                                                                                                        |           |
|--------------------------------------------------------------------------------------------------------|-----------|
| <b><i>In silico calculations</i>.....</b>                                                              | <b>2</b>  |
| <b><i>Infrared (FTIR-ATR) Spectroscopy Spectrum</i> .....</b>                                          | <b>15</b> |
| <b><sup>1</sup>H Resonance Magnetic Nuclear Spectroscopy Spectrum .....</b>                            | <b>19</b> |
| <b><sup>13</sup>C Resonance Magnetic Nuclear Spectroscopy Spectrum .....</b>                           | <b>23</b> |
| <b><sup>19</sup>F Resonance Magnetic Nuclear Spectroscopy Spectrum .....</b>                           | <b>27</b> |
| <b><i>Homonuclear Correlation Spectroscopy <sup>1</sup>H RMN (COSY) Spectrum</i> .....</b>             | <b>31</b> |
| <b><i>Heteronuclear Single-Quantum Correlation (HSQC) Spectroscopy Spectrum</i>.....</b>               | <b>35</b> |
| <b><i>Heteronuclear Multiple-Bond Correlation (HMBC) Spectroscopy Spectrum</i> .....</b>               | <b>38</b> |
| <b><i>Electron-Ionization (EI-MS) and High-Resolution Mass Spectroscopy (HR-MS) Spectrum</i> .....</b> | <b>42</b> |

*In silico* calculations

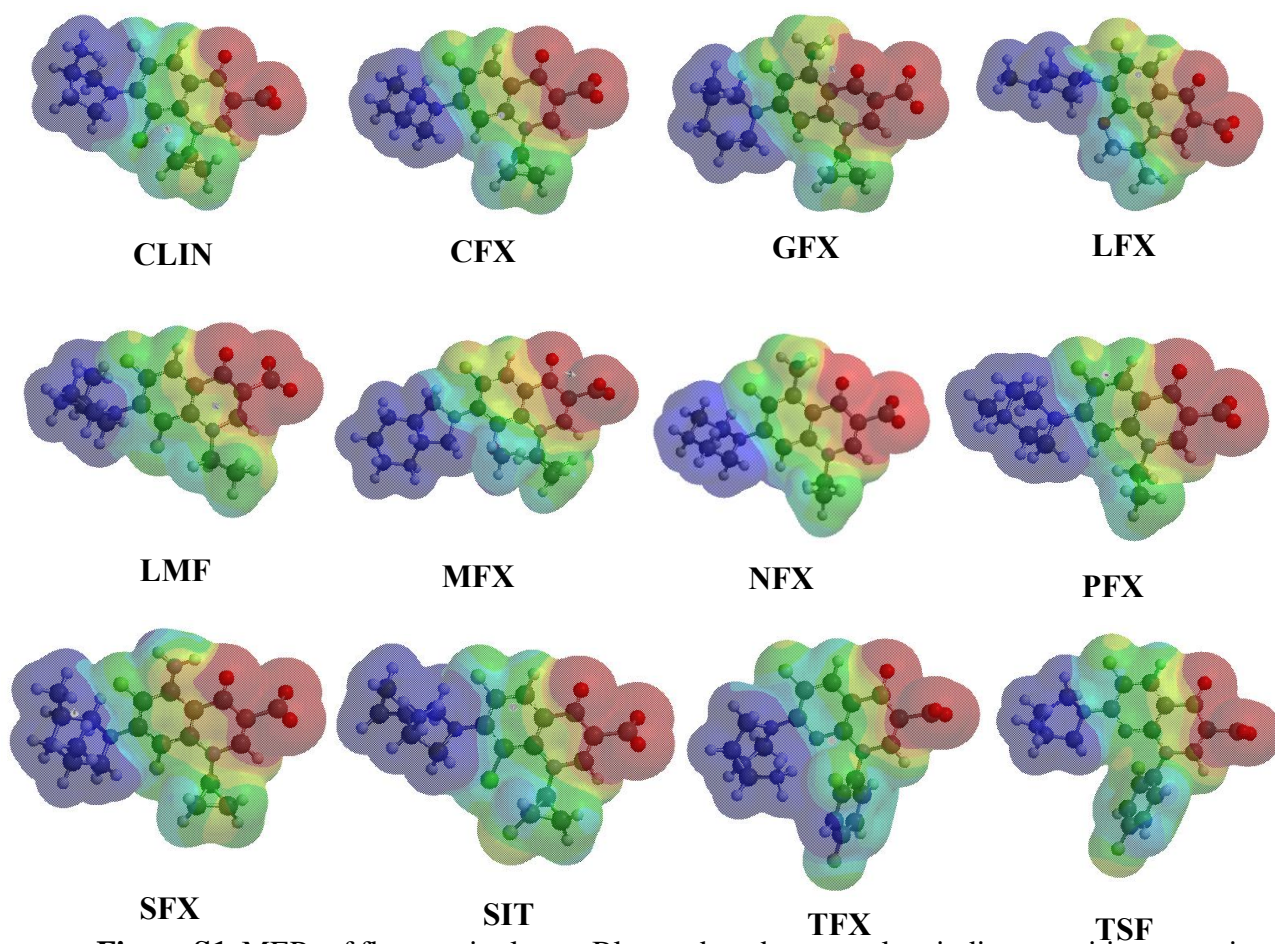

**Figure S1.** MEPs of fluoroquinolones. Blue, red, and green colors indicate positive, negative, and neutral MEP values zones, respectively.

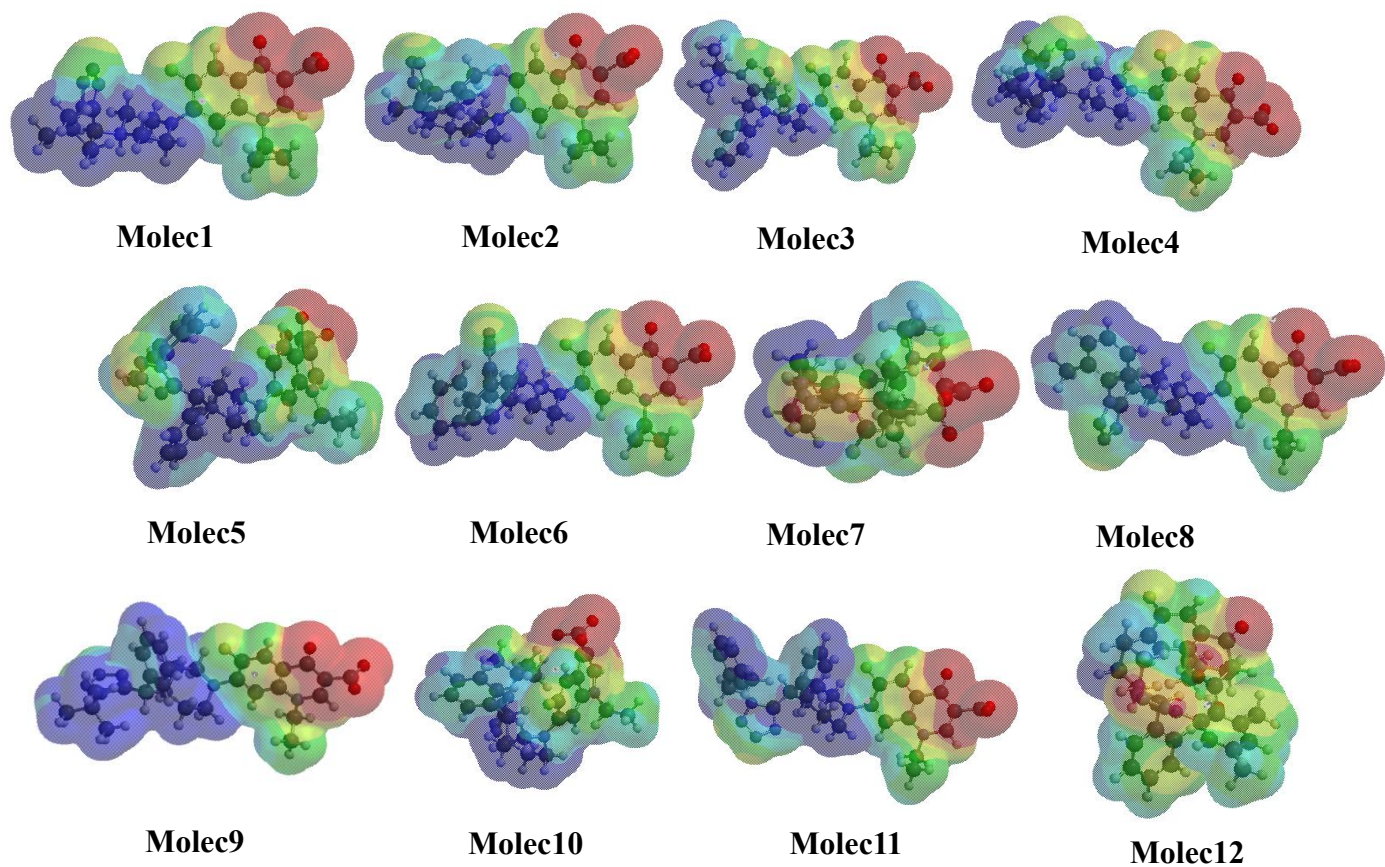

**Figure S2.** MEPs of synthesized fluoroquinolones. Blue, red, and green colors indicate positive, negative, and neutral MEP values zones, respectively.

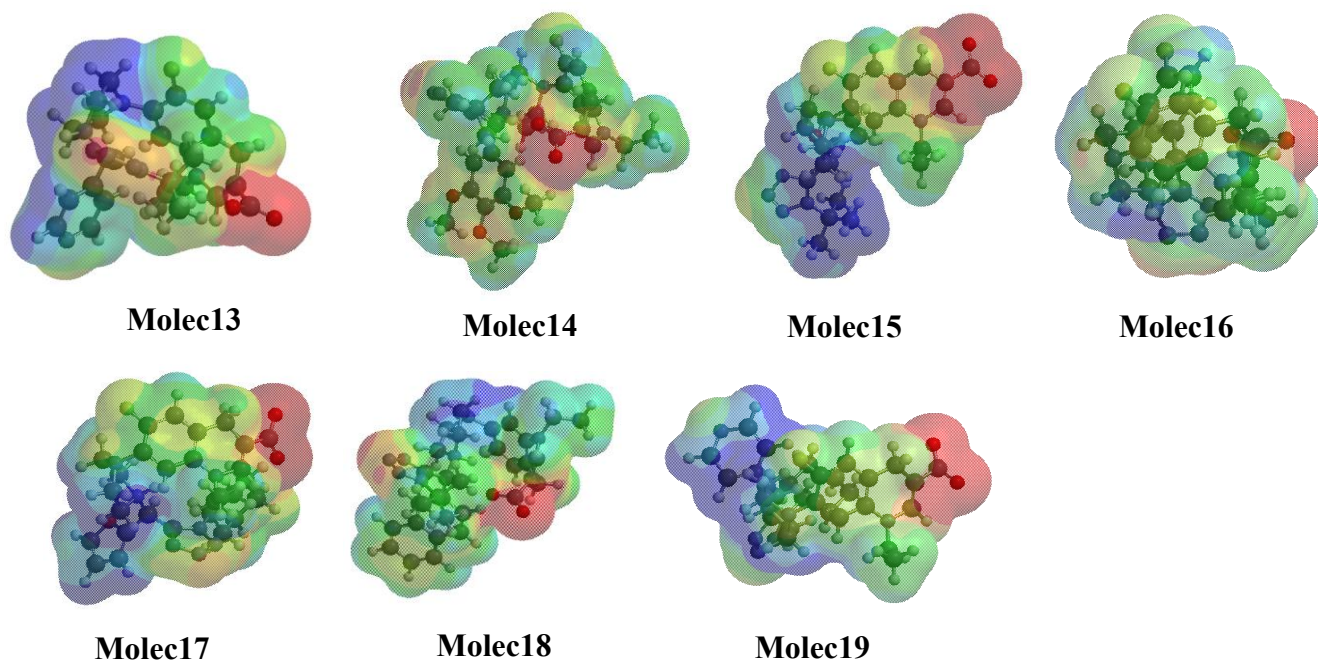

**Figure S3.** MEPs of fluoroquinolones synthesized by Chauhan et al. blue, red, and green colors indicate positive, negative, and neutral MEP values zones, respectively.

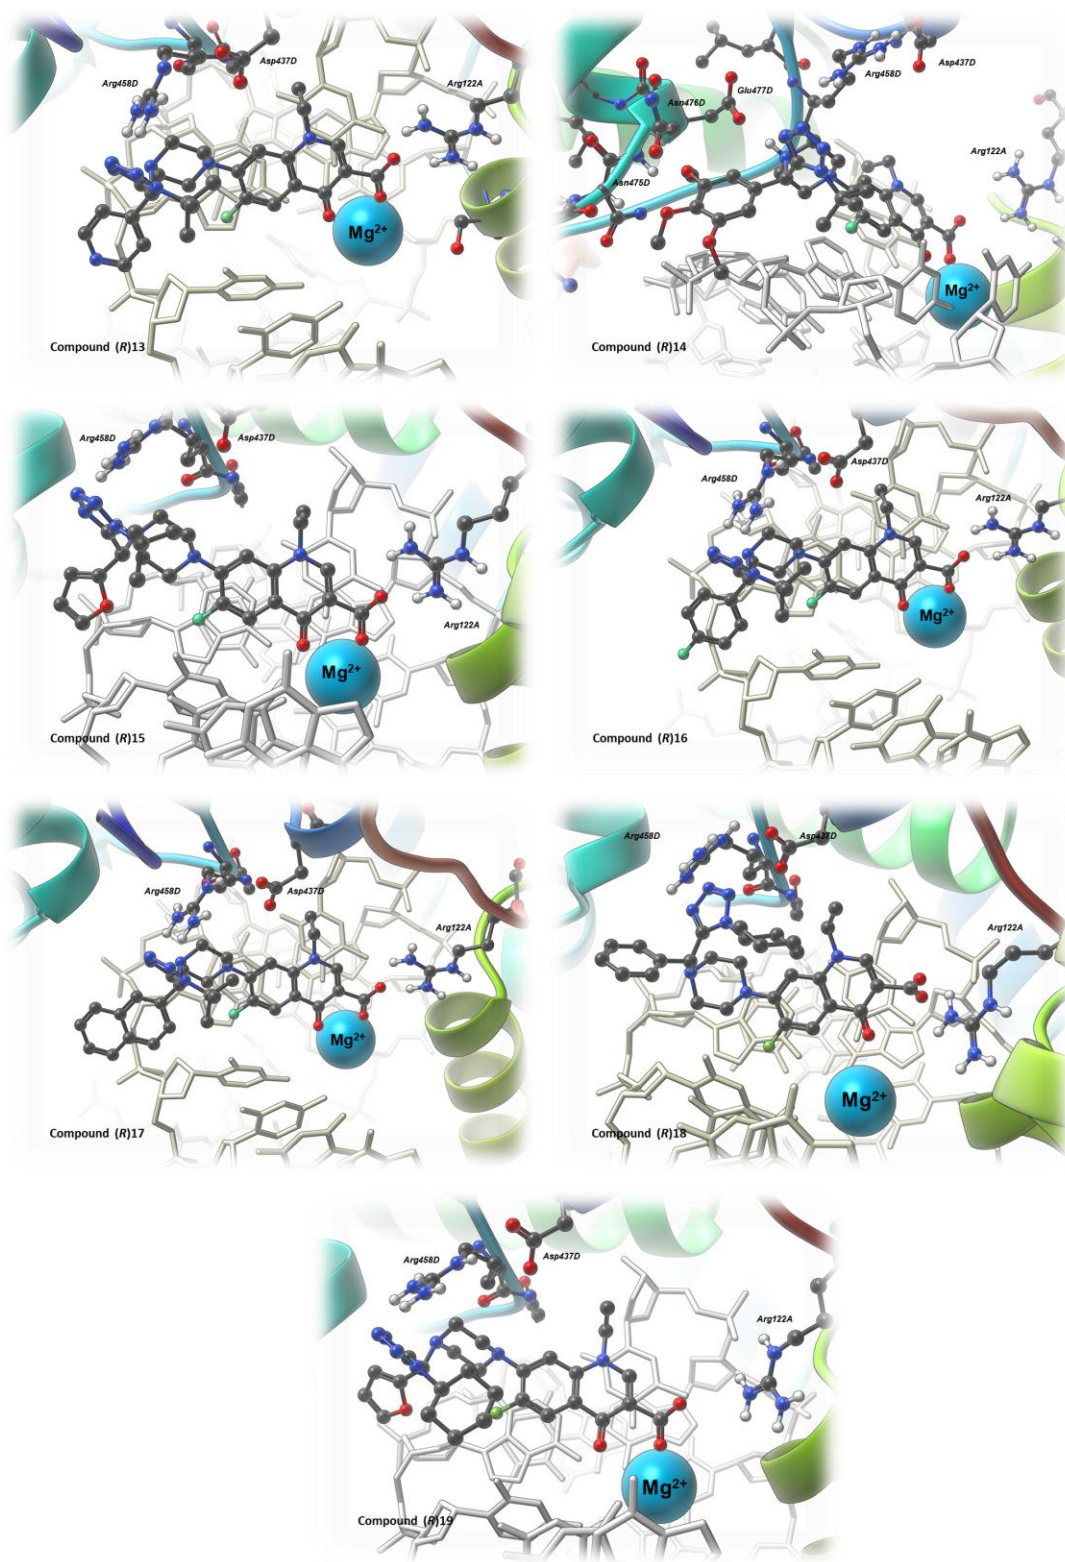

**Figure S4.** 3D structure representation of the complex formed by the fluoroquinolone-DNA-gyrase for compounds 13 to 19, only for the (R) isomers.

Table S1. MolDock Score, LE, torsions and HBond energy values (kcal/mol) of the docking experiments of molecules **1-12** and several known fluoroquinolones. Experimental MIC value is also displayed.

| <b>Compounds</b> | <b>Moldock Score</b> | <b>LE</b> | <b>HBond</b> | <b>Torsions</b> | <b>MIC (<math>\mu\text{g/mL}</math>)</b> |
|------------------|----------------------|-----------|--------------|-----------------|------------------------------------------|
| <b>1</b>         | -255.09              | -7.50     | -16.11       | 6               | --                                       |
| <b>2</b>         | -182.03              | -4.79     | -6.89        | 6               | --                                       |
| <b>3</b>         | -202.12              | -5.05     | -8.69        | 7               | --                                       |
| <b>4</b>         | -253.94              | -6.35     | -16.39       | 7               | --                                       |
| <b>5</b>         | -255.56              | -5.81     | -7.58        | 7               | --                                       |
| <b>6</b>         | -245.68              | -5.58     | -9.03        | 7               | --                                       |
| <b>7</b>         | -244.44              | -7.41     | -16.17       | 6               | --                                       |
| <b>8</b>         | -229.45              | -6.20     | -14.65       | 6               | --                                       |
| <b>9</b>         | -212.93              | -5.46     | -5.42        | 7               | --                                       |
| <b>10</b>        | -251.86              | -6.46     | -15.32       | 7               | --                                       |
| <b>11</b>        | -182.36              | -4.24     | -2.83        | 7               | --                                       |
| <b>12</b>        | -258.04              | -6.00     | -10.66       | 7               | --                                       |
| <b>CFX</b>       | -151.16              | -6.30     | -4.14        | 3               | 0.5                                      |
| <b>MXF</b>       | -198.77              | -6.85     | -4.20        | 4               | 0.6                                      |
| <b>CLIN</b>      | -222.39              | -8.90     | -4.53        | 3               | 0.125                                    |
| <b>GFX</b>       | -205.29              | -7.90     | -4.35        | 3               | 0.25                                     |
| <b>LFX</b>       | -189.19              | -7.28     | -4.73        | 2               | 0.125                                    |
| <b>LMF</b>       | -199.73              | -7.99     | 0.00         | 3               | 0.2                                      |
| <b>NFX</b>       | -192.34              | -8.36     | -4.54        | 3               | 0.39                                     |
| <b>PFX</b>       | -177.99              | -7.42     | -4.26        | 3               | 0.5                                      |
| <b>SIT</b>       | -228.22              | -8.15     | -4.17        | 3               | 0.5                                      |
| <b>SFX</b>       | -221.08              | -7.62     | -4.29        | 3               | 0.125                                    |
| <b>TSF</b>       | -245.38              | -8.46     | 0.00         | 3               | 0.1                                      |
| <b>TFX</b>       | -200.56              | -6.69     | 0.00         | 3               | 0.6                                      |

Table S2. Calculated total ( $E_{\text{Total}}$ ) and electrostatic energy ( $E_{\text{Elec}}$ ) for the most contributing oxygen atom to the interaction energy of the complex in each compound. Energies in kcal/mol.

| <b>Compound</b> | $E_{\text{Total}}$ (O1) | $E_{\text{Elec}}$ (O1) | $E_{\text{Elec}}$ ( $\text{Mg}^{2+}$ ) |
|-----------------|-------------------------|------------------------|----------------------------------------|
| <b>1</b>        | -20.98                  | -25.79                 | -33.49                                 |
| <b>2</b>        | -9.85                   | -6.13                  | -5.90                                  |
| <b>3</b>        | -14.68                  | -19.91                 | -18.84                                 |
| <b>4</b>        | -21.2                   | -25.70                 | -30.74                                 |
| <b>5</b>        | -9.62                   | 2.01                   | -5.02                                  |
| <b>6</b>        | -21.62                  | -25.96                 | -28.93                                 |
| <b>7</b>        | -21.26                  | -25.97                 | -33.36                                 |
| <b>8</b>        | -16.33                  | -19.99                 | -18.23                                 |
| <b>9</b>        | -7.70                   | 2.48                   | -1.44                                  |
| <b>10</b>       | -20.89                  | -25.69                 | -32.52                                 |
| <b>11</b>       | -19.72                  | -25.53                 | -37.24                                 |
| <b>12</b>       | -20.89                  | -25.72                 | -32.50                                 |

Table S3. MolDock Score, LE, Total HBond energy values (kcal/mol) and number of torsions for the docking experiments for both enantiomers of molecules **13-19**.

| <b>Compounds</b> | <b>Moldock Score</b> | <b>LE</b> | <b>Total HBond</b> | <b>Torsions</b> |
|------------------|----------------------|-----------|--------------------|-----------------|
| <b>13R</b>       | -288.46              | -7.40     | -15.92             | 7               |
| <b>13S</b>       | -291.40              | -7.47     | -1.53              | 7               |
| <b>14R</b>       | -295.77              | -6.57     | -7.31              | 10              |
| <b>14S</b>       | -273.46              | -6.08     | -7.38              | 10              |
| <b>15R</b>       | -268.76              | -7.07     | -15.99             | 7               |
| <b>15S</b>       | -259.21              | -6.65     | -4.24              | 7               |
| <b>16R</b>       | -255.32              | -6.38     | -16.47             | 7               |
| <b>16S</b>       | -224.71              | -5.62     | -3.10              | 7               |
| <b>17R</b>       | -260.05              | -6.05     | -16.53             | 7               |
| <b>17S</b>       | -283.56              | -6.59     | -1.28              | 7               |
| <b>18R</b>       | -256.60              | -6.26     | -6.90              | 7               |
| <b>18S</b>       | -214.71              | -5.24     | -4.31              | 7               |
| <b>19R</b>       | -220.73              | -5.52     | -8.12              | 7               |
| <b>19S</b>       | -222.73              | -5.43     | -0.83              | 7               |

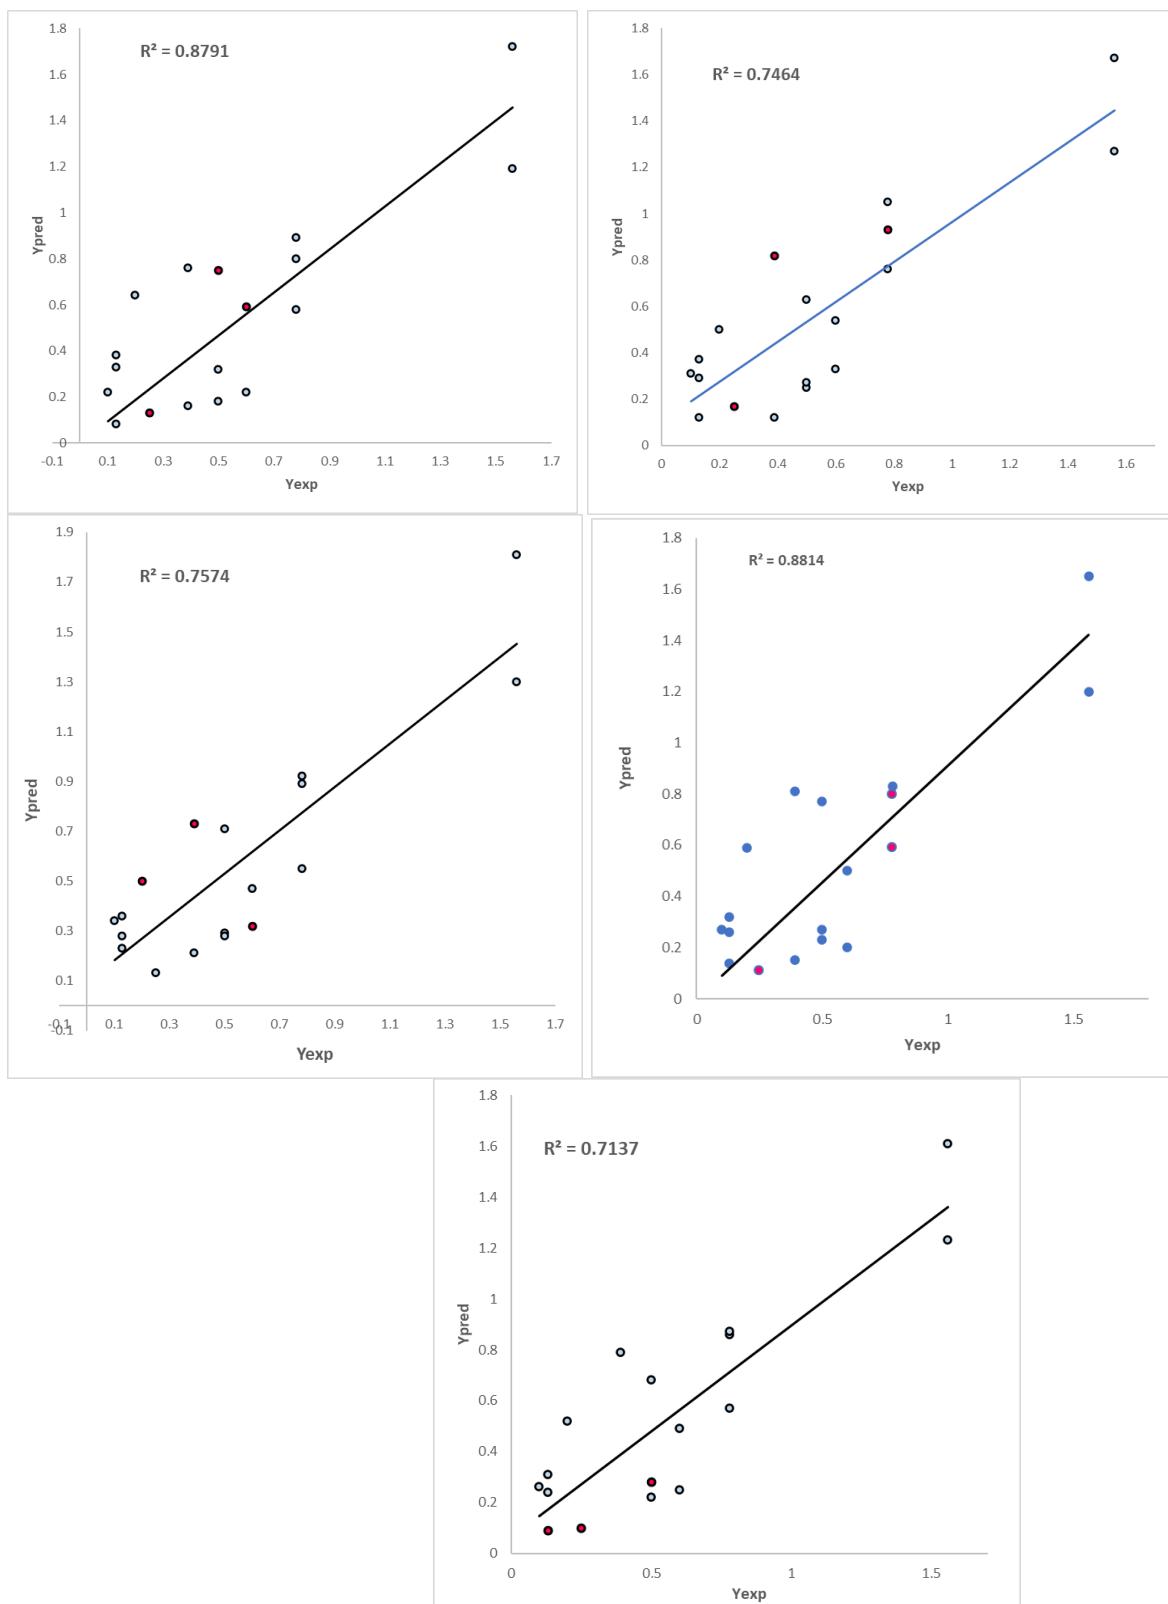

**Figure S5.** The linear correlation of  $Y_{pred}$  vs  $Y_{exp}$  is displayed. The  $R^2$  value is also indicated. Blue colored points represent the molecules of the training set and red colored points represent the external set.

Table S4. PSA and Volume values of known fluoroquinolones and new derivatives

| Compounds | PSA (Å <sup>2</sup> ) | Volume (Å <sup>3</sup> ) | MIC (µg/mL) |
|-----------|-----------------------|--------------------------|-------------|
| TSF       | 80.39                 | 362.09                   | 0.1         |
| CLIN      | 73.64                 | 333.57                   | 0.125       |
| CFX       | 62.95                 | 323.22                   | 0.5         |
| GFX       | 60.77                 | 357.65                   | 0.25        |
| LFX       | 59.42                 | 345.20                   | 0.125       |
| MFX       | 66.72                 | 391.09                   | 0.6         |
| LMF       | 62.74                 | 334.40                   | 0.2         |
| NFX       | 60.68                 | 329.12                   | 0.39        |
| PFX       | 52.64                 | 331.71                   | 0.5         |
| SFX       | 80.64                 | 371.82                   | 0.125       |
| SIT       | 72.75                 | 368.11                   | 0.5         |
| TFX       | 70.86                 | 372.96                   | 0.6         |
| 1         | 88.73                 | 461.16                   | --          |
| 2         | 90.21                 | 508.09                   | --          |
| Molec 3   | 87.48                 | 543.81                   | --          |
| Molec 4   | 89.08                 | 543.40                   | --          |
| Molec 5   | 92.32                 | 590.12                   | --          |
| Molec 6   | 88.37                 | 556.59                   | --          |
| Molec 7   | 81.82                 | 445.68                   | --          |
| Molec 8   | 90.00                 | 498.83                   | --          |
| Molec 9   | 88.48                 | 532.24                   | --          |
| Molec 10  | 83.26                 | 527.31                   | --          |
| Molec 11  | 89.03                 | 580.70                   | --          |
| Molec 12  | 78.64                 | 576.26                   | --          |

Table S5. Interaction energy values (kcal/mol) of the co-crystallized inhibitors with specific aa of CoV-2-Mpro of crystal **6lu7**.

| aa            | 1     | 2      | 3     | 4      | 5      | 6      | 7     | 8     | 9      | 10     | 11     | 12     |
|---------------|-------|--------|-------|--------|--------|--------|-------|-------|--------|--------|--------|--------|
| <b>Leu27</b>  | -3.24 | -4.57  | -1.54 | -4.75  | -1.59  | -1.99  | -4.02 | -9.76 | -3.47  | -4.81  | --     | -5.75  |
| <b>His41</b>  | -5.44 | -14.45 | -9.37 | -13.88 | -13.60 | -11.99 | -5.41 | -8.27 | -14.41 | -13.47 | -12.49 | -17.89 |
| <b>Met49</b>  | -4.39 | -2.66  | -4.66 | -9.831 | 8.13   | -11.62 | -3.70 | -2.97 | -6.87  | -8.04  | -4.71  | 4.95   |
| <b>Phe140</b> | --    | -1.76  | --    | --     | --     | -2.24  | --    | --    | --     | --     | -2.65  | --     |
| <b>Leu141</b> | -2.36 | -8.23  | -2.06 | --     | --     | -8.17  | -2.66 | -1.80 | -1.66  | -0.50  | -4.72  | -1.95  |



|               |         |         |         |         |         |         |         |         |         |         |         |         |
|---------------|---------|---------|---------|---------|---------|---------|---------|---------|---------|---------|---------|---------|
| <b>Asn142</b> | -11.79  | -11.86  | -16.83  | -2.48   | -11.16  | -7.03   | -11.11  | -14.31  | -8.71   | -14.51  | -8.02   | -16.66  |
| <b>Gly143</b> | -11.95  | -9.87   | -7.86   | -3.58   | -5.94   | -7.57   | -11.28  | -10.44  | -9.35   | -8.19   | -2.61   | -9.11   |
| <b>Ser144</b> | -7.84   | -10.00  | -9.44   | -1.26   | -0.63   | -10.35  | -4.90   | -7.99   | -5.06   | -3.05   | -4.58   | -3.90   |
| <b>Cys145</b> | -17     | -7.63   | -22.90  | -7.02   | -7.18   | -14.73  | -14.75  | -15.99  | -20.87  | -5.75   | -5.71   | -13.83  |
| <b>His164</b> | -3.69   | -8.47   | -6.36   | -4.33   | -4.49   | -5.59   | -3.76   | -4.65   | -6.87   | -4.53   | -8.96   | -6.11   |
| <b>Met165</b> | -20.13  | -20.87  | -20.59  | -21.20  | -14.10  | -28.20  | -20.75  | -19.31  | -20.19  | -19.40  | -21.23  | -17.11  |
| <b>Glu166</b> | -12.89  | -11.66  | -11.13  | -8.10   | -10.12  | -15.52  | -8.73   | -10.55  | -9.10   | -9.89   | -11.99  | -8.10   |
| <b>Leu167</b> | -10.97  | -7.98   | -8.75   | -8.66   | -6.03   | -8.35   | -10.76  | -10.68  | -7.50   | -6.49   | -3.30   | -8.74   |
| <b>Pro168</b> | -8.63   | -6.60   | -6.16   | -6.51   | -2.24   | -5.69   | -9.06   | -8.91   | -5.33   | -2.25   | -8.74   | -4.47   |
| <b>Arg188</b> | -3.85   | -1.66   | -1.19   | -4.28   | 2.76    | -1.40   | -1.35   | -1.10   | -1.98   | -0.98   | -6.94   | -3.68   |
| <b>Gln189</b> | -29.14  | -26.18  | -27.94  | -29.12  | -26.239 | -31.838 | -29.55  | -27.40  | -26.92  | -25.93  | -41.86  | 3.84872 |
| <b>Gln192</b> | -11.02  | -10.47  | -12.06  | -15.27  | -6.70   | -13.83  | -10.93  | -12.43  | -15.52  | -10.09  | -2.47   | -2.10   |
| <b>MDSG</b>   | -157.84 | -167.83 | -153.89 | -147.62 | -112.29 | -194.52 | -151.07 | -159.54 | -161.40 | -147.79 | -158.87 | -114.58 |
| <b>Hbtot</b>  | -29.03  | -19.44  | -29.31  | -3.51   | -3.86   | -26     | -24.84  | -25.65  | -17.77  | -7.55   | -3.16   | -17.52  |
| <b>LE</b>     | -4.64   | -4.42   | -3.84   | -3.69   | -2.552  | -4.42   | -4.58   | -4.31   | -4.14   | -3.79   | -3.50   | -2.67   |

Table S6. Interaction energy values (kcal/mol) of the co-crystallized inhibitors with specific aa of CoV-2-Mpro of crystal **710d**.

| <b>aa</b>     | <b>1</b> | <b>2</b> | <b>3</b> | <b>4</b> | <b>5</b> | <b>6</b> | <b>7</b> | <b>8</b> | <b>9</b> | <b>10</b> | <b>11</b> | <b>12</b> |
|---------------|----------|----------|----------|----------|----------|----------|----------|----------|----------|-----------|-----------|-----------|
| <b>Leu27</b>  | -1.61    | -0.83    | -4.53    | 2.13     | -1.00    | -5.91    | -8.93    | -2.40    | 0.56     | 2.04      | -0.45     | -10.76    |
| <b>His41</b>  | -10.43   | -6.04    | -18.56   | -18.18   | -15.63   | -13.92   | -13.36   | -15.46   | -15.71   | -12.69    | -12.84    | -10.82    |
| <b>Met49</b>  | --       | -3.92    | -6.17    | -0.31    | -2.78    | -0.72    | -6.00    | -1.62    | -5.02    | --        | -1.47     | -3.45     |
| <b>Phe140</b> | -3.77    | -1.99    | -3.69    | -2.04    | -2.35    | -0.30    | --       | --       | --       | -4.34     | 2.26      | --        |
| <b>Leu141</b> | -8.70    | -6.16    | -12.19   | -13.43   | -6.45    | -2.59    | --       | -1.45    | --       | -12.53    | -14.05    | -2.66     |
| <b>Asn142</b> | -16.81   | -17.98   | -19.26   | -25.50   | -15.12   | -15.86   | -2.96    | -19.35   | -7.29    | -17.65    | -12.49    | -25.31    |
| <b>Gly143</b> | -8.26    | -1.08    | -4.82    | -4.74    | -10.12   | -11.17   | -3.72    | -12.27   | -4.33    | -6.66     | -7.25     | -9.02     |
| <b>Ser144</b> | -5.50    | -6.97    | -4.32    | -4.72    | -3.35    | -3.88    | -1.09    | -0.57    | -0.44    | -4.92     | -4.28     | -5.17     |
| <b>Cys145</b> | -6.85    | -15.16   | -6.02    | -9.90    | -0.73    | -9.04    | -3.70    | -7.07    | -16.04   | -6.22     | -7.20     | -16.17    |
| <b>His164</b> | -2.25    | -5.15    | -3.33    | -2.80    | -7.21    | -4.60    | -0.40    | -2.05    | -4.66    | -2.96     | -2.42     | -4.03     |
| <b>Met165</b> | -7.76    | -11.21   | -6.64    | -1.58    | -16.66   | -11.66   | --       | -11.37   | -14.85   | -3.52     | -2.80     | -10.11    |
| <b>Glu166</b> | -12.34   | -19.30   | -21.94   | -13.56   | -30.24   | -25.42   | --       | -21.25   | -8.77    | -14.11    | -14.32    | -27.25    |
| <b>Leu167</b> | -0.33    | --       | --       | --       | -9.18    | -11.51   | --       | -9.21    | -4.06    | --        | --        | -8.80     |
| <b>Pro168</b> | --       | --       | --       | --       | -20.95   | -19.03   | --       | -19.02   | -0.63    | --        | --        | -21.08    |
| <b>Arg188</b> | --       | --       | --       | --       | -2.26    | --       | --       | -0.51    | -5.91    | --        | --        | -0.42     |
| <b>Gln189</b> | -0.39    | --       | --       | --       | -14.96   | -3.75    | -20.06   | -4.14    | -15.42   | --        | -1.08     | -8.28     |
| <b>Gln192</b> | --       | --       | --       | --       | -2.11    | --       | --       | --       | -11.41   | --        | --        | --        |
| <b>MDSG</b>   | -101.21  | -153.73  | -152.49  | -134.10  | -164.55  | -142.63  | -91.01   | -128.33  | -131.10  | -140.29   | -153.36   | -171.20   |
| <b>HBtot</b>  | -3.65    | -15.81   | -2.95    | -2.38    | -11.05   | -10.65   | -1.30    | -10.13   | -13.07   | -4.59     | -12.13    | -30.29    |
| <b>LE</b>     | -2.98    | -4.05    | -3.81    | -3.35    | -3.74    | -3.24    | -2.76    | -3.47    | -3.36    | -3.60     | -3.57     | -3.98     |

Table S7. Interaction energy values (kcal/mol) of the co-crystallized inhibitors with specific aa of CoV-2-Mpro of crystal **6m2n**.

| aa            | 1       | 2       | 3       | 4       | 5       | 6       | 7       | 8       | 9       | 10      | 11      | 12      |
|---------------|---------|---------|---------|---------|---------|---------|---------|---------|---------|---------|---------|---------|
| <b>Leu27</b>  | -4.53   | -0.30   | --      | -0.56   | -1.79   | --      | -4.78   | -4.91   | -1.19   | -6.74   | -0.72   | --      |
| <b>His41</b>  | -8.17   | -2.21   | -20.56  | -26.45  | -6.13   | -23.59  | -6.99   | -5.41   | -6.04   | -11.51  | 2.81    | -19.50  |
| <b>Met49</b>  | -4.60   | -1.37   | -6.85   | -15.36  | -4.08   | -19.85  | -1.36   | -0.58   | -1.83   | -8.76   | -0.80   | -8.55   |
| <b>Phe140</b> | --      | -7.52   | --      | --      | -5.72   | --      | --      | --      | -6.15   | --      | -4.65   | --      |
| <b>Leu141</b> | -2.01   | -9.72   | --      | --      | -5.53   | --      | -1.67   | -2.23   | -5.26   | --      | -4.89   | --      |
| <b>Asn142</b> | -14.60  | -17.10  | -12.85  | -2.93   | -25.52  | -0.40   | -11.49  | -15.98  | -16.38  | -15.13  | -13.94  | -8.69   |
| <b>Gly143</b> | -7.21   | -10.21  | -4.33   | --      | -6.28   | --      | -8.84   | -12.45  | -4.29   | -7.51   | -1.77   | --      |
| <b>Ser144</b> | -6.10   | -8.18   | -0.38   | --      | -5.17   | --      | -4.38   | -6.88   | -6.25   | -0.70   | -2.93   | --      |
| <b>Cys145</b> | -20.28  | -9.37   | -7.75   | -6.13   | -15.54  | -4.53   | -20.78  | -15.00  | -16.20  | -8.49   | -4.79   | -7.76   |
| <b>His164</b> | -5.97   | -5.98   | -4.33   | 2.53    | 4.79    | -3.32   | -8.40   | -5.18   | -3.55   | -4.00   | -4.35   | -7.20   |
| <b>Met165</b> | -12.77  | -20.20  | -18.26  | -6.81   | -22.50  | -6.59   | -4.66   | -16.90  | -24.72  | -17.99  | -17.68  | -14.10  |
| <b>Glu166</b> | -7.45   | -23.63  | -8.49   | -3.79   | -22.53  | -8.12   | -12.70  | -14.84  | -27.09  | -9.08   | -22.67  | -16.63  |
| <b>Leu167</b> | -1.05   | -10.20  | -6.75   | -6.35   | -4.25   | -5.87   | -2.97   | -7.84   | -3.97   | -6.73   | -6.53   | -5.81   |
| <b>Pro168</b> | -6.45   | -17.74  | -4.95   | -14.34  | -6.13   | -15.43  | -11.09  | -12.54  | -7.58   | -5.09   | -18.41  | -15.92  |
| <b>Arg188</b> | -6.02   | -2.31   | --      | -7.96   | -1.13   | -13.06  | -4.67   | -2.33   | -1.06   | -2.20   | -4.18   | -7.65   |
| <b>Gln189</b> | -30.08  | -16.68  | -24.90  | -23.74  | -20.73  | -21.41  | -24.44  | -16.31  | -24.93  | -20.10  | -11.34  | -23.98  |
| <b>Gln192</b> | -15.14  | -12.33  | -16.31  | -16.71  | -7.63   | -16.71  | -13.69  | -14.08  | -10.45  | -14.78  | -9.81   | -12.63  |
| <b>MDSG</b>   | -139.07 | -185.44 | -158.75 | -136.26 | -167.24 | -165.05 | -134.34 | -155.64 | -116.50 | -159.44 | -133.13 | -156.30 |
| <b>HBtot</b>  | -26.87  | -20.03  | -7.05   | -10.05  | -16.46  | -9.59   | -22.16  | -15.10  | -16.01  | -12.36  | -2.74   | -8.26   |
| <b>LE</b>     | -4.09   | -4.88   | -3.97   | -3.41   | -3.80   | -3.75   | -4.07   | -4.21   | -2.99   | -4.09   | -3.10   | -3.63   |

Table S8. Interaction energy values (kcal/mol) of the co-crystallized inhibitors with specific aa of CoV-2-Mpro of crystal **6w63**.

| aa     | 1      | 2       | 3       | 4       | 5       | 6       | 7       | 8       | 9       | 10      | 11      | 12      |
|--------|--------|---------|---------|---------|---------|---------|---------|---------|---------|---------|---------|---------|
| Leu27  | --     | --      | --      | --      | -0.78   | -5.15   | -1.02   | --      | -4.05   | -0.35   | -0.52   | --      |
| His41  | -4.20  | -36.50  | -8.10   | -0.50   | -20.29  | -11.16  | -7.25   | -3.96   | -20.40  | --      | -1.82   | -4.85   |
| Met49  | --     | -10.40  | -7.67   | --      | -12.42  | -10.82  | -0.63   | --      | -7.14   | --      | -1.52   | -3.79   |
| Phe140 | -3.68  | -7.62   | -3.43   | -6.79   | -1.64   | --      | --      | -7.46   | --      | -4.97   | -1.45   | -3.00   |
| Leu141 | -5.04  | -11.76  | -6.75   | -5.51   | -4.76   | -1.46   | -1.00   | -9.89   | -0.64   | -5.83   | -11.97  | -9.61   |
| Asn142 | -19.79 | -21.15  | -28.46  | -25.06  | -14.93  | -14.94  | -8.80   | -19.45  | -10.25  | -22.04  | -28.37  | -21.70  |
| Gly143 | -9.44  | -2.22   | -10.11  | -12.64  | -5.71   | -13.25  | -3.31   | -10.63  | -6.21   | -12.50  | -13.94  | -8.88   |
| Ser144 | -13.37 | -3.85   | -7.97   | -7.62   | -4.04   | -0.94   | -0.31   | -6.14   | -1.25   | -12.35  | -10.57  | -4.05   |
| Cys145 | -15.39 | -5.20   | -17.76  | -14.86  | -7.02   | -12.28  | -10.64  | -11.45  | -13.31  | -15.64  | -14.05  | -9.30   |
| His164 | -5.23  | -5.66   | -5.33   | -3.97   | -7.04   | -2.20   | -4.61   | -2.27   | -3.90   | -3.80   | -4.09   | -2.58   |
| Met165 | -23.03 | -2.64   | -10.39  | -15.39  | -15.24  | -10.49  | -17.07  | -18.82  | -18.98  | -12.75  | -13.24  | -14.22  |
| Glu166 | -16.70 | -26.82  | -9.67   | -22.55  | -18.77  | -9.38   | -4.06   | -24.23  | -7.68   | -18.50  | -28.73  | -21.77  |
| Leu167 | -6.13  | --      | --      | -5.92   | -6.50   | -9.23   | -8.96   | -2.95   | -3.57   | -2.93   | -2.91   | -3.56   |
| Pro168 | 5.14   | --      | --      | -13.84  | -13.99  | -3.77   | -14.16  | -14.29  | -4.82   | -12.98  | -13.02  | -12.24  |
| Arg188 | 7.96   | -8.25   | --      | -2.48   | -2.32   | --      | -5.92   | -3.21   | -3.01   | -2.09   | -3.00   | -2.31   |
| Gln189 | -21.85 | -10.15  | --      | -27.23  | -22.35  | -30.65  | -25.30  | -23.53  | -20.72  | -27.13  | -17.70  | -28.79  |
| Gln192 | 77.18  | --      | --      | -10.62  | -7.51   | -9.12   | -13.29  | -1.17   | -7.27   | -12.04  | -1.32   | -2.74   |
| MDSG   | -40.06 | -149.30 | -148.05 | -170.70 | -167.30 | -168.12 | -124.70 | -156.18 | -146.09 | -154.50 | -173.24 | -163.64 |
| HBtot  | -30.01 | -9.17   | -36.02  | -23.26  | -10.97  | -16.72  | 16.95   | -13.09  | -9.69   | -29.56  | -27.38  | -15.39  |
| LE     | -1.18  | -3.93   | -3.70   | -4.27   | -3.80   | -3.82   | -3.78   | -4.22   | -3.75   | -3.96   | -4.03   | -3.81   |

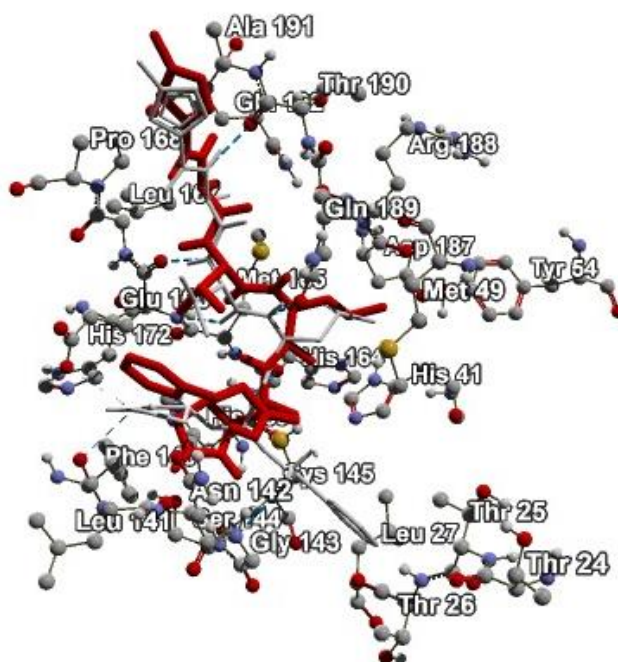

**Figure S6.** Crystal structure of CoV-2-Mpro (PDB:**6lu7**). Crystal conformation of the ligand is colored according to each atom and conformation obtained from the docking calculations is colored in red, RMSD (2.4 Å).

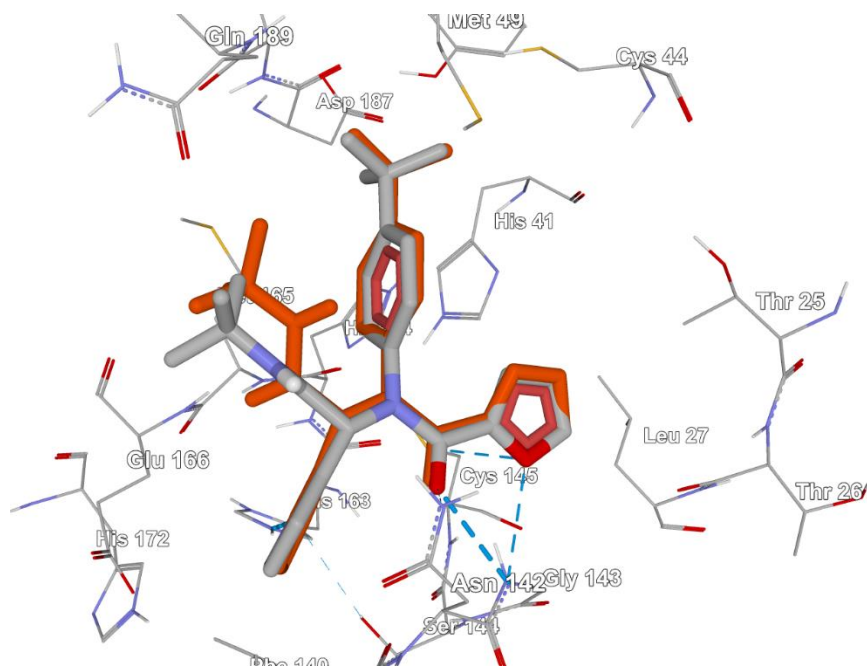

**Figure S7.** Crystal structure of CoV-2-Mpro (PDB:710d). Crystal conformation of the ligand is colored according to each atom and conformation obtained from the docking calculations is colored in orange, RMSD (0.4 Å).

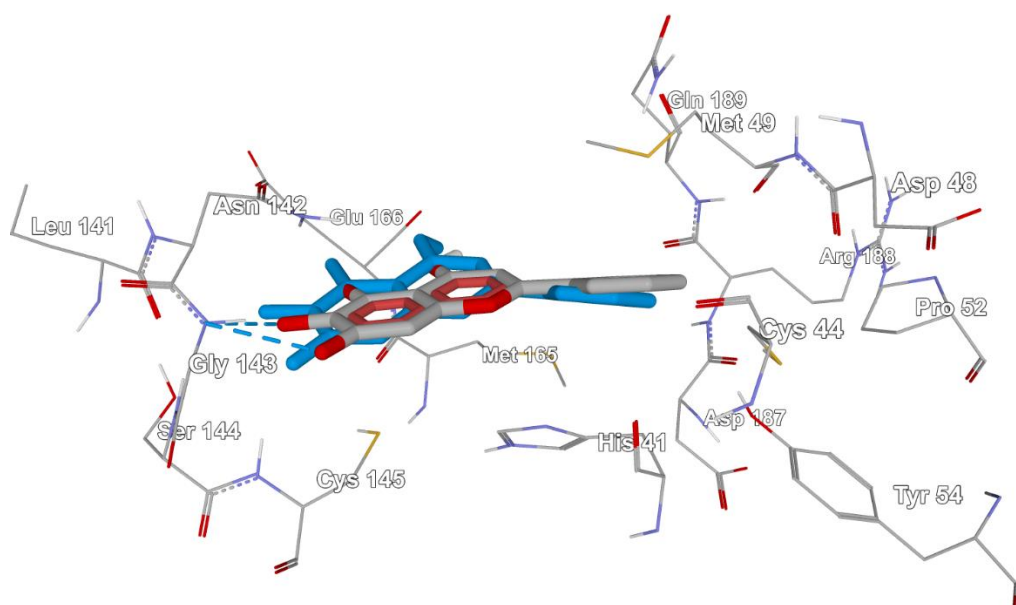

**Figure S8.** Crystal structure of CoV-2-Mpro (PDB:6m2n). Crystal conformation of the ligand is colored according to each atom and conformation obtained from the docking calculations is colored in blue, RMSD (1.2 Å).

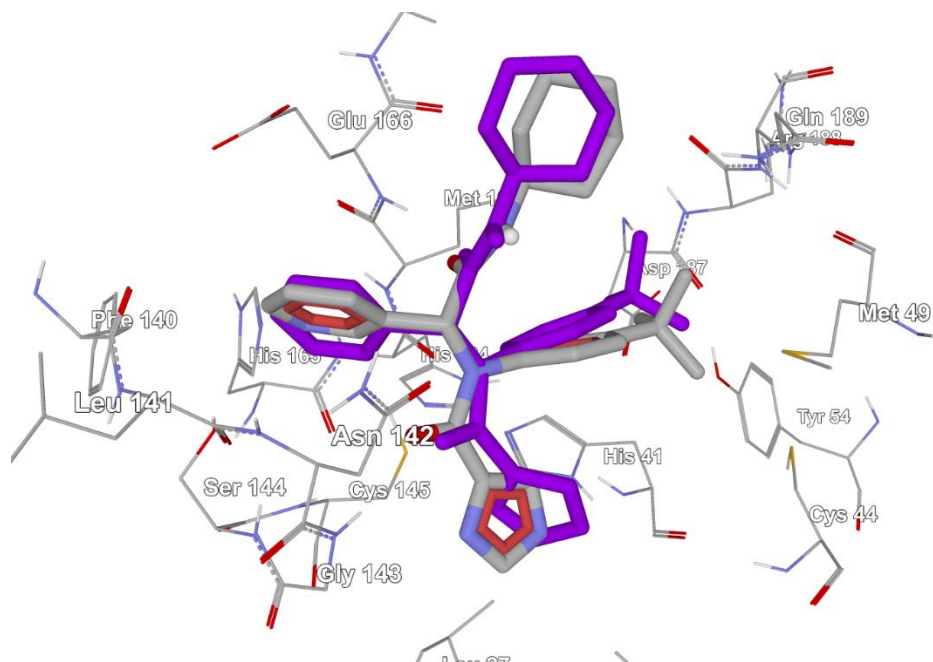

**Figure S9.** Crystal structure of CoV-2-Mpro (PDB:6w63). Crystal conformation of the ligand is colored according to each atom and conformation obtained from the docking calculations is colored in purple, RMSD (0.8 Å).

**Table S5.** Pharmacokinetics properties of FQ compounds by means of the SwissADME server.

| <b>Molecule</b> | <b>MLOGP</b> | <b>CYP1<br/>A2</b> | <b>CYP2<br/>C19</b> | <b>CYP2C<br/>9</b> | <b>CYP2D<br/>6</b> | <b>CYP3A<br/>4</b> | <b>Lipins<br/>ki</b> | <b>Ghos<br/>e</b> | <b>Vebe<br/>r</b> | <b>Ega<br/>n</b> | <b>Bioavailabili<br/>ty<br/>Score</b> |
|-----------------|--------------|--------------------|---------------------|--------------------|--------------------|--------------------|----------------------|-------------------|-------------------|------------------|---------------------------------------|
| <b>MFX</b>      | 1.39         | No                 | No                  | No                 | Yes                | No                 | 0                    | 0                 | 0                 | 0                | 0.55                                  |
| <b>CLIN</b>     | 1.52         | No                 | No                  | No                 | No                 | No                 | 0                    | 0                 | 0                 | 0                | 0.55                                  |
| <b>GFX</b>      | 1.75         | No                 | No                  | No                 | Yes                | No                 | 0                    | 0                 | 0                 | 0                | 0.55                                  |
| <b>TFX</b>      | 2.78         | No                 | No                  | No                 | No                 | No                 | 0                    | 0                 | 0                 | 0                | 0.55                                  |
| <b>LFX</b>      | 0.72         | No                 | No                  | No                 | No                 | No                 | 0                    | 0                 | 0                 | 0                | 0.55                                  |
| <b>CFX</b>      | 1.28         | No                 | No                  | No                 | No                 | No                 | 0                    | 0                 | 0                 | 0                | 0.55                                  |
| <b>SFX</b>      | 1.33         | No                 | No                  | No                 | Yes                | No                 | 0                    | 0                 | 0                 | 0                | 0.55                                  |
| <b>PFX</b>      | 1.28         | No                 | No                  | No                 | No                 | No                 | 0                    | 0                 | 0                 | 0                | 0.55                                  |
| <b>NFX</b>      | 1.04         | No                 | No                  | No                 | No                 | No                 | 0                    | 0                 | 0                 | 0                | 0.55                                  |
| <b>SIT</b>      | 2.08         | No                 | No                  | No                 | Yes                | No                 | 0                    | 0                 | 0                 | 0                | 0.55                                  |
| <b>TSF</b>      | 2.56         | No                 | No                  | No                 | No                 | No                 | 0                    | 0                 | 0                 | 0                | 0.55                                  |
| <b>LMF</b>      | 1.67         | No                 | No                  | No                 | No                 | No                 | 0                    | 0                 | 0                 | 0                | 0.55                                  |
| <b>13</b>       | 1.98         | No                 | No                  | Yes                | No                 | Yes                | 2                    | 2                 | 0                 | 0                | 0.17                                  |
| <b>14</b>       | 2.05         | No                 | No                  | Yes                | Yes                | Yes                | 2                    | 3                 | 0                 | 1                | 0.17                                  |
| <b>15</b>       | 1.82         | No                 | No                  | Yes                | No                 | Yes                | 2                    | 2                 | 0                 | 0                | 0.17                                  |
| <b>16</b>       | 3.31         | No                 | No                  | Yes                | Yes                | Yes                | 1                    | 3                 | 0                 | 0                | 0.55                                  |
| <b>17</b>       | 3.53         | No                 | Yes                 | Yes                | Yes                | Yes                | 1                    | 3                 | 0                 | 0                | 0.55                                  |
| <b>18</b>       | 3.33         | No                 | Yes                 | Yes                | Yes                | Yes                | 1                    | 3                 | 0                 | 0                | 0.55                                  |
| <b>19</b>       | 2.21         | No                 | No                  | Yes                | Yes                | Yes                | 2                    | 3                 | 0                 | 0                | 0.17                                  |
| <b>1</b>        | 2.14         | No                 | No                  | No                 | No                 | No                 | 0                    | 1                 | 0                 | 0                | 0.55                                  |
| <b>2</b>        | 2.74         | No                 | Yes                 | Yes                | Yes                | No                 | 1                    | 2                 | 0                 | 0                | 0.55                                  |
| <b>3</b>        | 3.14         | No                 | No                  | Yes                | Yes                | Yes                | 1                    | 3                 | 0                 | 0                | 0.55                                  |
| <b>4</b>        | 3.14         | No                 | No                  | Yes                | Yes                | Yes                | 1                    | 3                 | 0                 | 0                | 0.55                                  |
| <b>5</b>        | 3.86         | No                 | Yes                 | Yes                | Yes                | Yes                | 1                    | 3                 | 0                 | 0                | 0.55                                  |
| <b>6</b>        | 3.86         | No                 | Yes                 | Yes                | Yes                | Yes                | 1                    | 3                 | 0                 | 0                | 0.55                                  |
| <b>7</b>        | 1.93         | No                 | No                  | No                 | No                 | No                 | 0                    | 0                 | 0                 | 0                | 0.55                                  |
| <b>8</b>        | 2.81         | No                 | Yes                 | Yes                | No                 | Yes                | 1                    | 2                 | 0                 | 0                | 0.55                                  |
| <b>9</b>        | 2.94         | No                 | No                  | Yes                | Yes                | Yes                | 1                    | 3                 | 0                 | 0                | 0.55                                  |
| <b>10</b>       | 2.94         | No                 | No                  | Yes                | Yes                | Yes                | 1                    | 3                 | 0                 | 0                | 4.36                                  |
| <b>11</b>       | 3.77         | No                 | Yes                 | Yes                | Yes                | Yes                | 1                    | 3                 | 0                 | 0                | 4.69                                  |
| <b>12</b>       | 3.77         | No                 | Yes                 | Yes                | Yes                | Yes                | 1                    | 3                 | 0                 | 0                | 4.69                                  |

## Infrared (FTIR-ATR) Spectroscopy Spectrum

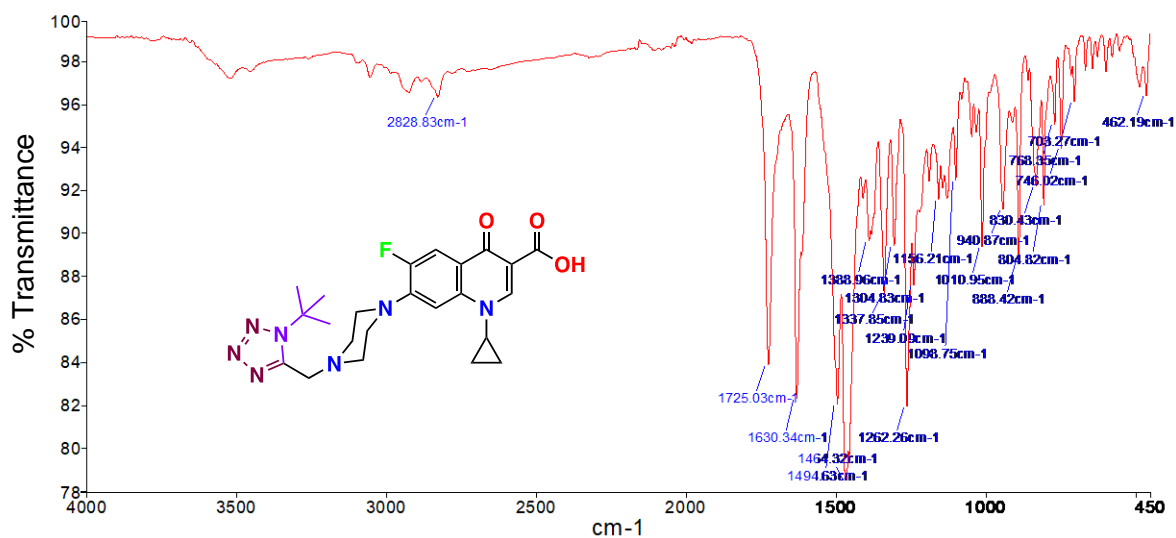

**Figure S10.** 7-(4-((1-(*ter*-butyl)-1*H*-tetrazol-5-yl)methyl)piperazin-1-yl)-1-cyclopropyl-6-fluoro-4-oxo-1,4-dihydroquinoline-3-carboxylic acid **1**.

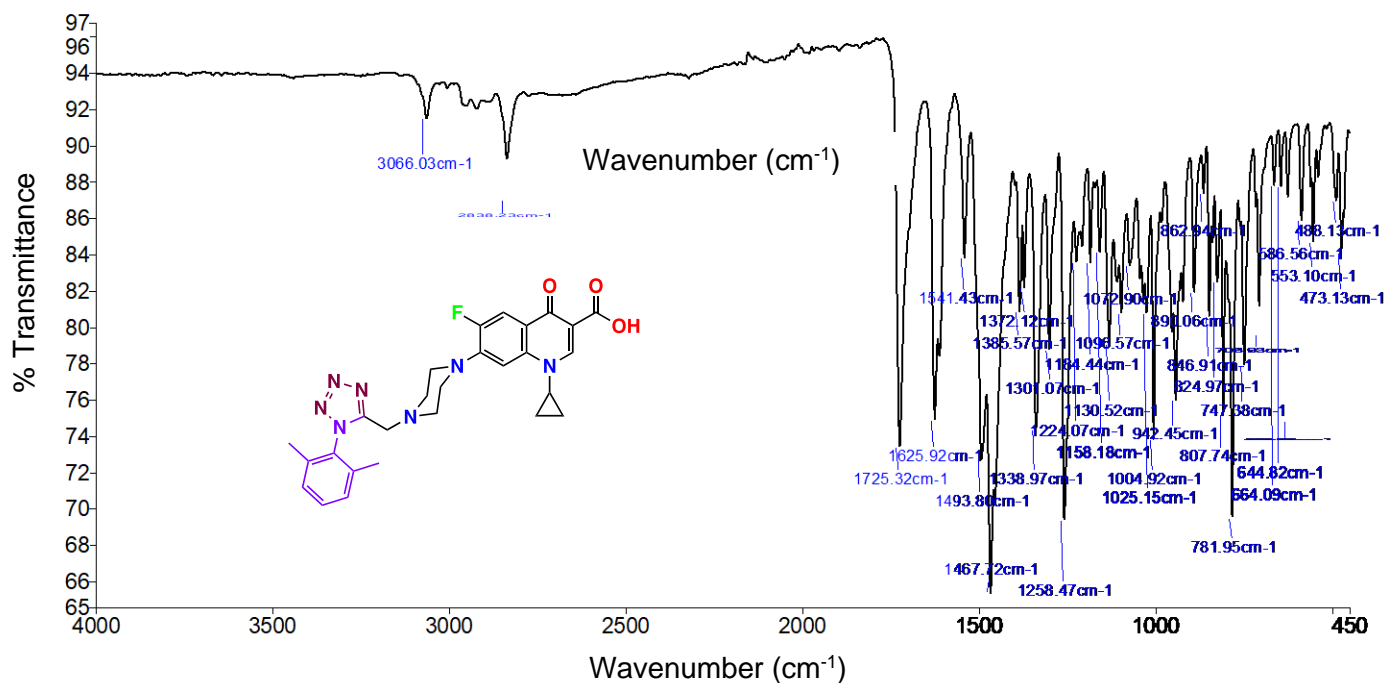

**Figure S11.** 1-cyclopropyl-7-(4-((1-(2,6-dimethylphenyl)-1*H*-tetrazol-5-yl)methyl)piperazin-1-yl)-6-fluoro-4-oxo-1,4-dihydroquinoline-3-carboxylic acid **2**.

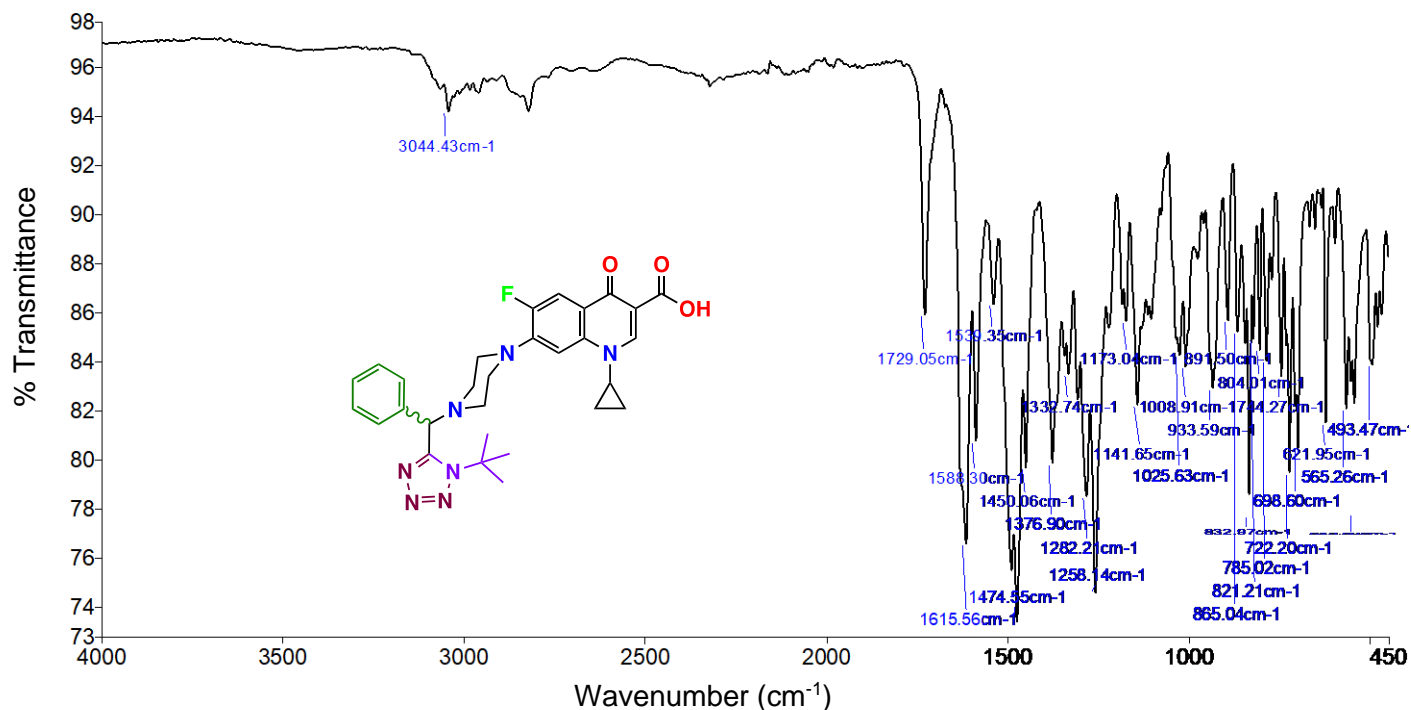

**Figure S12.** (*R/S*)-7-(4-((1-(*ter*-butyl)-1*H*-tetrazol-5-yl)(phenyl)methyl)piperazin-1-yl)-1-cyclopropyl-6-fluoro-4-oxo-1,4-dihydroquinoline-3-carboxylic acid **3,4**.

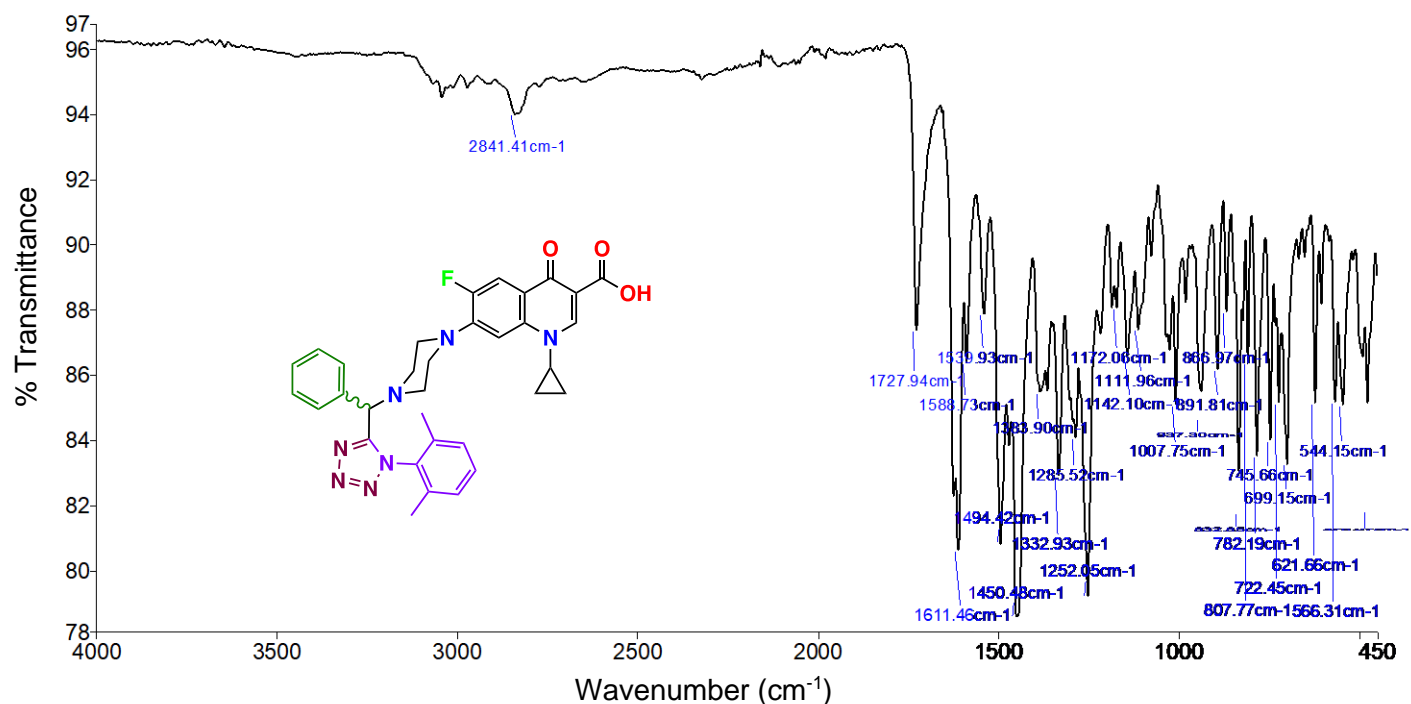

**Figure S13.** (*R/S*)-1-cyclopropyl-7-(4-((1-(2,6-dimethylphenyl)-1*H*-tetrazol-5-yl)(phenyl)methyl)piperazin-1-yl)-6-fluoro-4-oxo-1,4-dihydroquinoline-3-carboxylic acid **5, 6**.



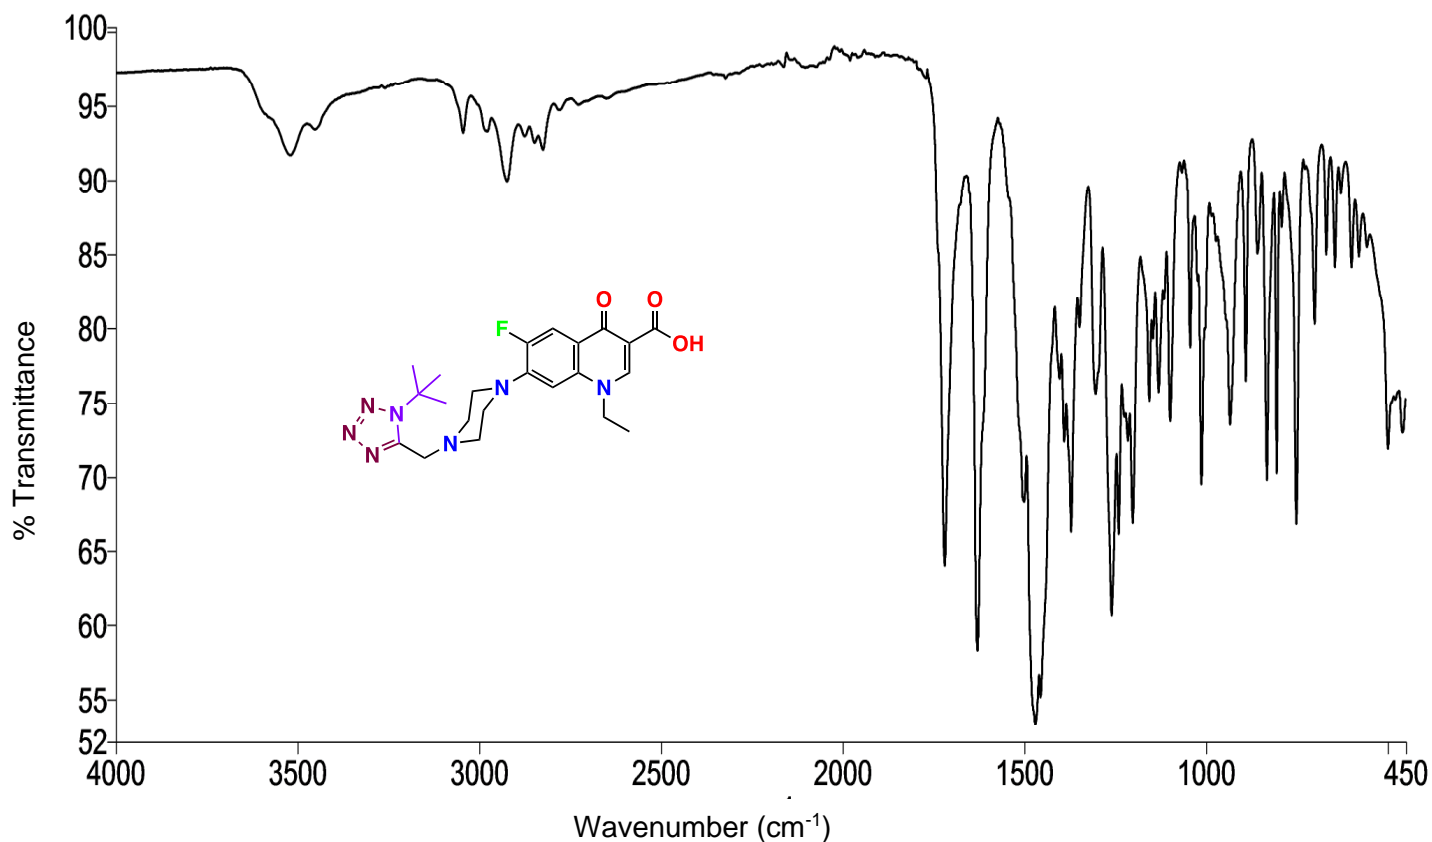

**Figure S14.** 7-(4-((1-(*ter*-buthyl)-1*H*-tetrazol-5-yl)methyl)piperazin-1-yl)-1-ethyl-6-fluoro-4-oxo-1,4-dihydroquinoline-3-carboxylic acid **7**.

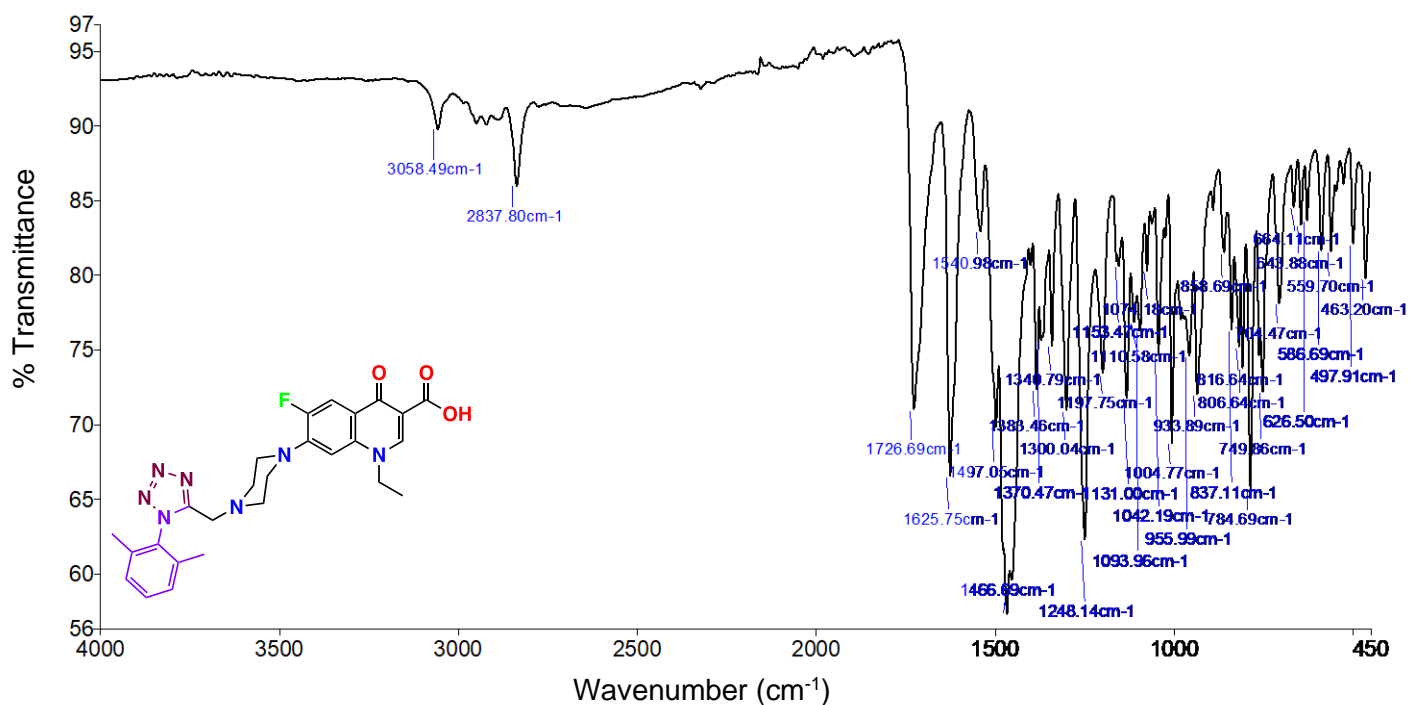

**Figure S15.** 7-(4-((1-(2,6-dimethylphenyl)-1*H*-tetrazol-5-yl)methyl)piperazin-1-yl)-1-ethyl-6-fluoro-4-oxo-1,4-dihydroquinoline-3-carboxylic acid **8**.

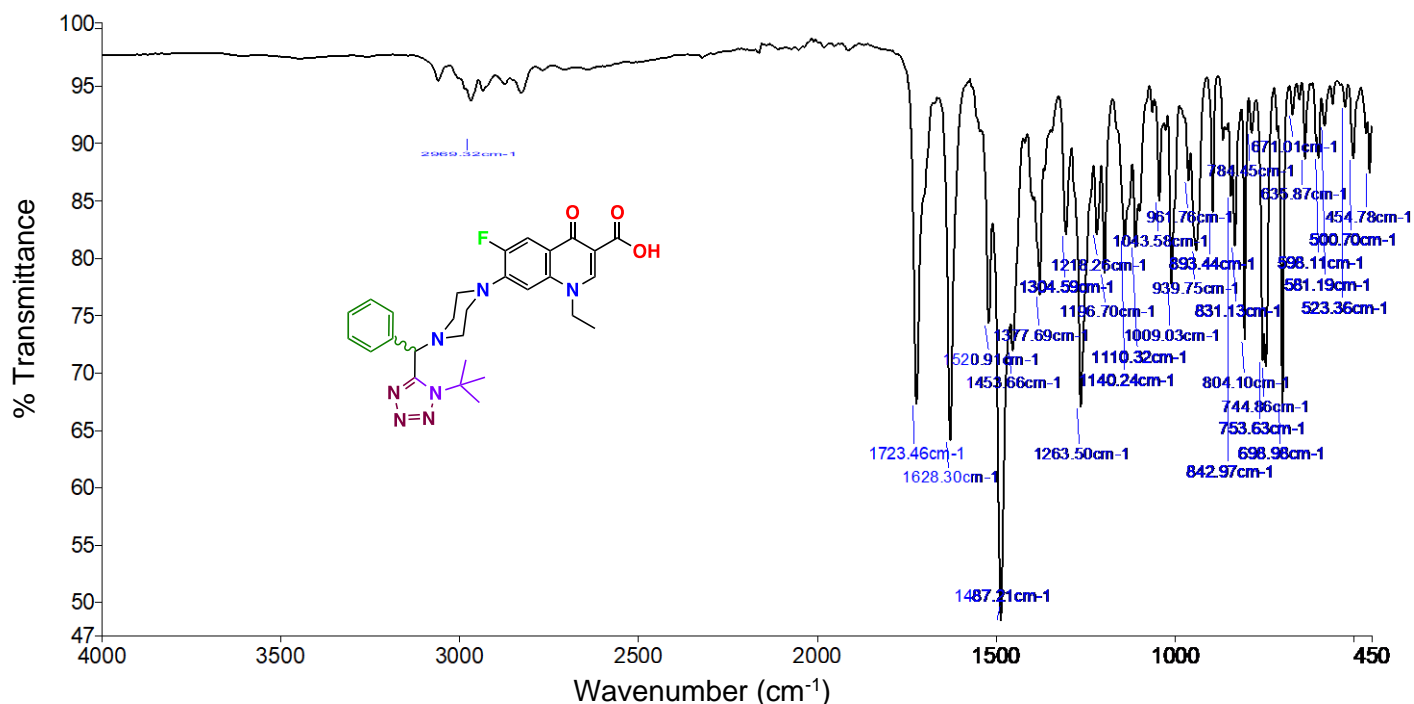

**Figure S16.** (R/S)-7-(4-((1-(ter-buthyl)-1H-tetrazol-5-yl)(phenyl)methyl)piperazin-1-yl)-1-ethyl-6-fluoro-4-oxo-1,4-dihydroquinoline-3-carboxylic acid **9**, **10**.

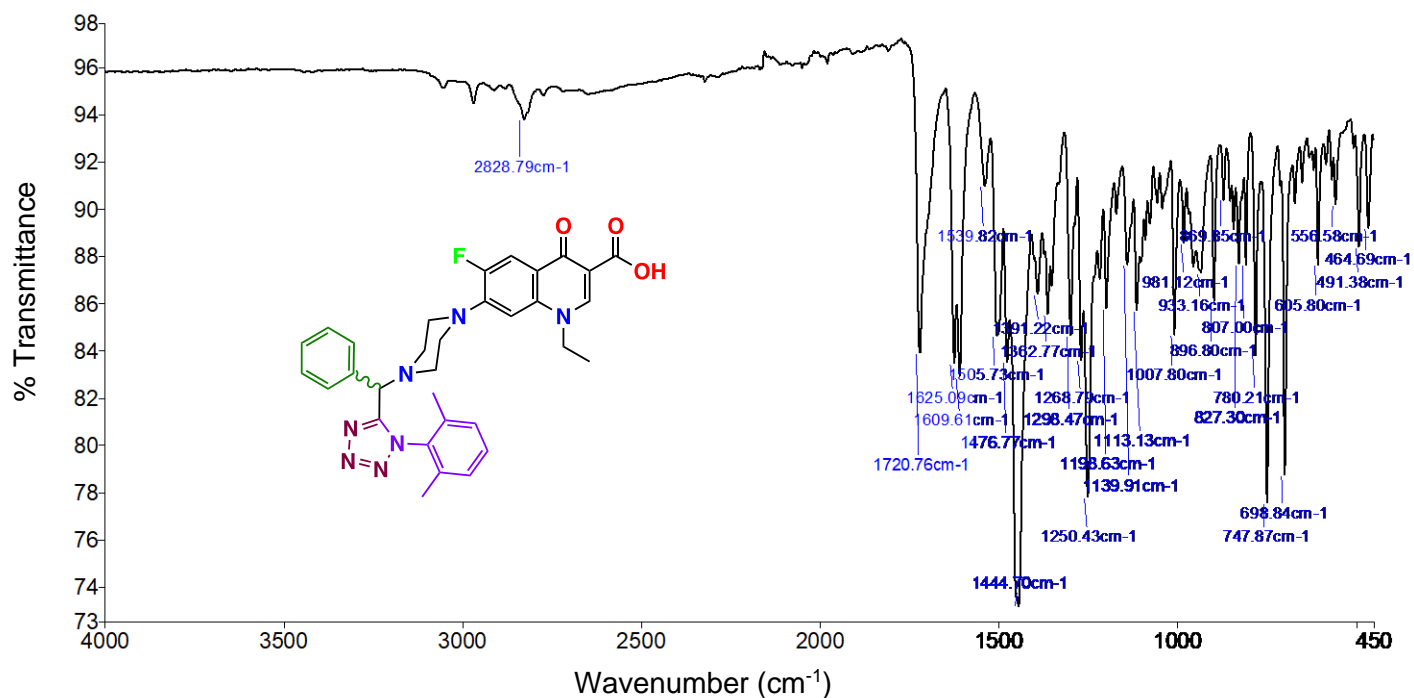

**Figure S17.** (R/S)-7-(4-((1-(2,6-dimethylphenyl)-1H-tetrazol-5-yl)(phenyl)methyl)piperazin-1-yl)-1-ethyl-6-fluoro-4-oxo-1,4-dihydroquinoline-3-carboxylic acid **11**, **12**.

# <sup>1</sup>H Resonance Magnetic Nuclear Spectroscopy Spectrum

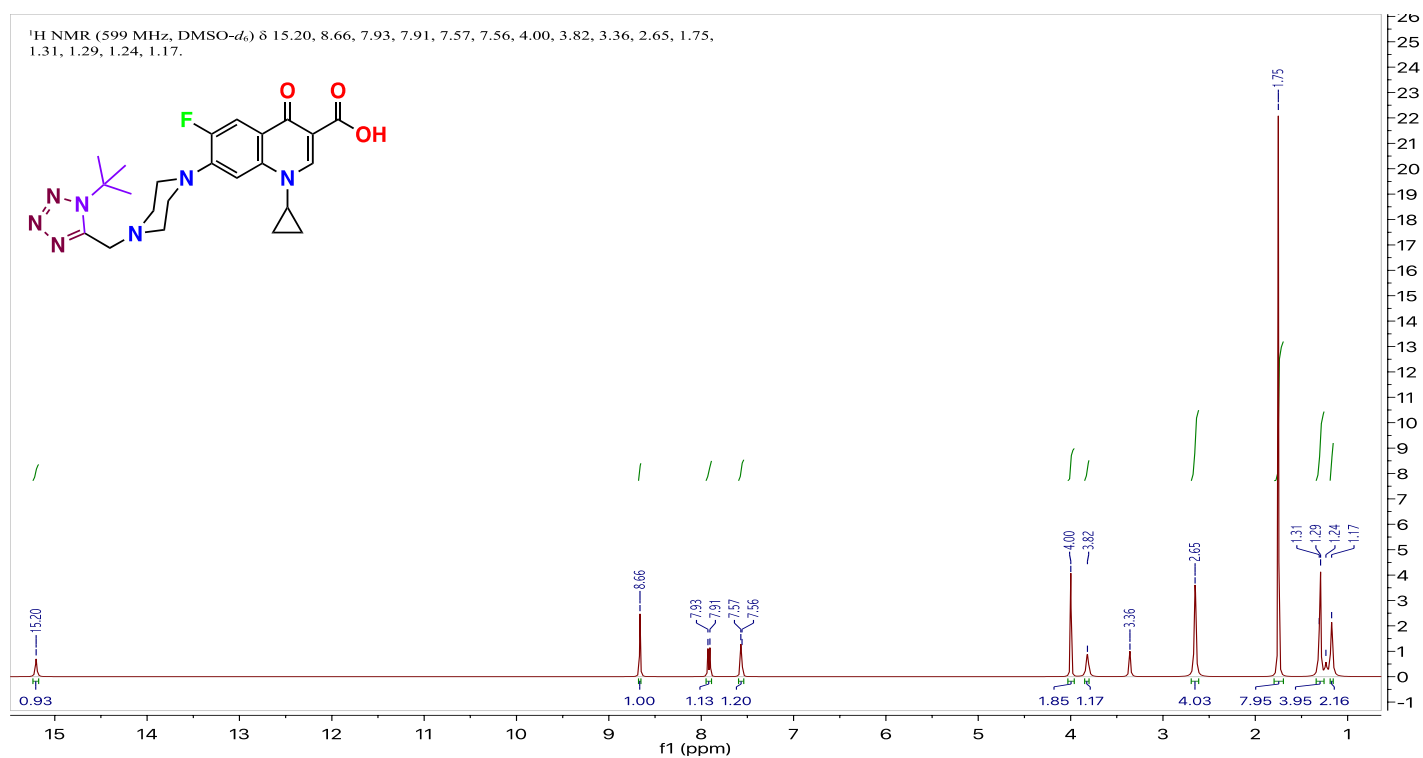

**Figure S18.** 7-(4-((1-(*tert*-butyl)-1*H*-tetrazol-5-yl)methyl)piperazin-1-yl)-1-cyclopropyl-6-fluoro-4-oxo-1,4-dihydroquinoline-3-carboxylic acid **1**.

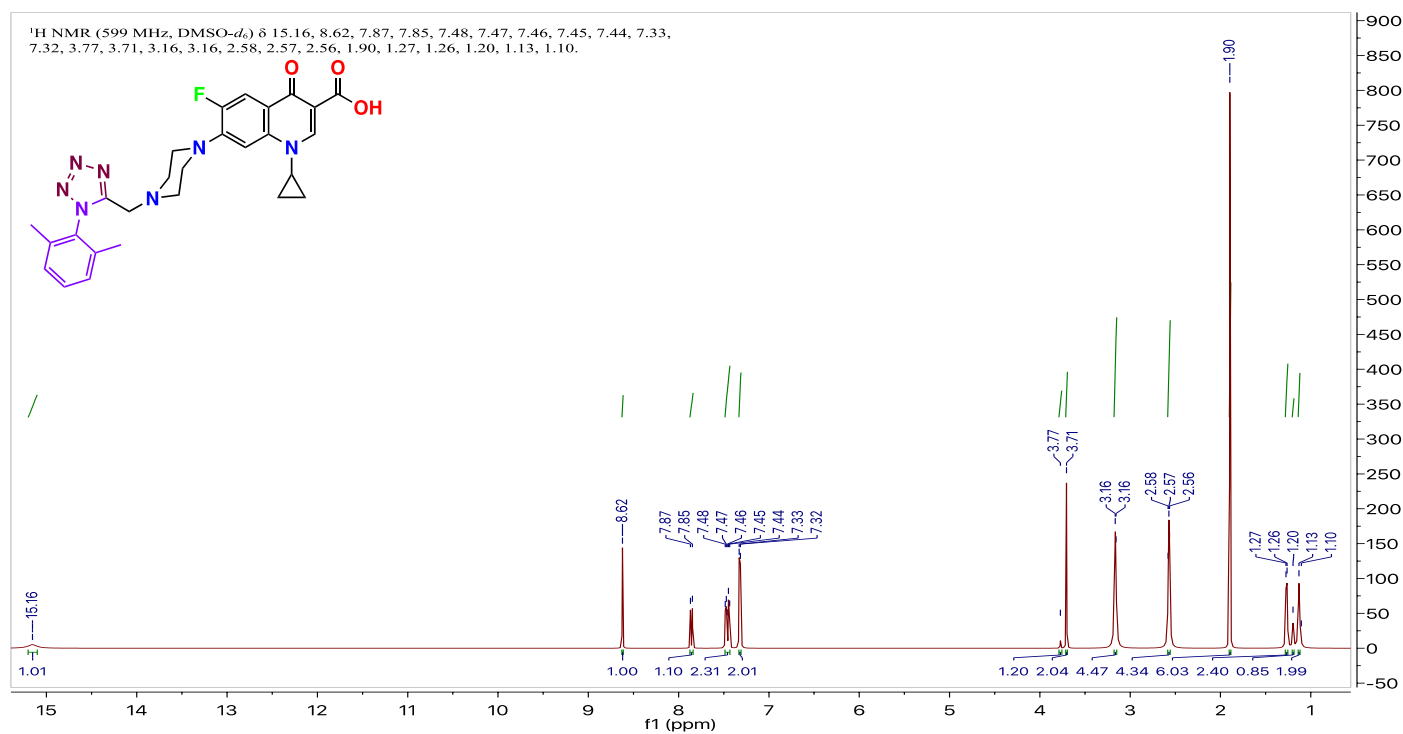

**Figure S19.** 1-cyclopropyl-7-(4-((1-(2,6-dimethylphenyl)-1*H*-tetrazol-5-yl)methyl)piperazin-1-yl)-6-fluoro-4-oxo-1,4-dihydroquinoline-3-carboxylic acid **2**.

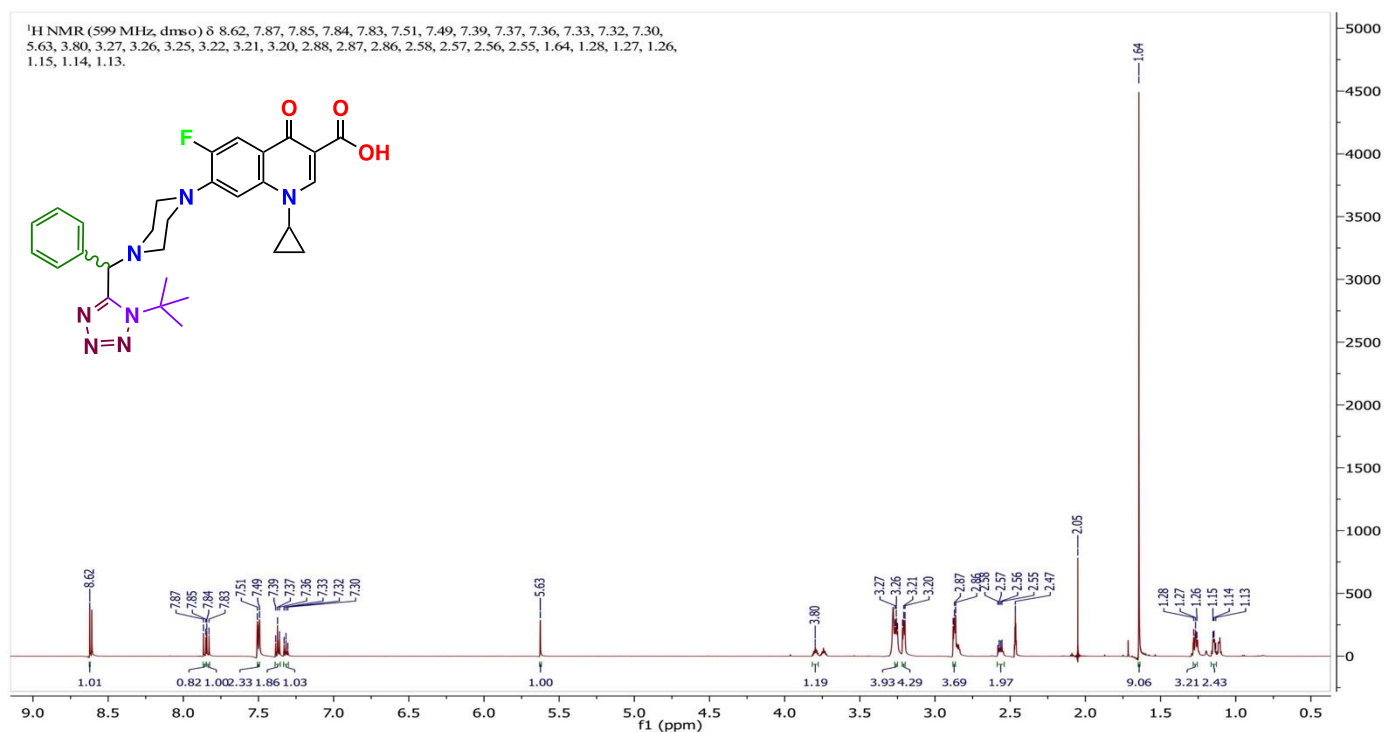

**Figure S20.** (*R/S*)-7-(4-((1-(*ter*-butyl)-1*H*-tetrazol-5-yl)(phenyl)methyl)piperazin-1-yl)-1-cyclopropyl-6-fluoro-4-oxo-1,4-dihydroquinoline-3-carboxylic acid **3**, **4**.

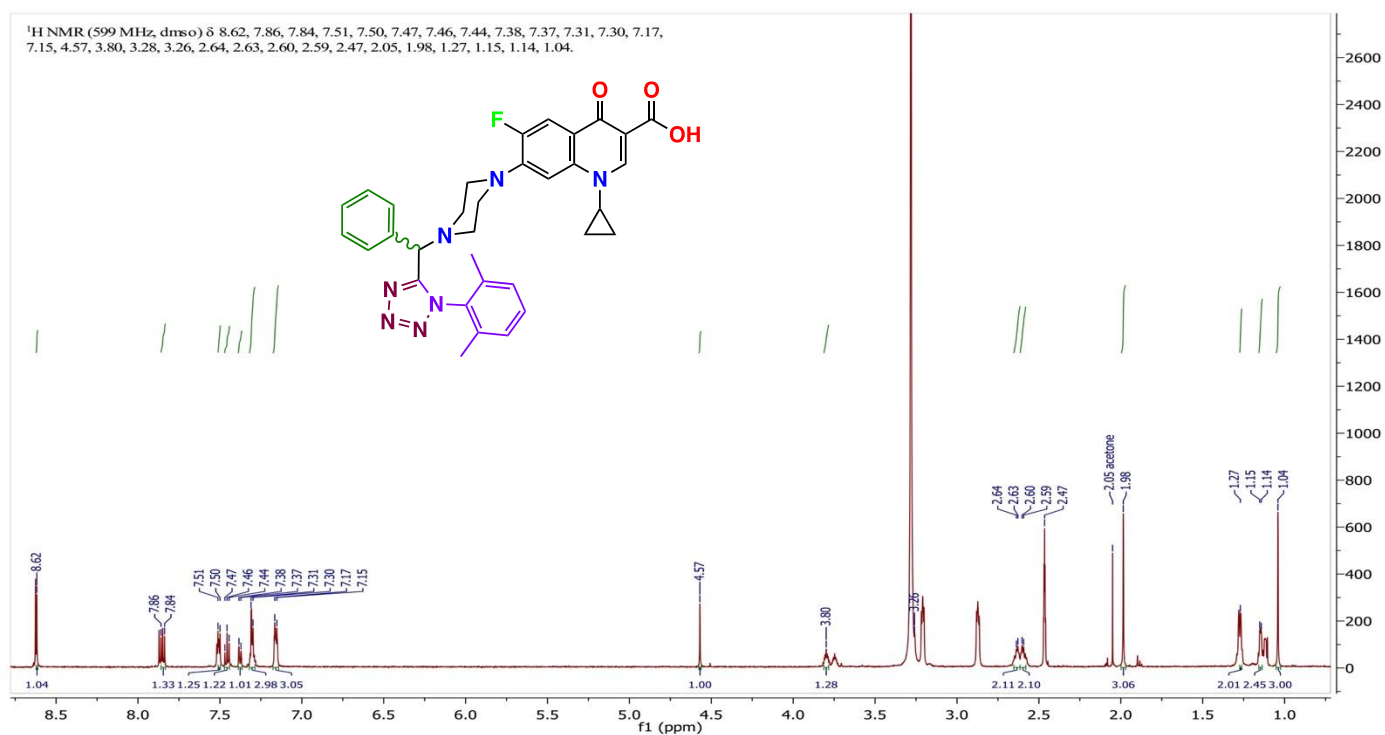

**Figure S21.** (*R/S*)-1-cyclopropyl-7-(4-((1-(2,6-dimethylphenyl)-1*H*-tetrazol-5-yl)(phenyl)methyl)piperazin-1-yl)-6-fluoro-4-oxo-1,4-dihydroquinoline-3-carboxylic acid **5**, **6**.

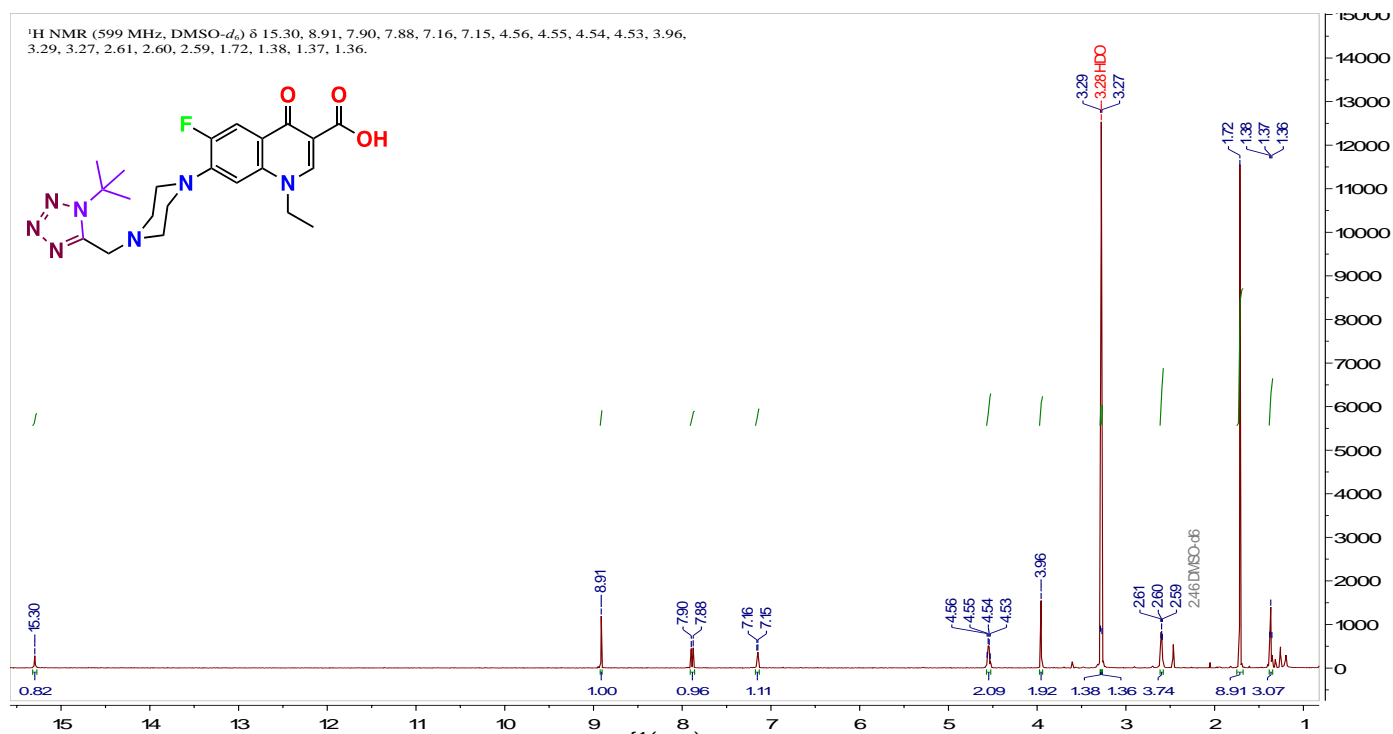

**Figure S22.** 7-(4-((1-(*tert*-butyl)-1*H*-tetrazol-5-yl)methyl)piperazin-1-yl)-1-ethyl-6-fluoro-4-oxo-1,4-dihydroquinoline-3-carboxylic acid **7**.

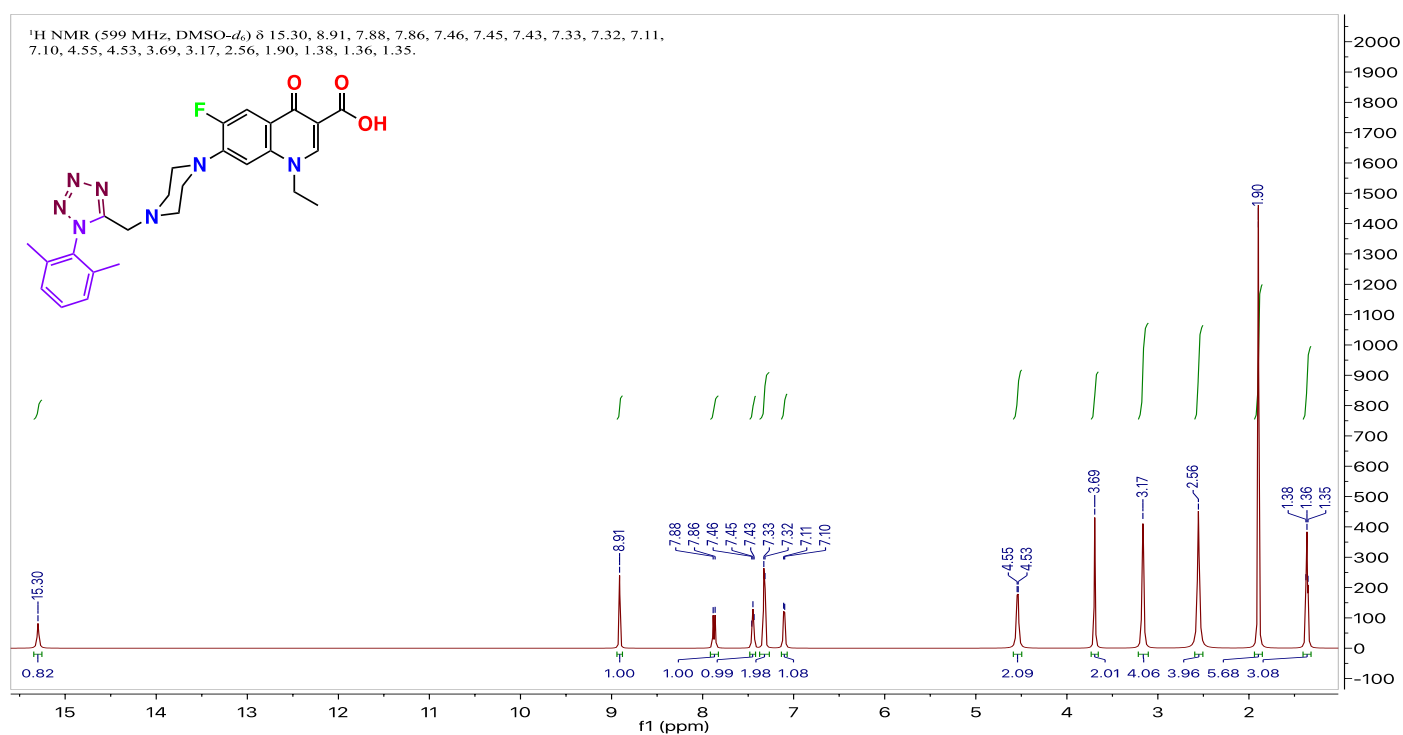

**Figure S23.** 7-(4-((1-(2,6-dimethylphenyl)-1*H*-tetrazol-5-yl)methyl)piperazin-1-yl)-1-ethyl-6-fluoro-4-oxo-1,4-dihydroquinoline-3-carboxylic acid **8**.

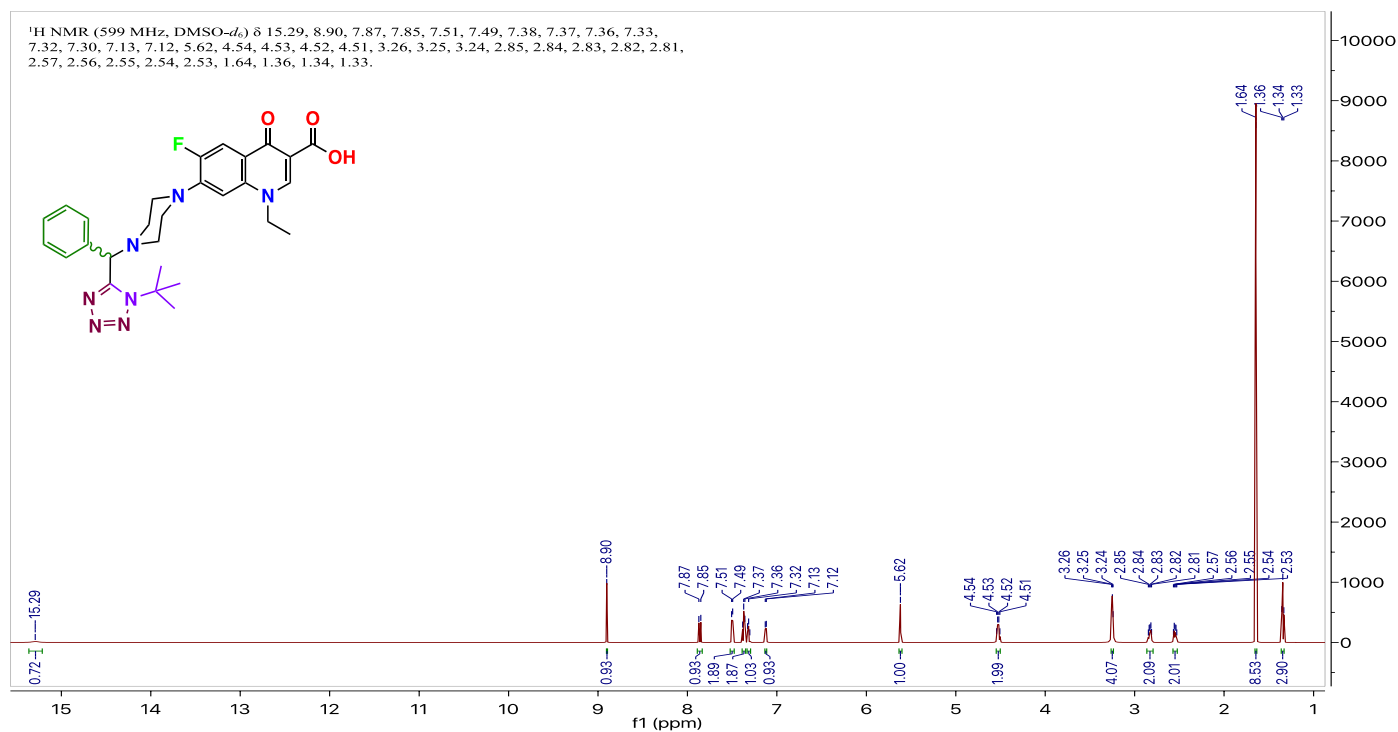

**Figure S24.** (R/S)-7-(4-((1-(*ter*-butyl)-1*H*-tetrazol-5-yl)(phenyl)methyl)piperazin-1-yl)-1-ethyl-6-fluoro-4-oxo-1,4-dihydroquinoline-3-carboxylic acid **9, 10**.

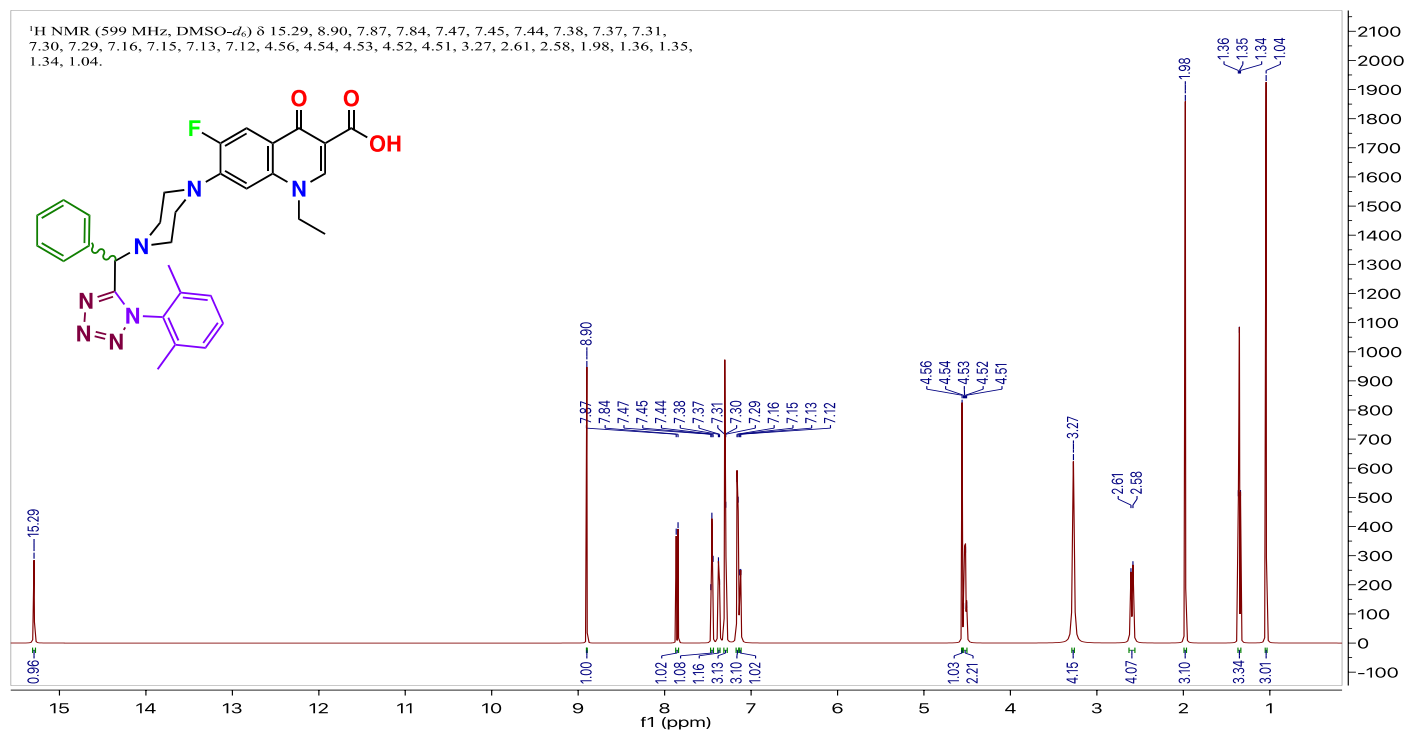

**Figure S25.** (R/S)-7-(4-((1-(2,6-dimethylphenyl)-1*H*-tetrazol-5-yl)(phenyl)methyl)piperazin-1-yl)-1-ethyl-6-fluoro-4-oxo-1,4-dihydroquinoline-3-carboxylic acid **11, 12**.

# <sup>13</sup>C Resonance Magnetic Nuclear Spectroscopy Spectrum

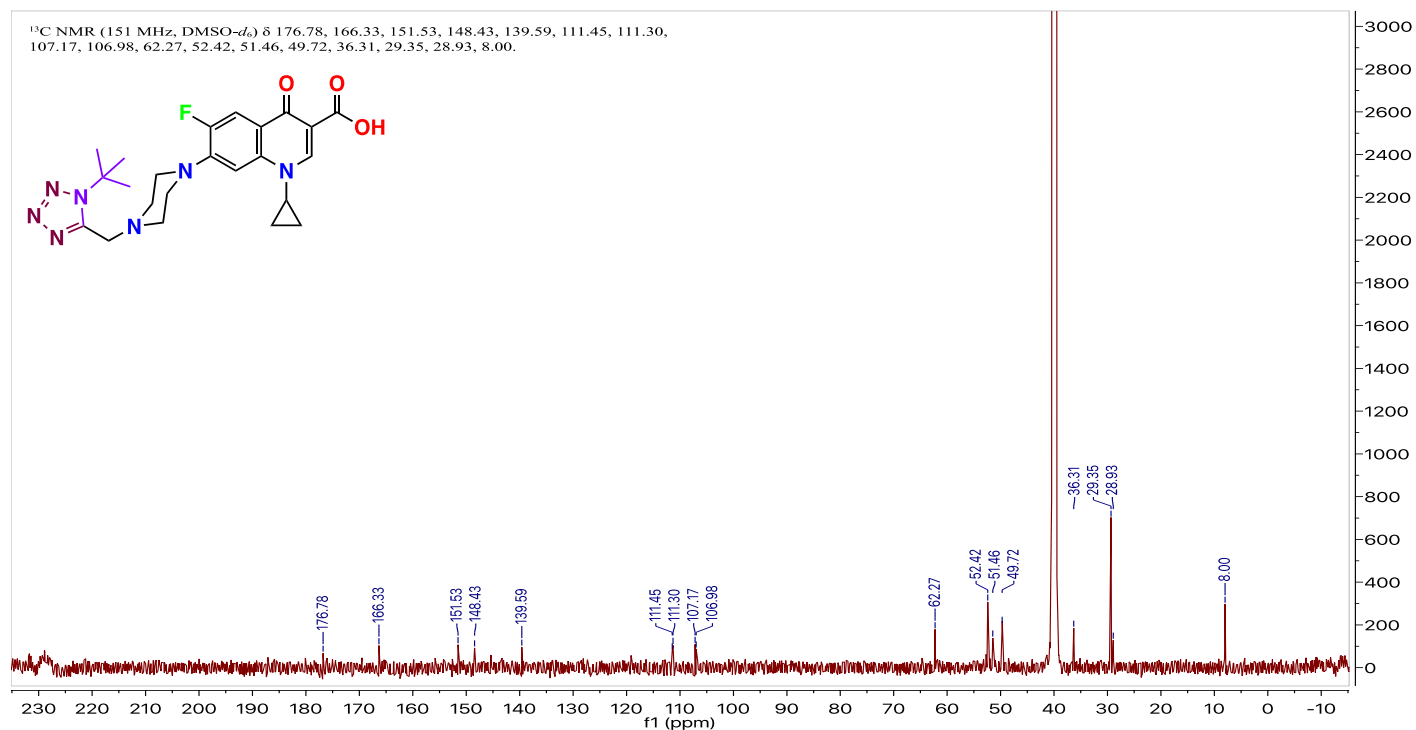

**Figure S26.** 7-(4-((1-(*tert*-butyl)-1*H*-tetrazol-5-yl)methyl)piperazin-1-yl)-1-cyclopropyl-6-fluoro-4-oxo-1,4-dihydroquinoline-3-carboxylic acid **1**.

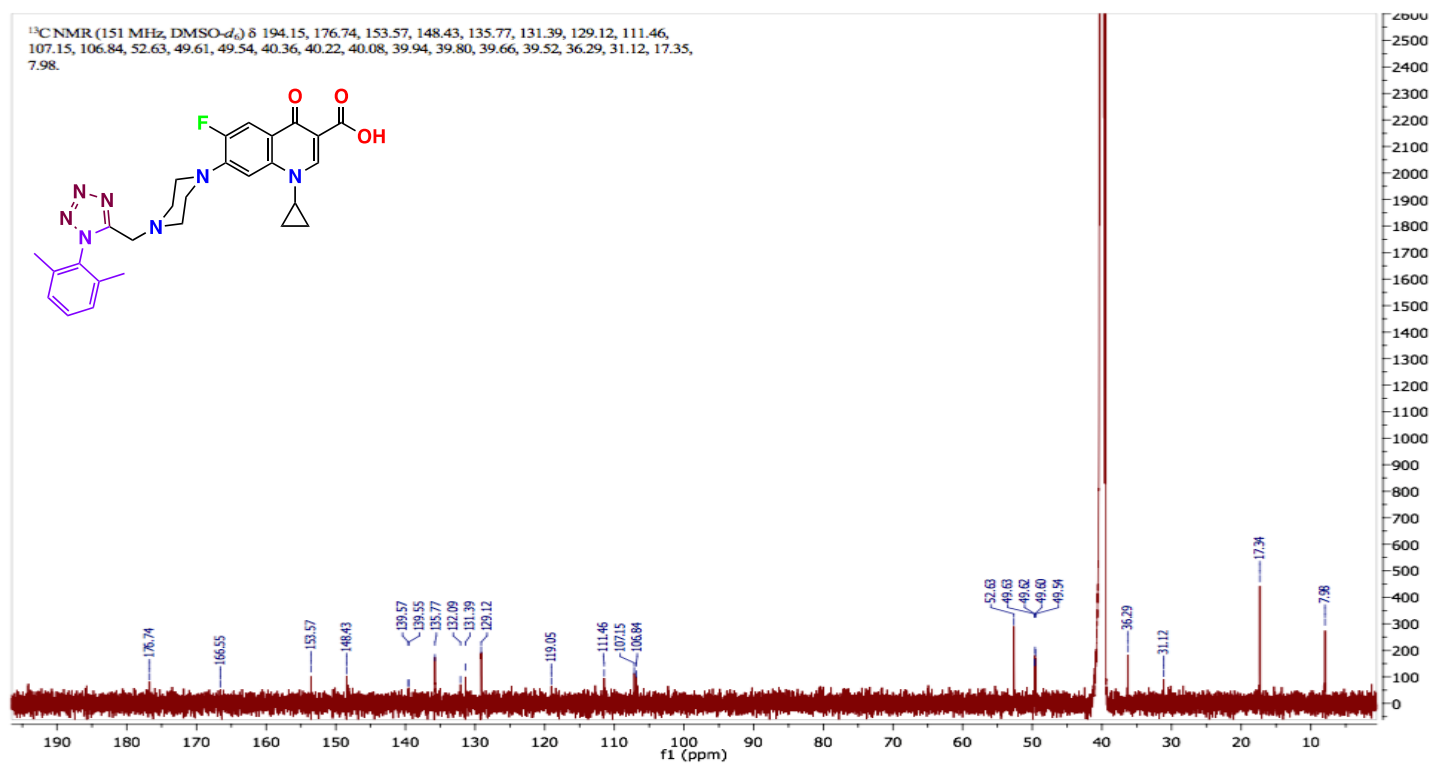

**Figure S27.** 1-cyclopropyl-7-(4-((1-(2,6-dimethylphenyl)-1*H*-tetrazol-5-yl)methyl)piperazin-1-yl)-6-fluoro-4-oxo-1,4-dihydroquinoline-3-carboxylic acid **2**.

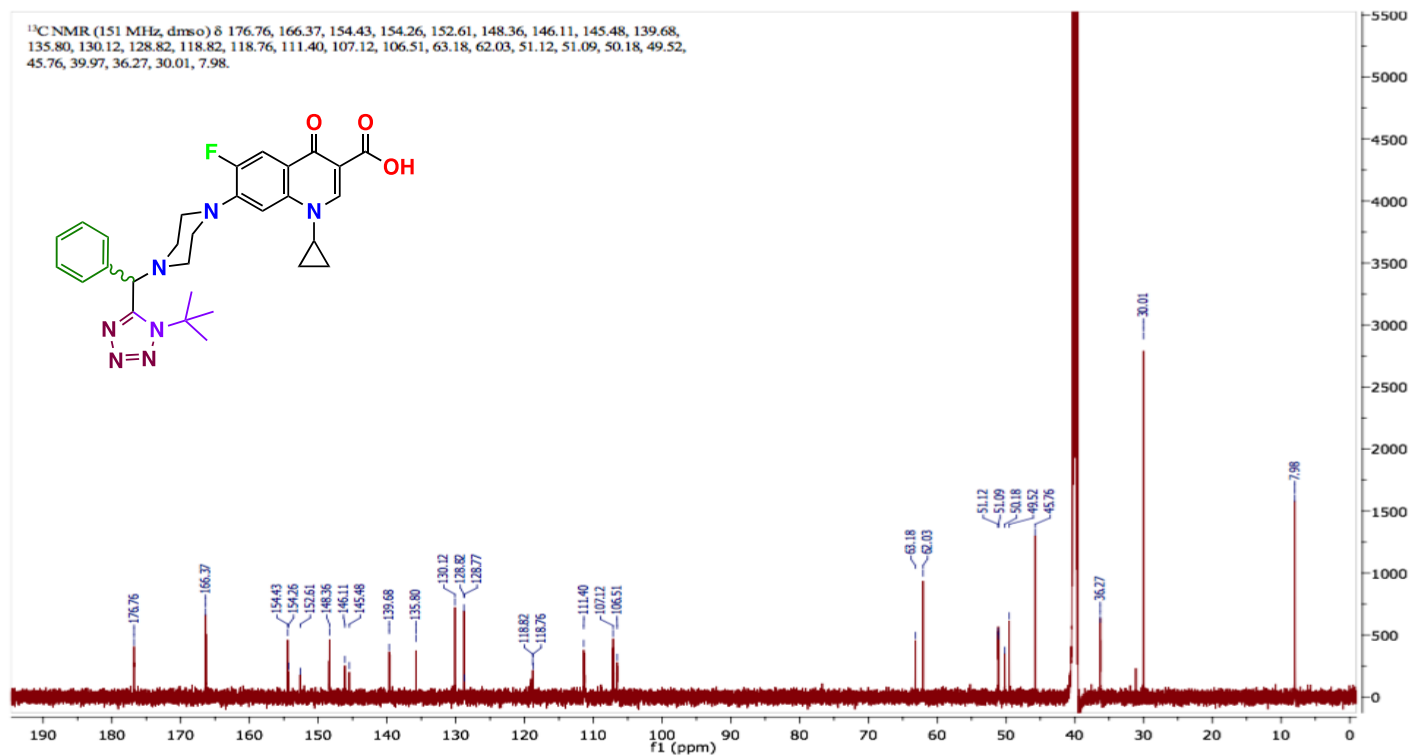

**Figure S28.** (*R/S*)-7-(4-((1-(*ter*-butyl)-1*H*-tetrazol-5-yl)(phenyl)methyl)piperazin-1-yl)-1-cyclopropyl-6-fluoro-4-oxo-1,4-dihydroquinoline-3-carboxylic acid **3**, **4**.

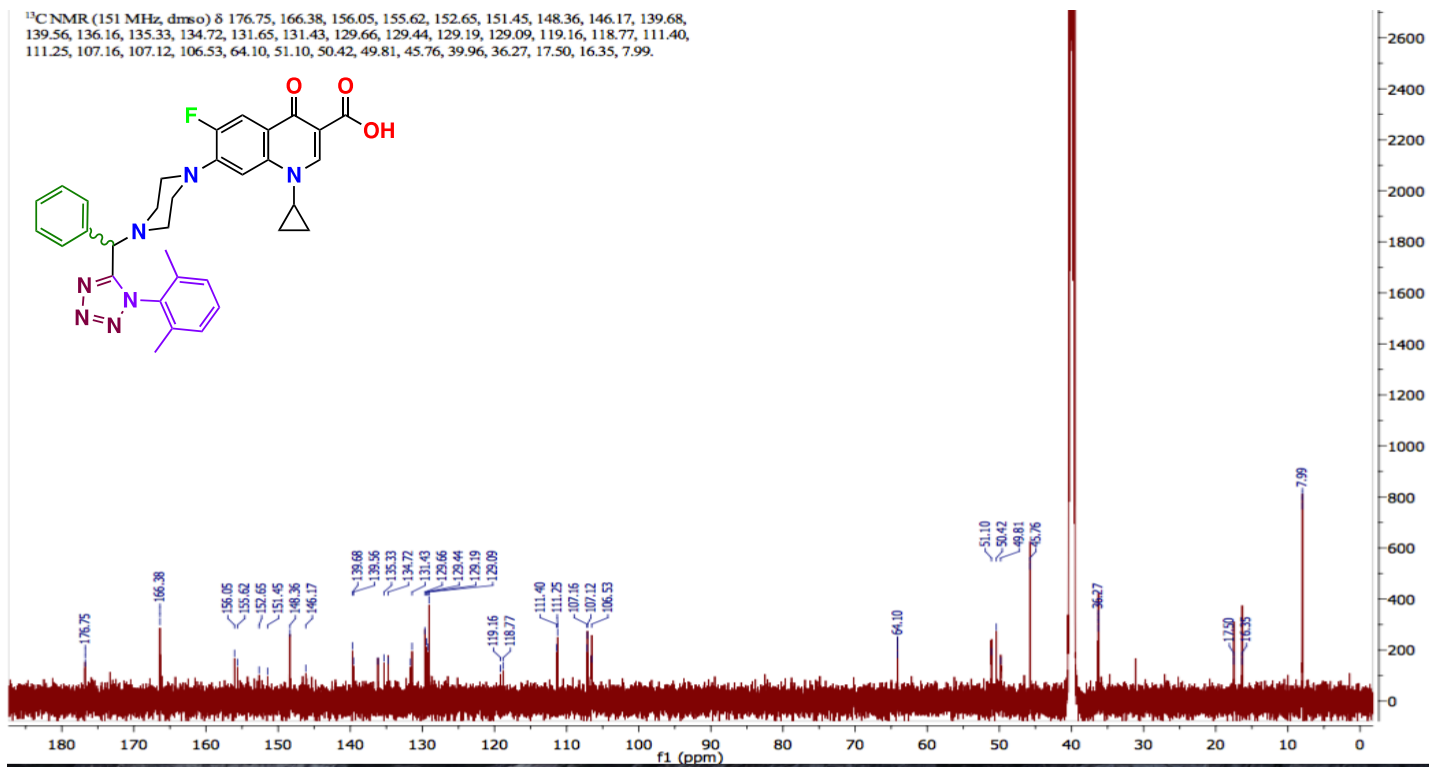

**Figure S29.** (*R/S*)-1-cyclopropyl-7-(4-((1-(2,6-dimethylphenyl)-1*H*-tetrazol-5-yl)(phenyl)methyl)piperazin-1-yl)-6-fluoro-4-oxo-1,4-dihydroquinoline-3-carboxylic acid **5**, **6**.



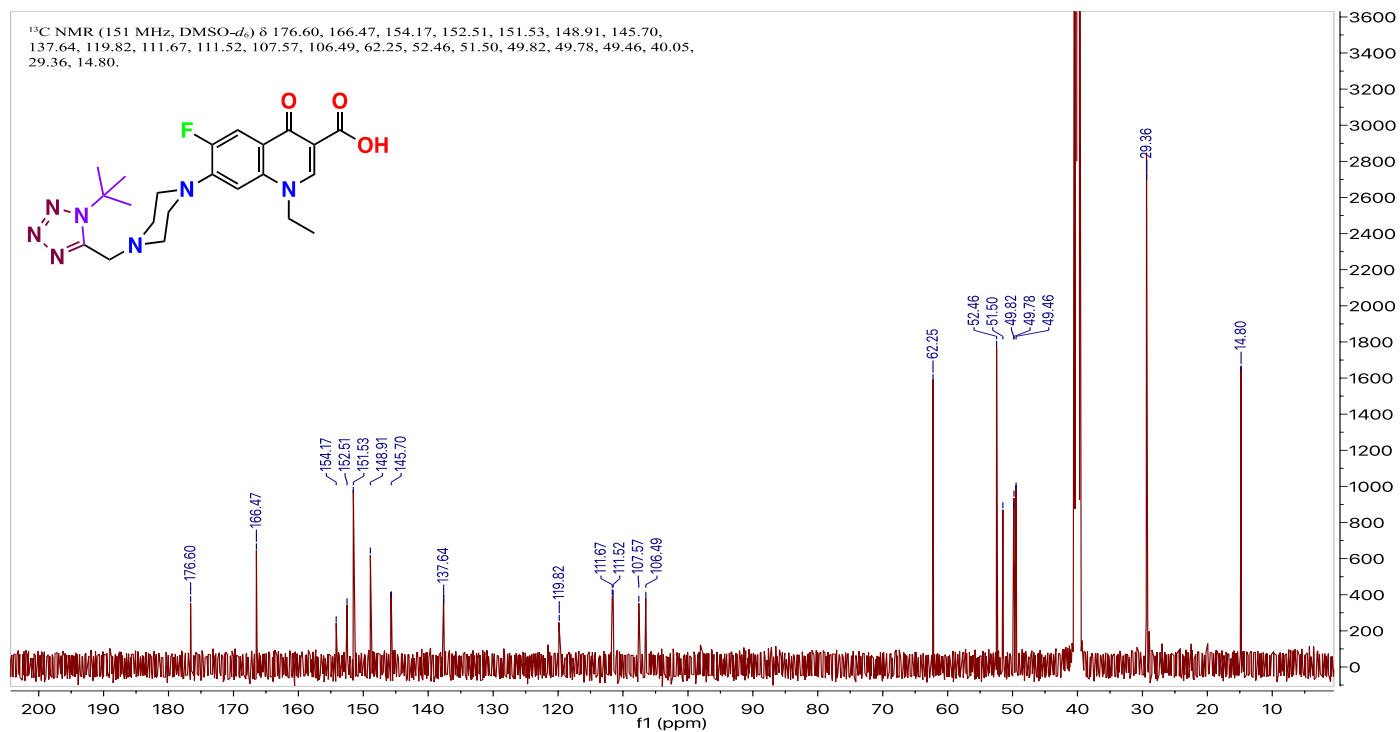

**Figure S30.** 7-(4-((1-(*tert*-butyl)-1*H*-tetrazol-5-yl)methyl)piperazin-1-yl)-1-ethyl-6-fluoro-4-oxo-1,4-dihydroquinoline-3-carboxylic acid **7**.

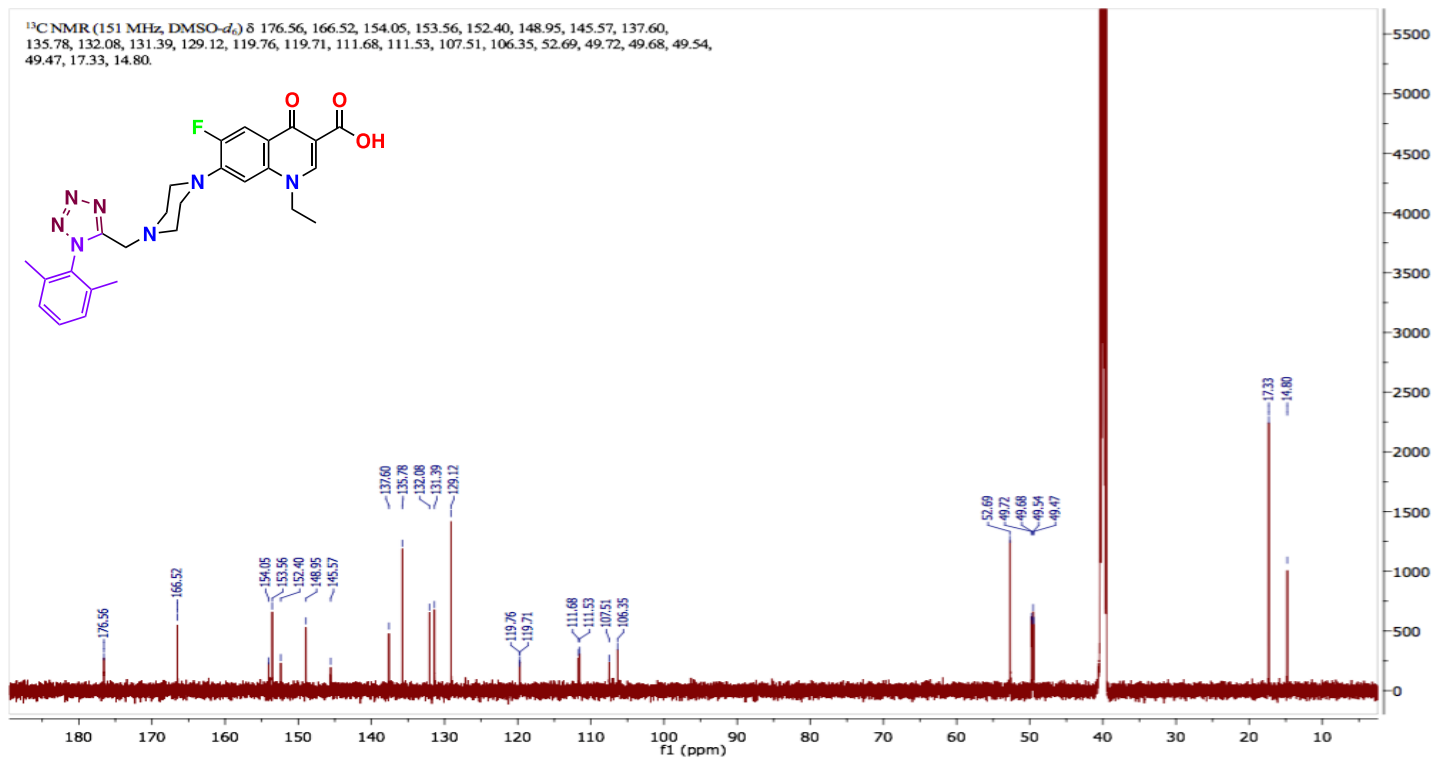

**Figure S31.** 7-(4-((1-(2,6-dimethylphenyl)-1*H*-tetrazol-5-yl)methyl)piperazin-1-yl)-1-ethyl-6-fluoro-4-oxo-1,4-dihydroquinoline-3-carboxylic acid **8**.

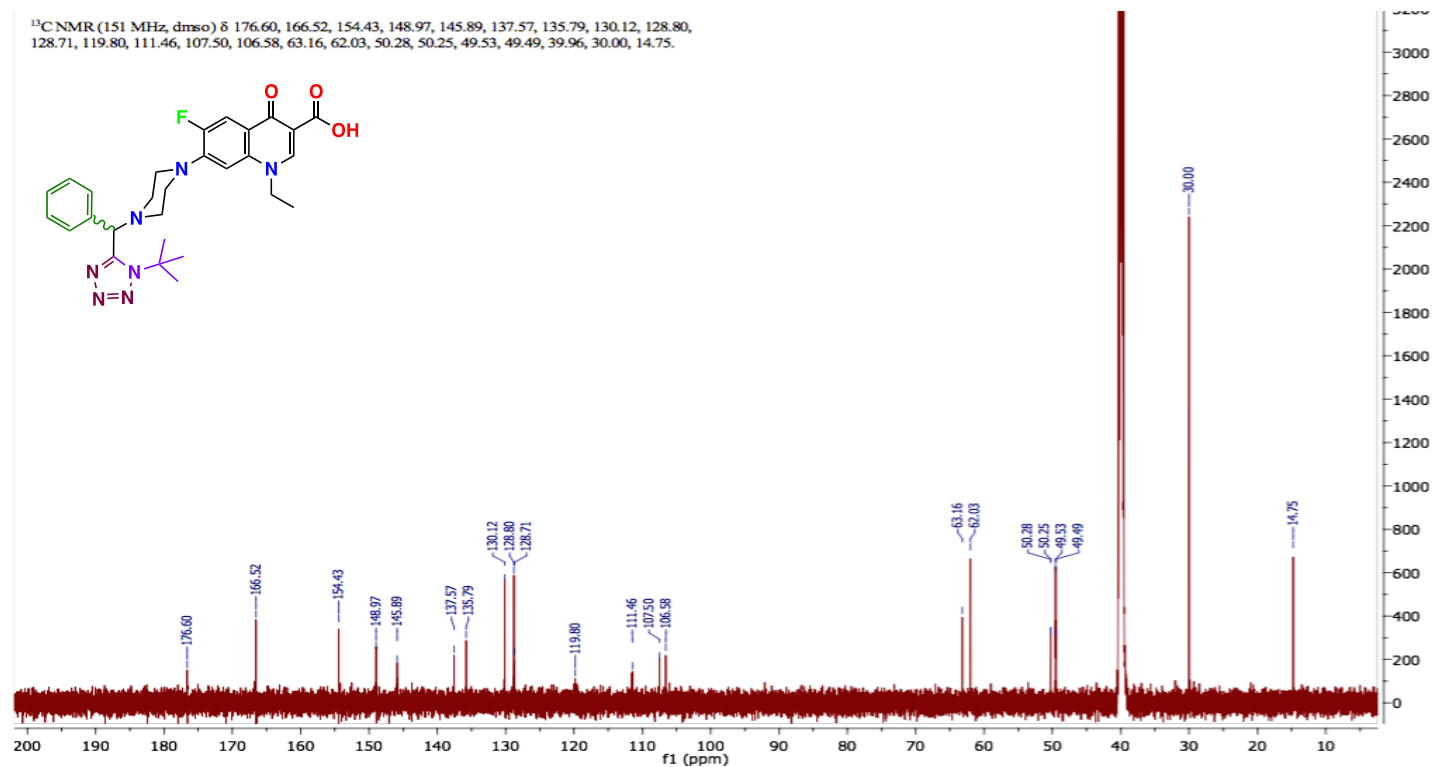

**Figure S32.** (*R/S*)-7-(4-((1-(*ter*-buthyl)-1*H*-tetrazol-5-yl)(phenyl)methyl)piperazin-1-yl)-1-ethyl-6-fluoro-4-oxo-1,4-dihydroquinoline-3-carboxylic acid **9**, **10**.

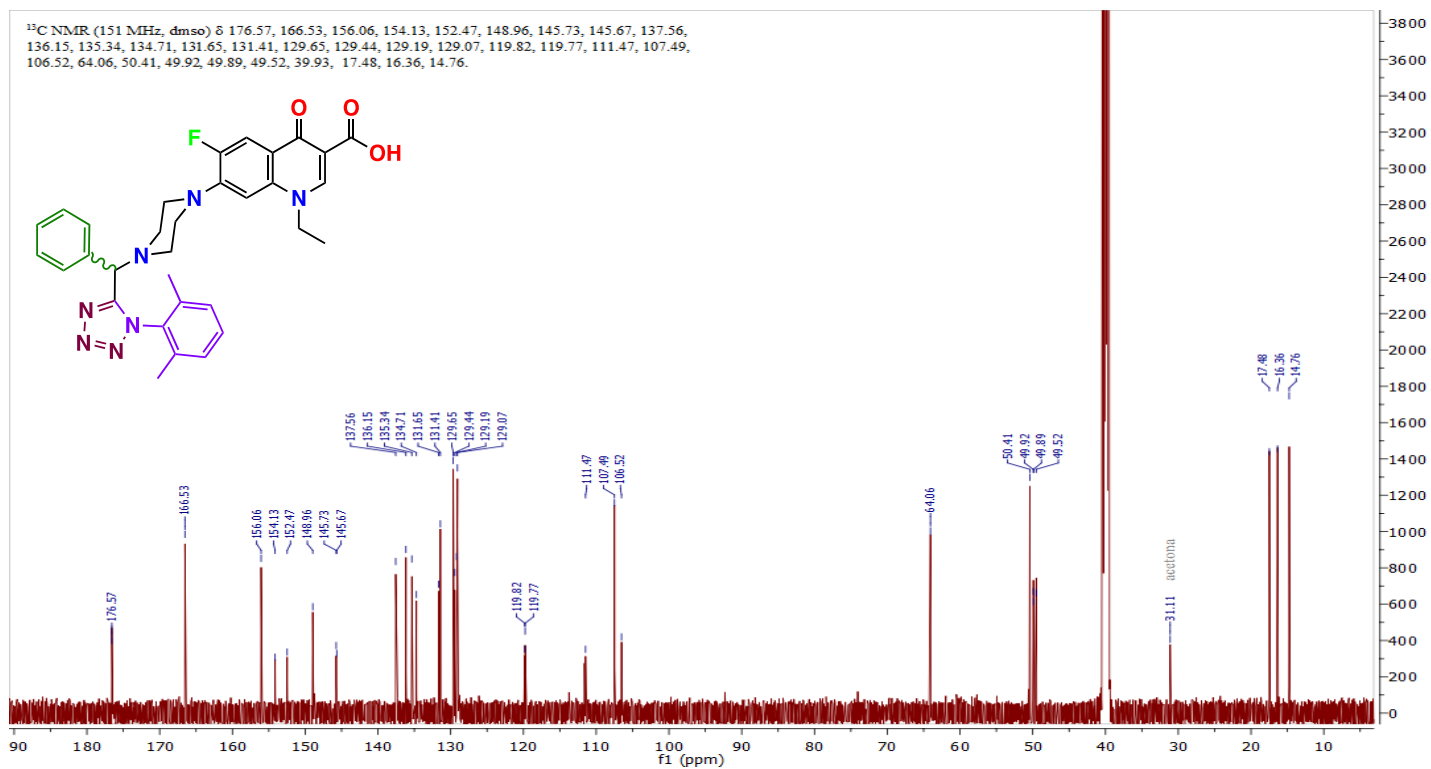

**Figure S33.** (*R/S*)-7-(4-((1-(2,6-dimethylphenyl)-1*H*-tetrazol-5-yl)(phenyl)methyl)piperazin-1-yl)-1-ethyl-6-fluoro-4-oxo-1,4-dihydroquinoline-3-carboxylic acid **11**, **12**.

## <sup>19</sup>F Resonance Magnetic Nuclear Spectroscopy Spectrum

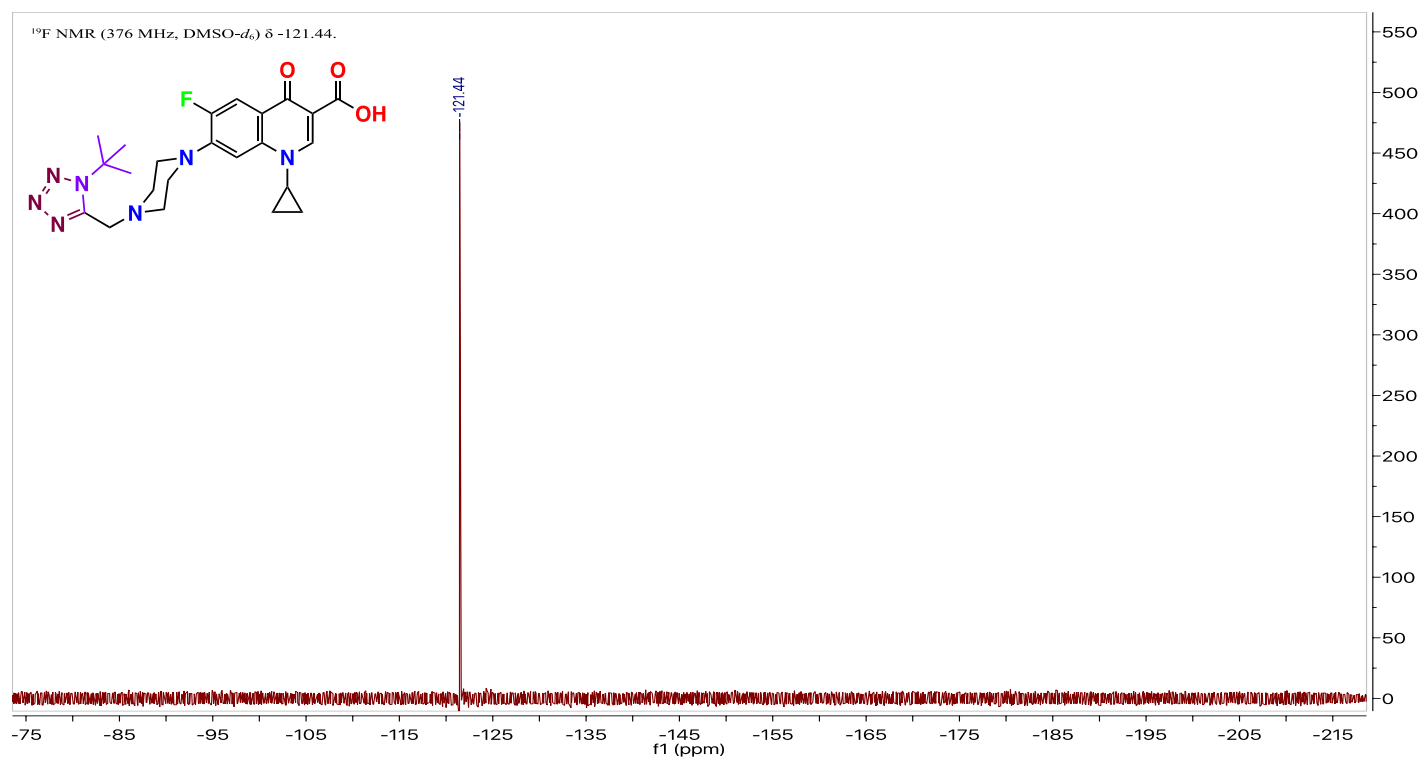

**Figure S34.** 7-(4-((1-*tert*-butyl)-1*H*-tetrazol-5-yl)methyl)piperazin-1-yl)-1-cyclopropyl-6-fluoro-4-oxo-1,4-dihydroquinoline-3-carboxylic acid **1**.

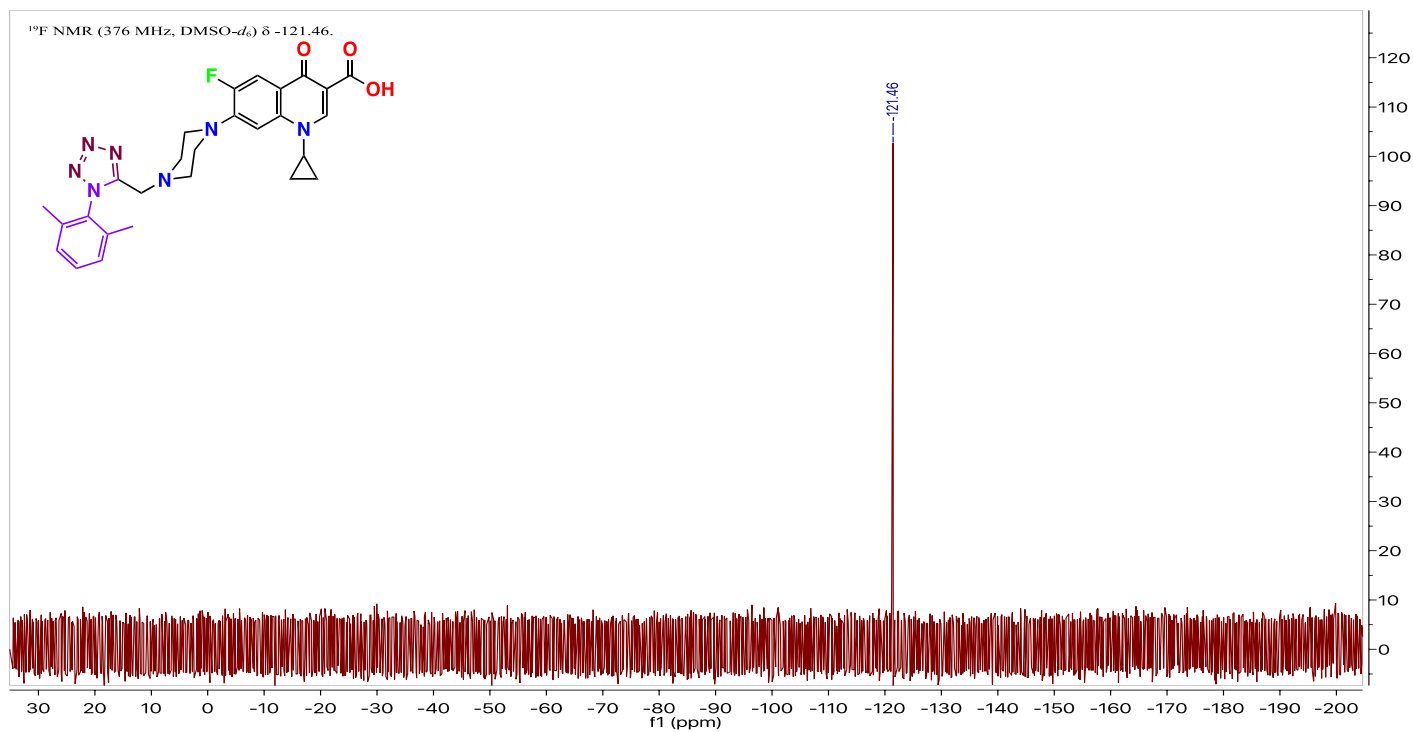

**Figure S35.** 1-cyclopropyl-7-(4-((1-(2,6-dimethylphenyl)-1*H*-tetrazol-5-yl)methyl)piperazin-1-yl)-6-fluoro-4-oxo-1,4-dihydroquinoline-3-carboxylic acid **2**.

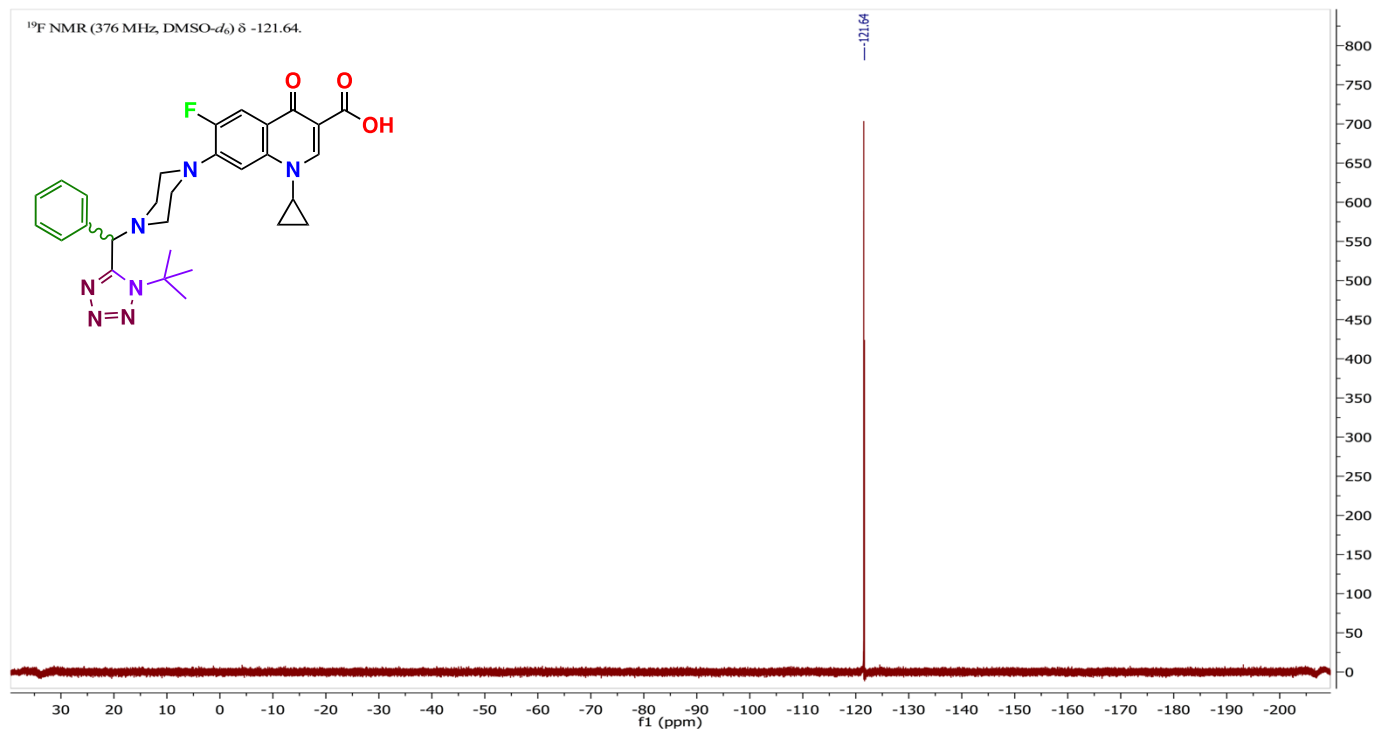

**Figure S36.** (*R/S*)-7-(4-((1-(*ter*-butyl)-1*H*-tetrazol-5-yl)(phenyl)methyl)piperazin-1-yl)-1-cyclopropyl-6-fluoro-4-oxo-1,4-dihydroquinoline-3-carboxylic acid **3, 4**.

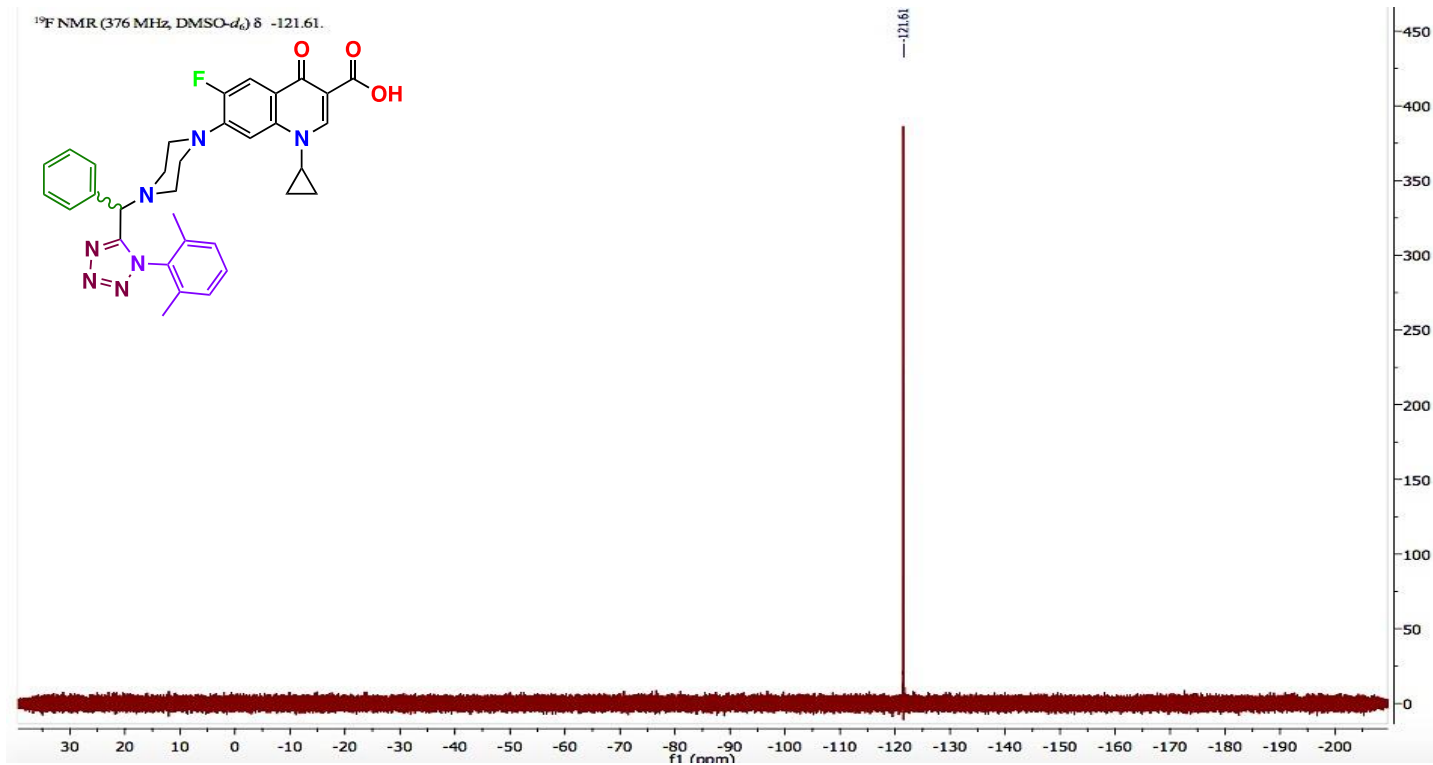

**Figure S37.** (*R/S*)-1-cyclopropyl-7-(4-((1-(2,6-dimethylphenyl)-1*H*-tetrazol-5-yl)(phenyl)methyl)piperazin-1-yl)-6-fluoro-4-oxo-1,4-dihydroquinoline-3-carboxylic acid **5, 6**.

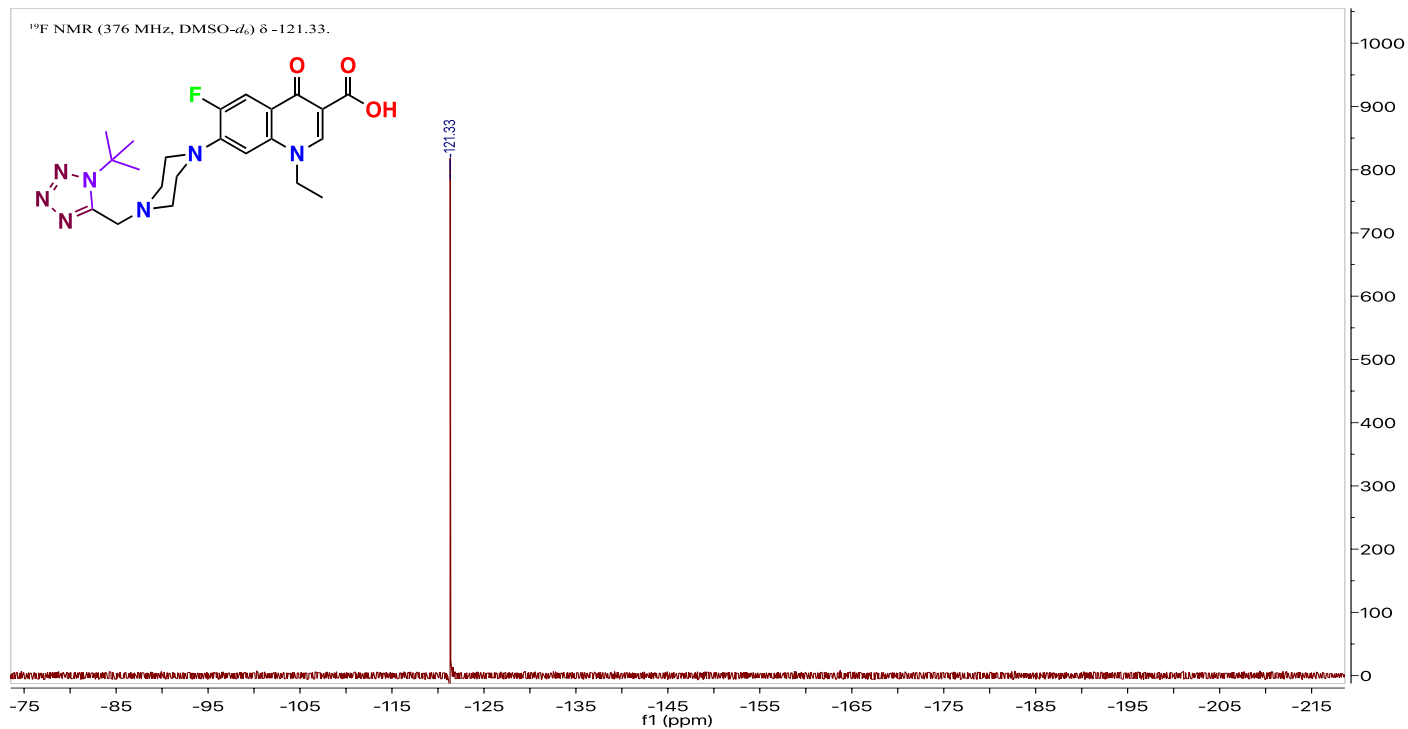

**Figure S38.** 7-(4-((1-(*tert*-butyl)-1*H*-tetrazol-5-yl)methyl)piperazin-1-yl)-1-ethyl-6-fluoro-4-oxo-1,4-dihydroquinoline-3-carboxylic acid **7**.

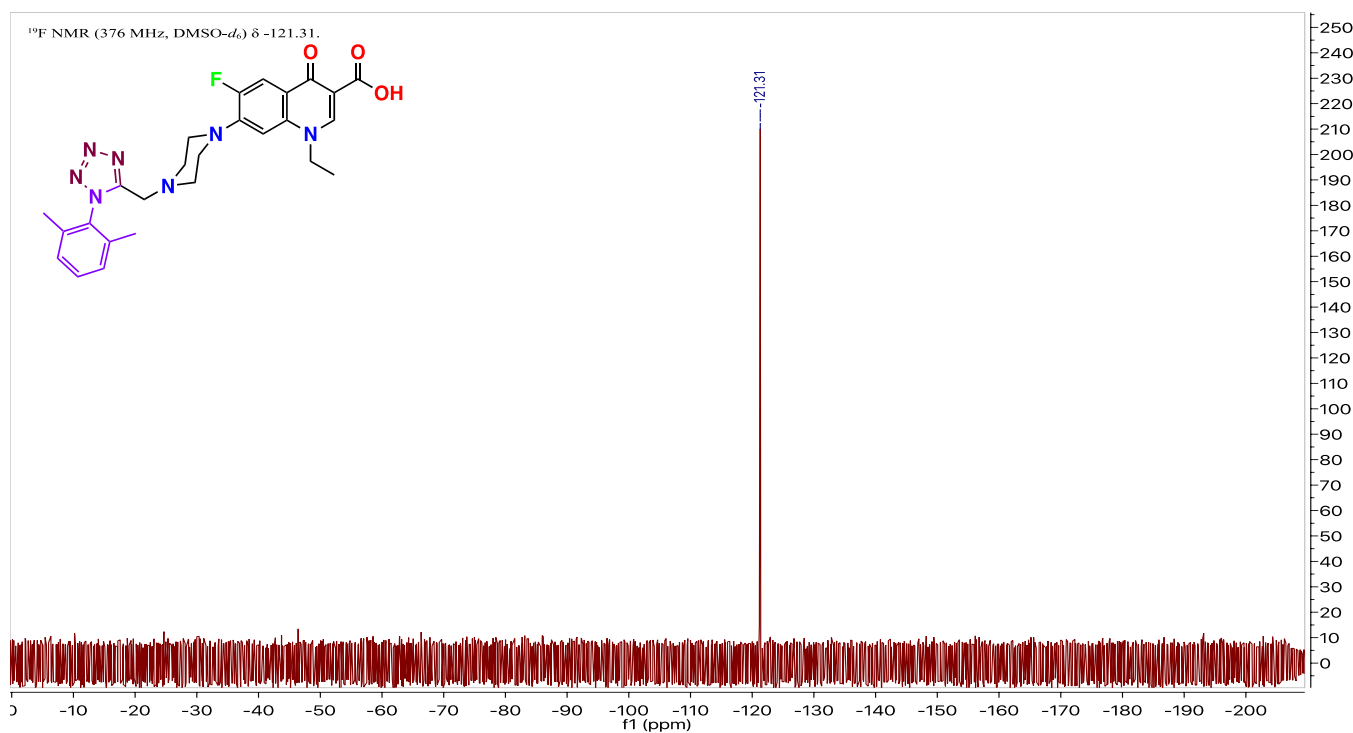

**Figure S39.** 7-(4-((1-(2,6-dimethylphenyl)-1*H*-tetrazol-5-yl)methyl)piperazin-1-yl)-1-ethyl-6-fluoro-4-oxo-1,4-dihydroquinoline-3-carboxylic acid **8**.

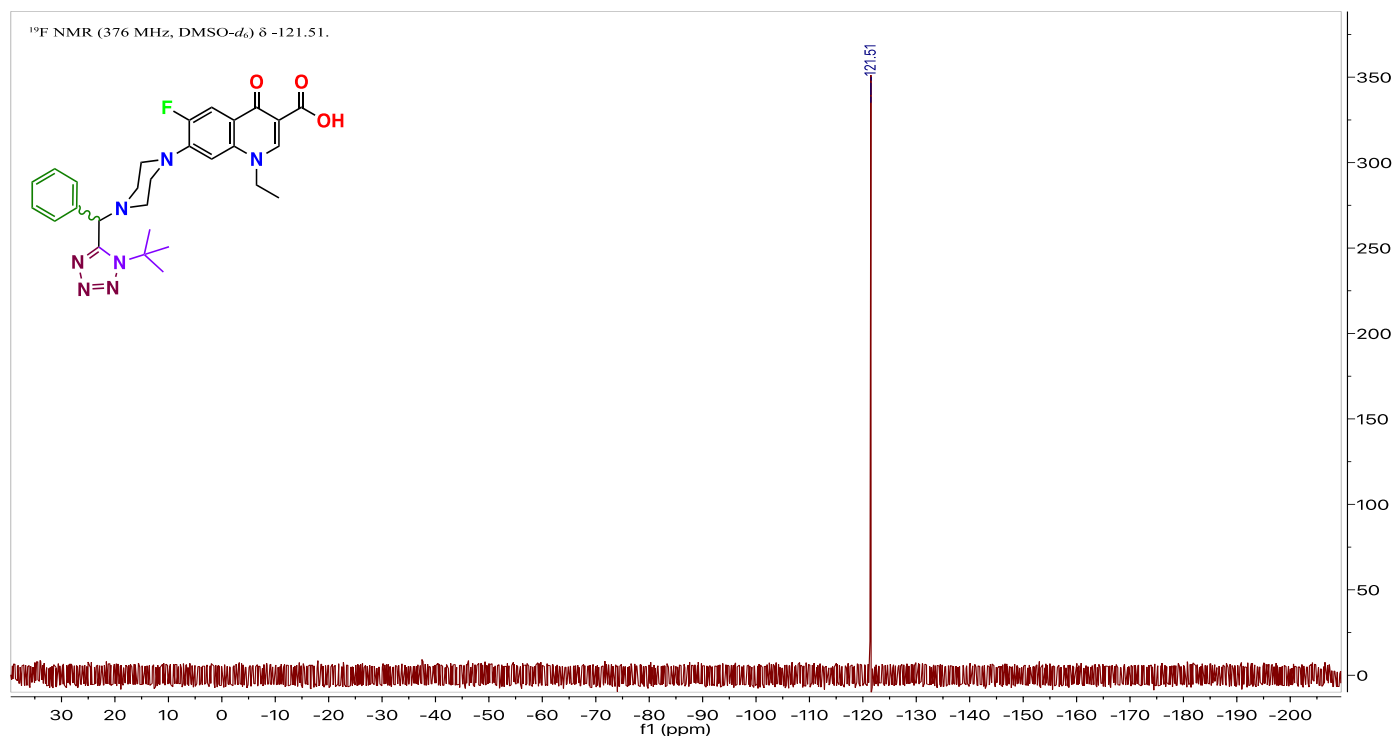

**Figure S40.** *(R/S)*-7-(4-((1-(*tert*-butyl)-1*H*-tetrazol-5-yl)(phenyl)methyl)piperazin-1-yl)-1-ethyl-6-fluoro-4-oxo-1,4-dihydroquinoline-3-carboxylic acid **9, 10**.

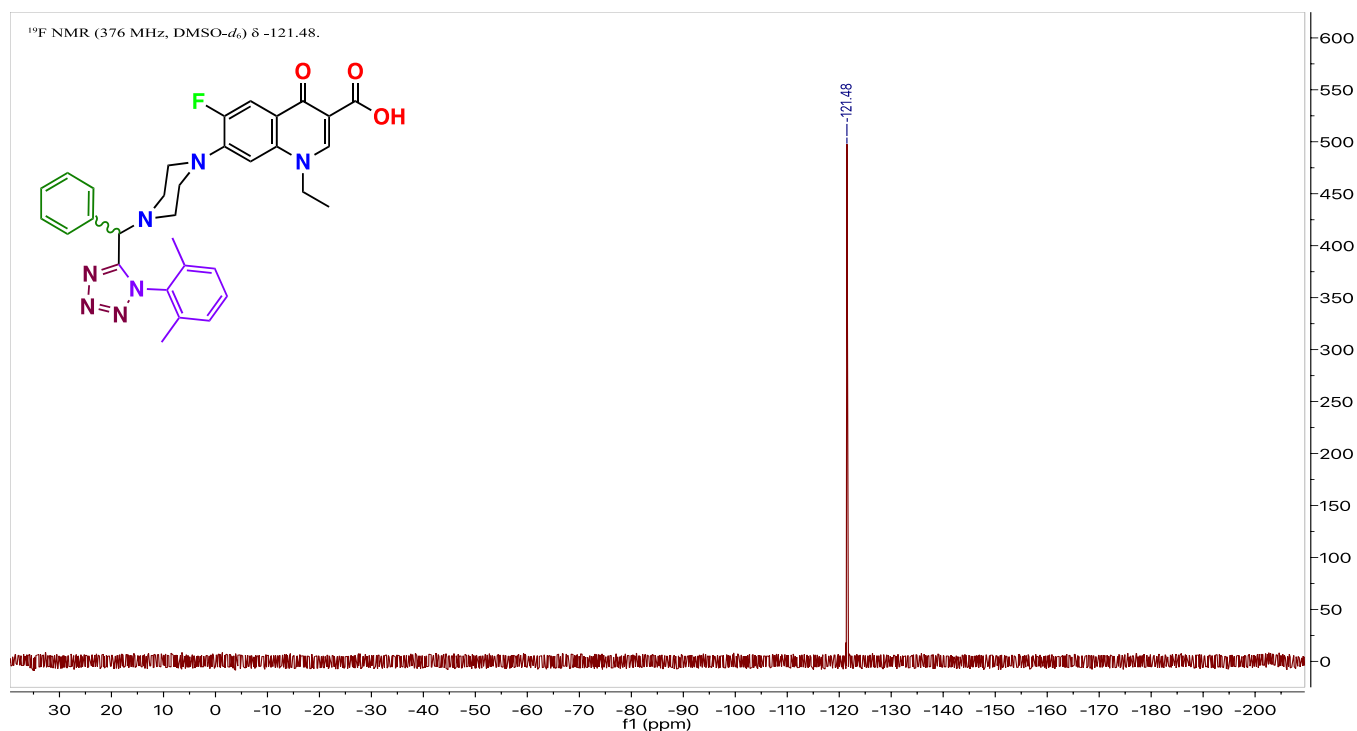

**Figure S41.** *(R/S)*-7-(4-((1-(2,6-dimethylphenyl)-1*H*-tetrazol-5-yl)(phenyl)methyl)piperazin-1-yl)-1-ethyl-6-fluoro-4-oxo-1,4-dihydroquinoline-3-carboxylic acid **11, 12**.

## Homonuclear Correlation Spectroscopy $^1\text{H}$ RMN (COSY) Spectrum

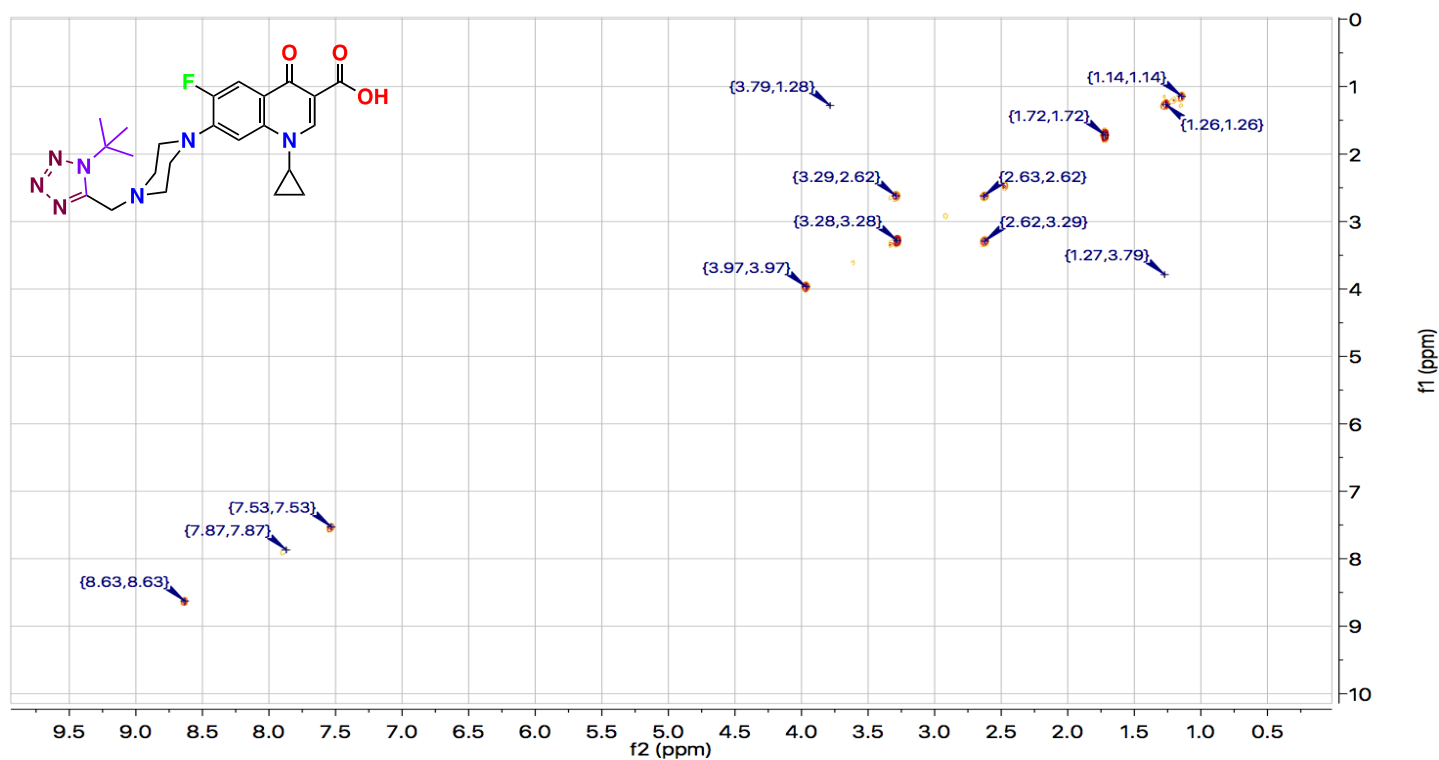

**Figure S42.** 7-(4-((1-(*ter*-butyl)-1*H*-tetrazol-5-yl)methyl)piperazin-1-yl)-1-cyclopropyl-6-fluoro-4-oxo-1,4-dihydroquinoline-3-carboxylic acid **1**.

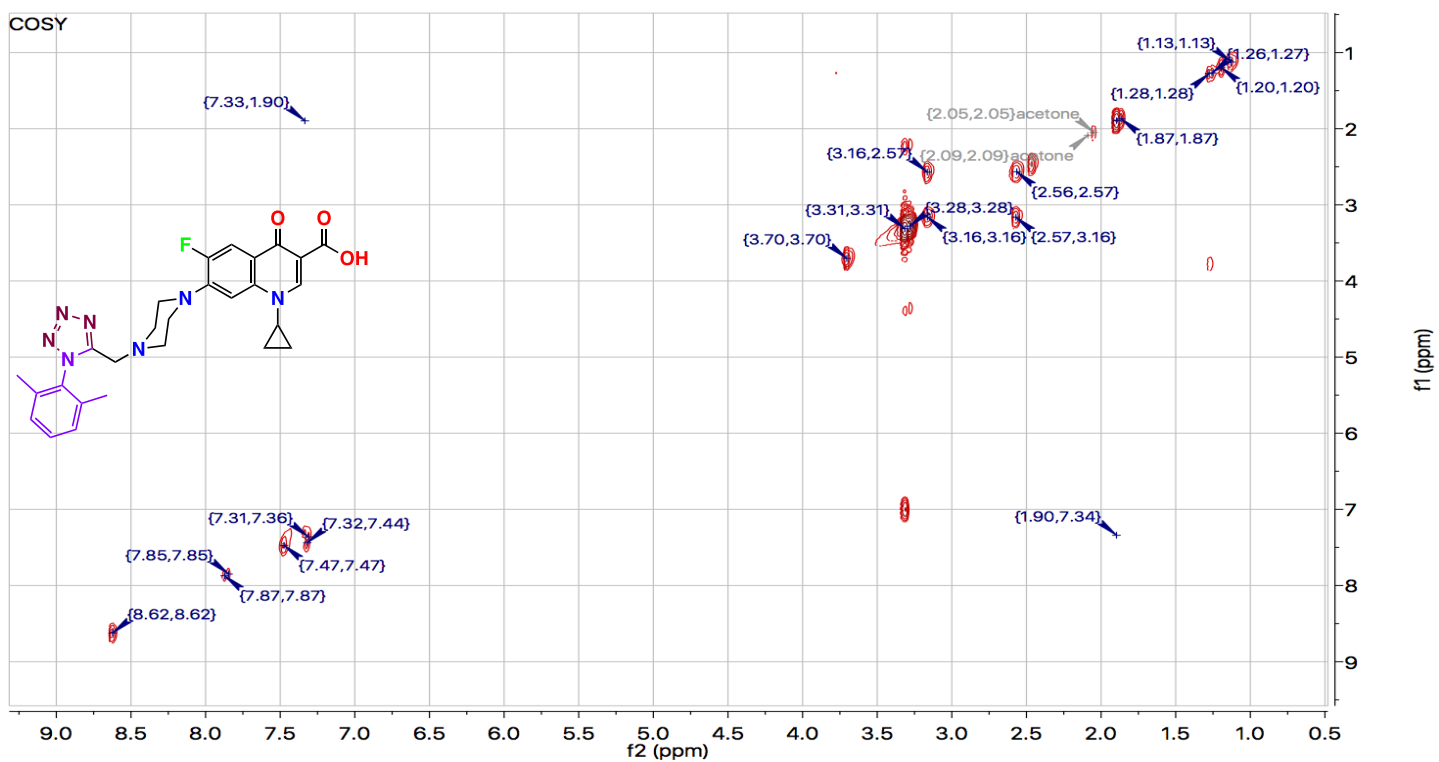

**Figure S43.** 1-cyclopropyl-7-(4-((1-(2,6-dimethylphenyl)-1*H*-tetrazol-5-yl)methyl)piperazin-1-yl)-6-fluoro-4-oxo-1,4-dihydroquinoline-3-carboxylic acid **2**.

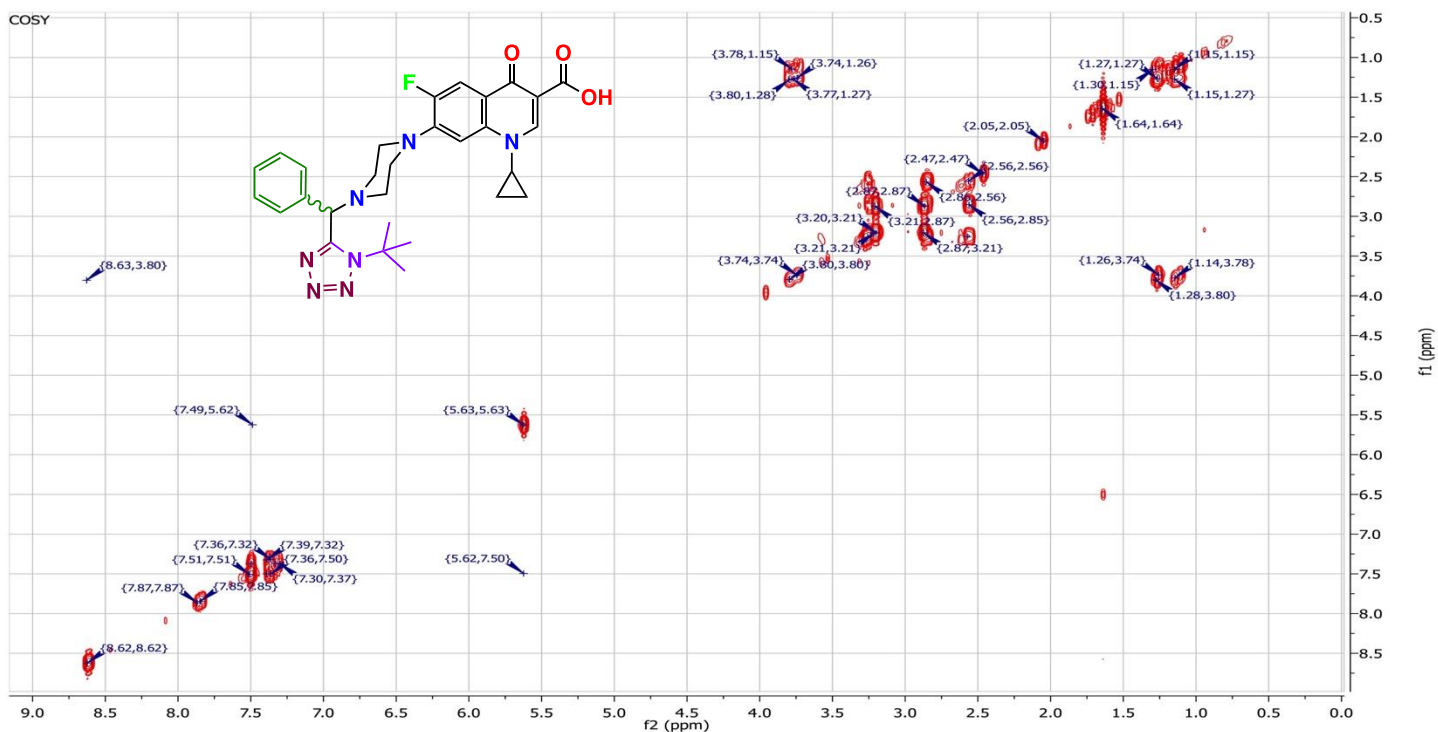

**Figure S44.** (R/S)-7-(4-((1-(*tert*-butyl)-1*H*-tetrazol-5-yl)(phenyl)methyl)piperazin-1-yl)-1-cyclopropyl-6-fluoro-4-oxo-1,4-dihydroquinoline-3-carboxylic acid **3, 4**.

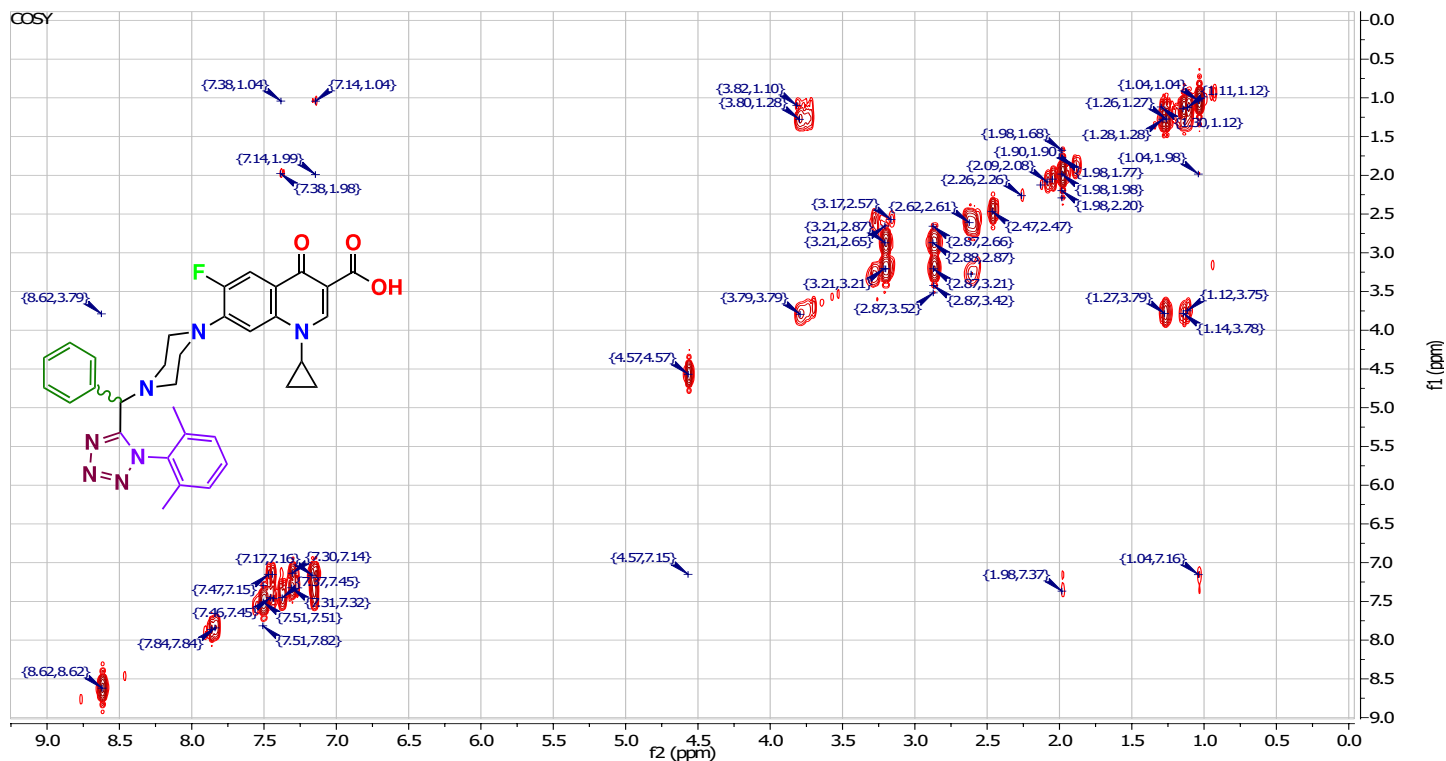

**Figure S45.** (R/S)-1-cyclopropyl-7-(4-((1-(2,6-dimethylphenyl)-1*H*-tetrazol-5-yl)(phenyl)methyl)piperazin-1-yl)-6-fluoro-4-oxo-1,4-dihydroquinoline-3-carboxylic acid **5, 6**.



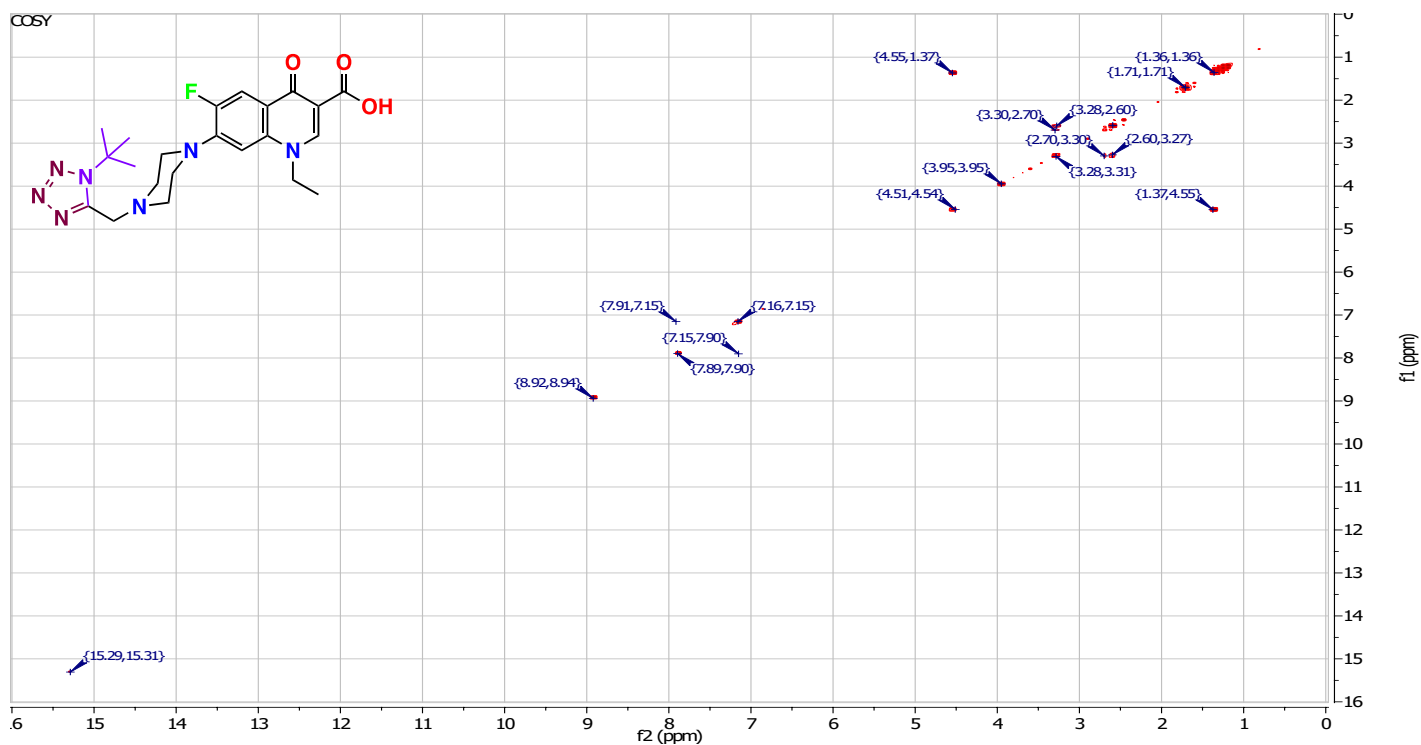

**Figure S46.** 7-(4-((1-(*ter*-buthyl)-1*H*-tetrazol-5-yl)methyl)piperazin-1-yl)-1-ethyl-6-fluoro-4-oxo-1,4-dihydroquinoline-3-carboxylic acid **7**.

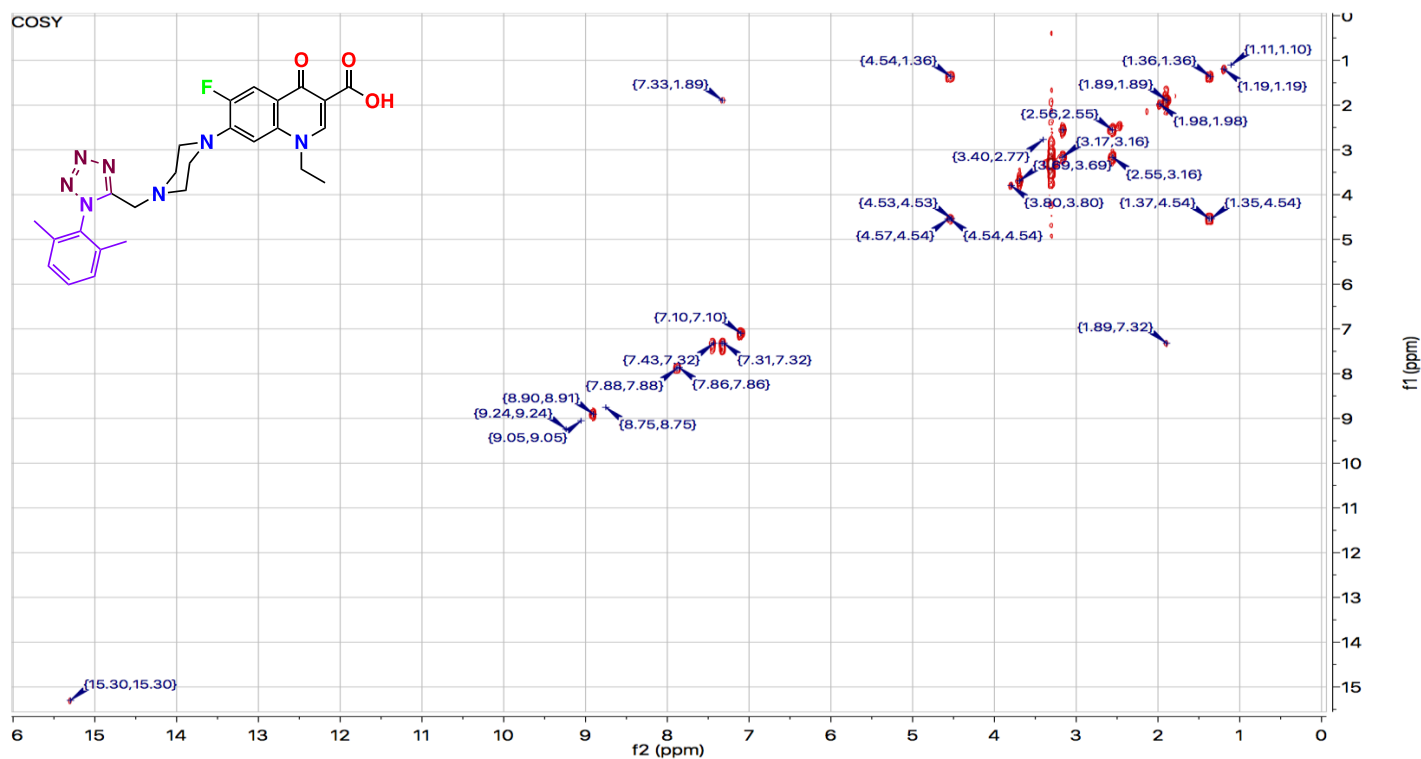

**Figure S47.** 7-(4-((1-(2,6-dimethylphenyl)-1*H*-tetrazol-5-yl)methyl)piperazin-1-yl)-1-ethyl-6-fluoro-4-oxo-1,4-dihydroquinoline-3-carboxylic acid **8**.

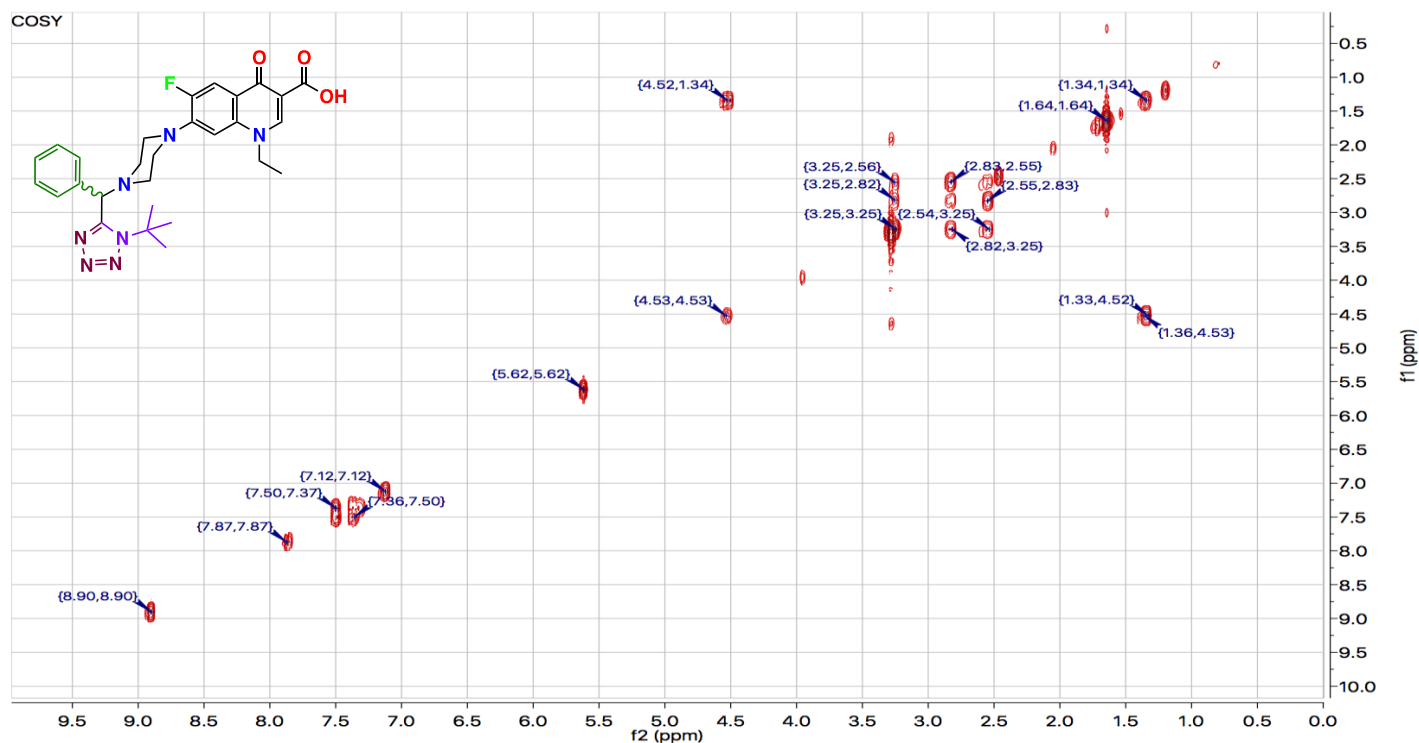

**Figure S48.** (*R/S*)-7-(4-((1-(*tert*-butyl)-1*H*-tetrazol-5-yl)(phenyl)methyl)piperazin-1-yl)-1-ethyl-6-fluoro-4-oxo-1,4-dihydroquinoline-3-carboxylic acid **9**, **10**.

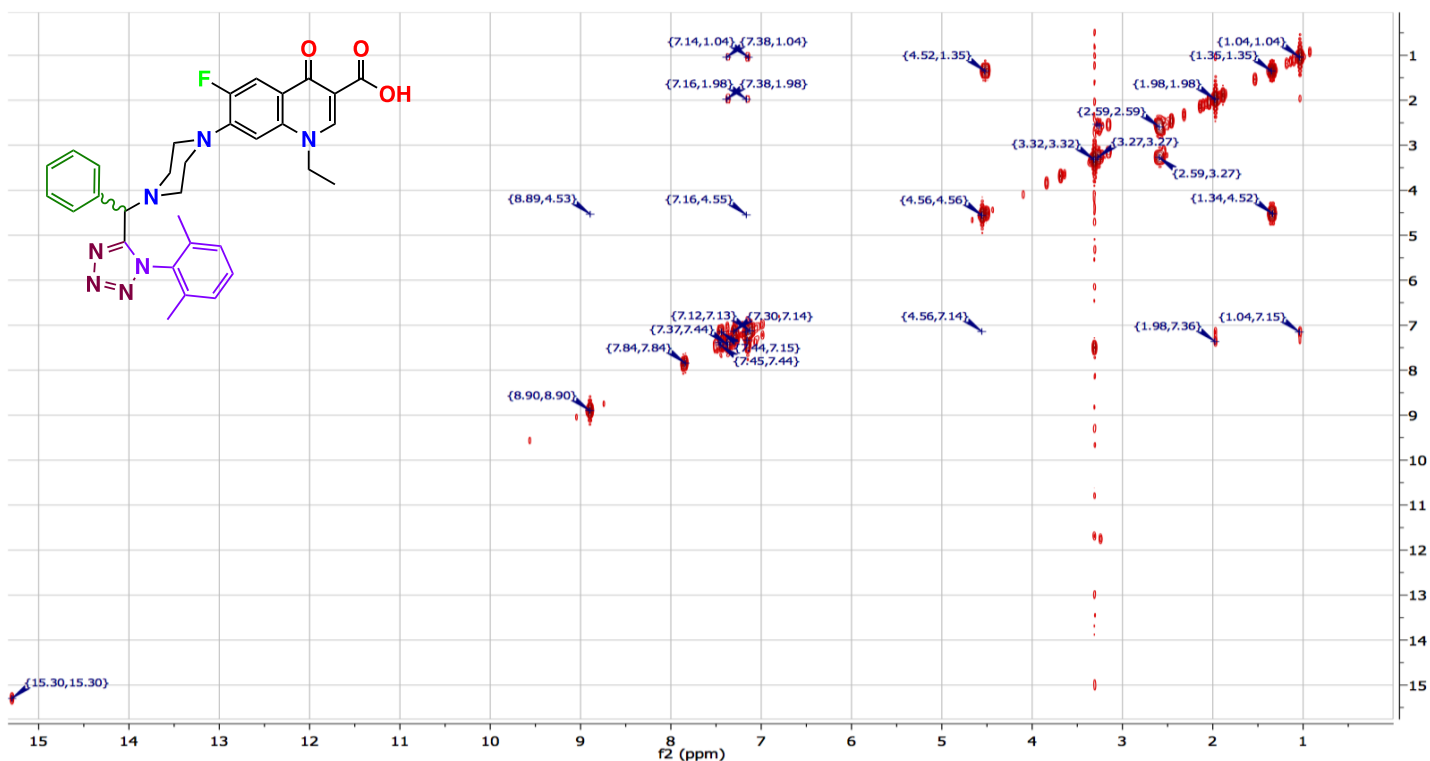

**Figure S49.** (*R/S*)-7-(4-((1-(2,6-dimethylphenyl)-1*H*-tetrazol-5-yl)(phenyl)methyl)piperazin-1-yl)-1-ethyl-6-fluoro-4-oxo-1,4-dihydroquinoline-3-carboxylic acid **11**, **12**.

## Heteronuclear Single-Quantum Correlation (HSQC) Spectroscopy Spectrum

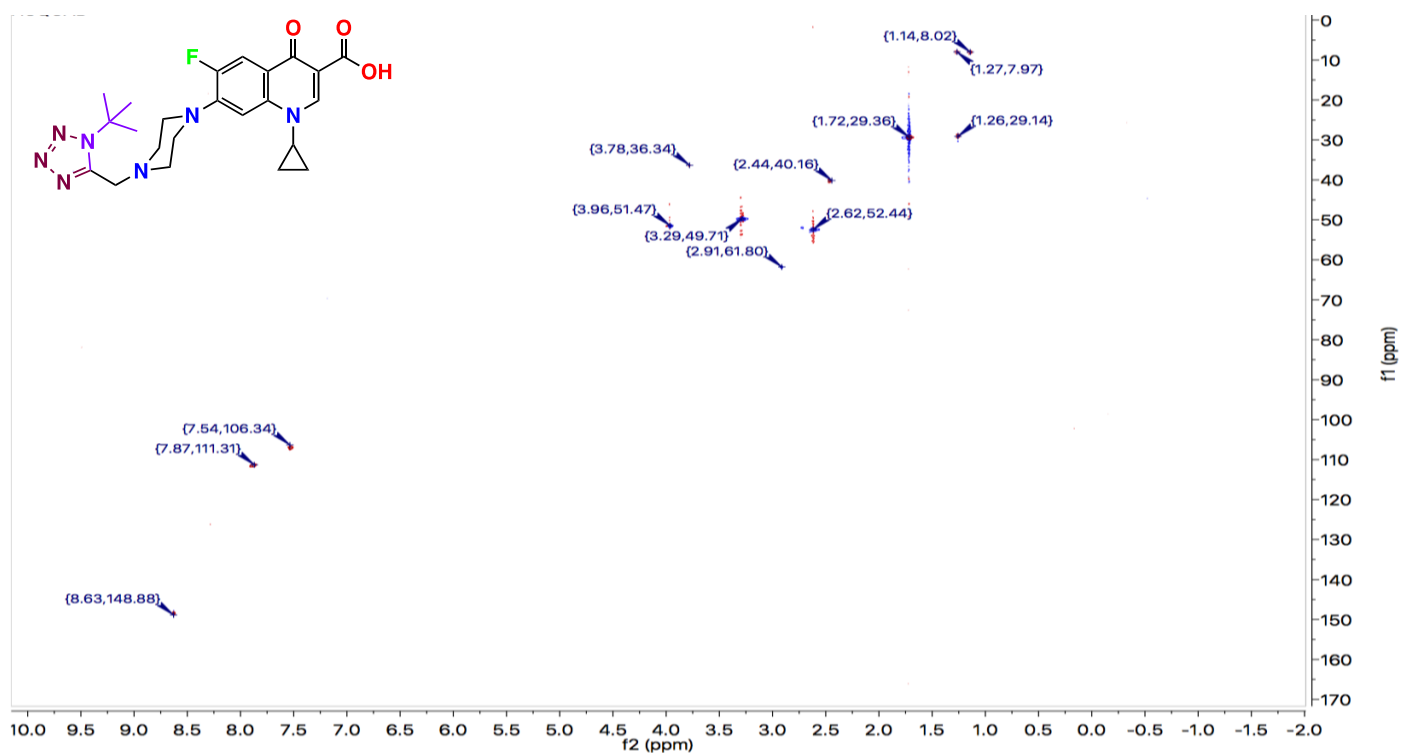

**Figure S50.** 7-(4-((1-(*tert*-butyl)-1*H*-tetrazol-5-yl)methyl)piperazin-1-yl)-1-cyclopropyl-6-fluoro-4-oxo-1,4-dihydroquinoline-3-carboxylic acid **1**.

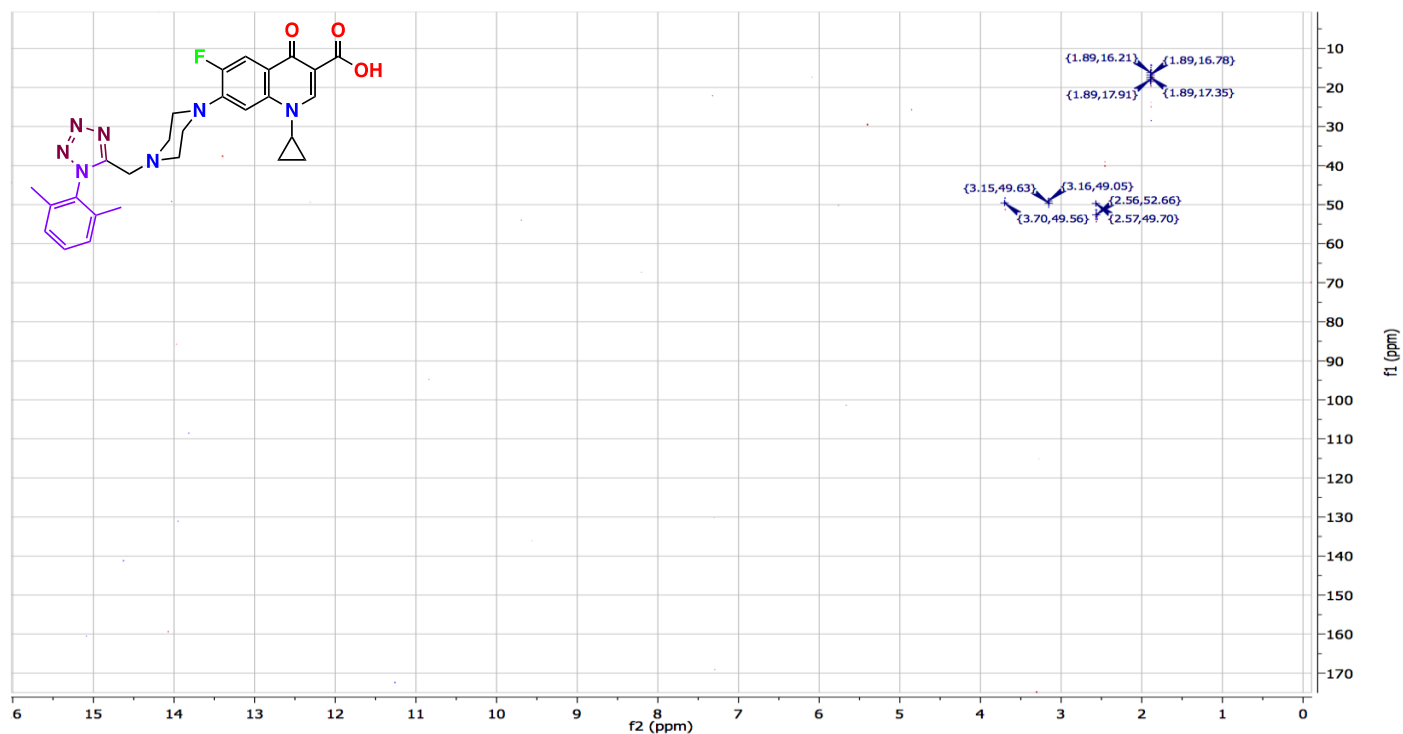

**Figure S51.** 1-cyclopropyl-7-(4-((1-(2,6-dimethylphenyl)-1*H*-tetrazol-5-yl)methyl)piperazin-1-yl)-6-fluoro-4-oxo-1,4-dihydroquinoline-3-carboxylic acid **2**.

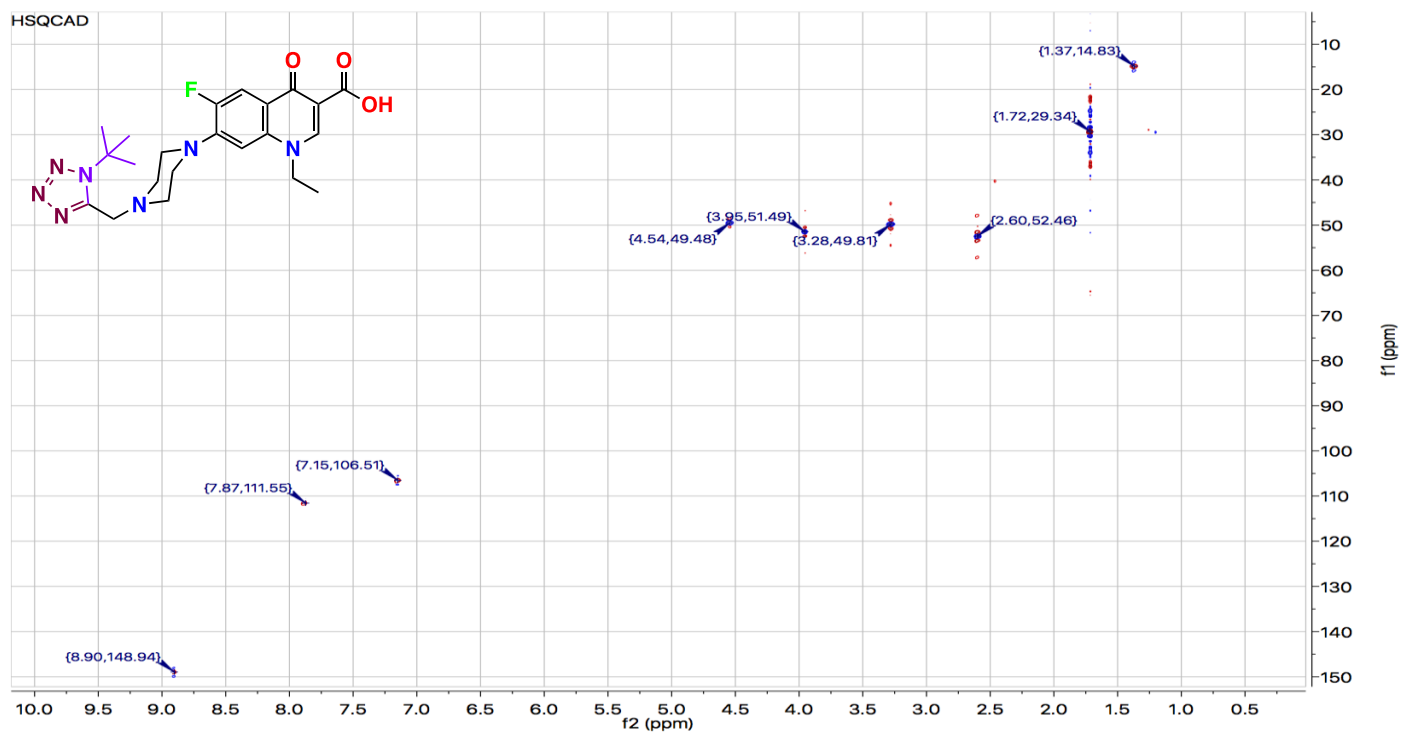

**Figure S52.** 7-(4-((1-(*ter*-butyl)-1*H*-tetrazol-5-yl)methyl)piperazin-1-yl)-1-ethyl-6-fluoro-4-oxo-1,4-dihydroquinoline-3-carboxylic acid **7**.

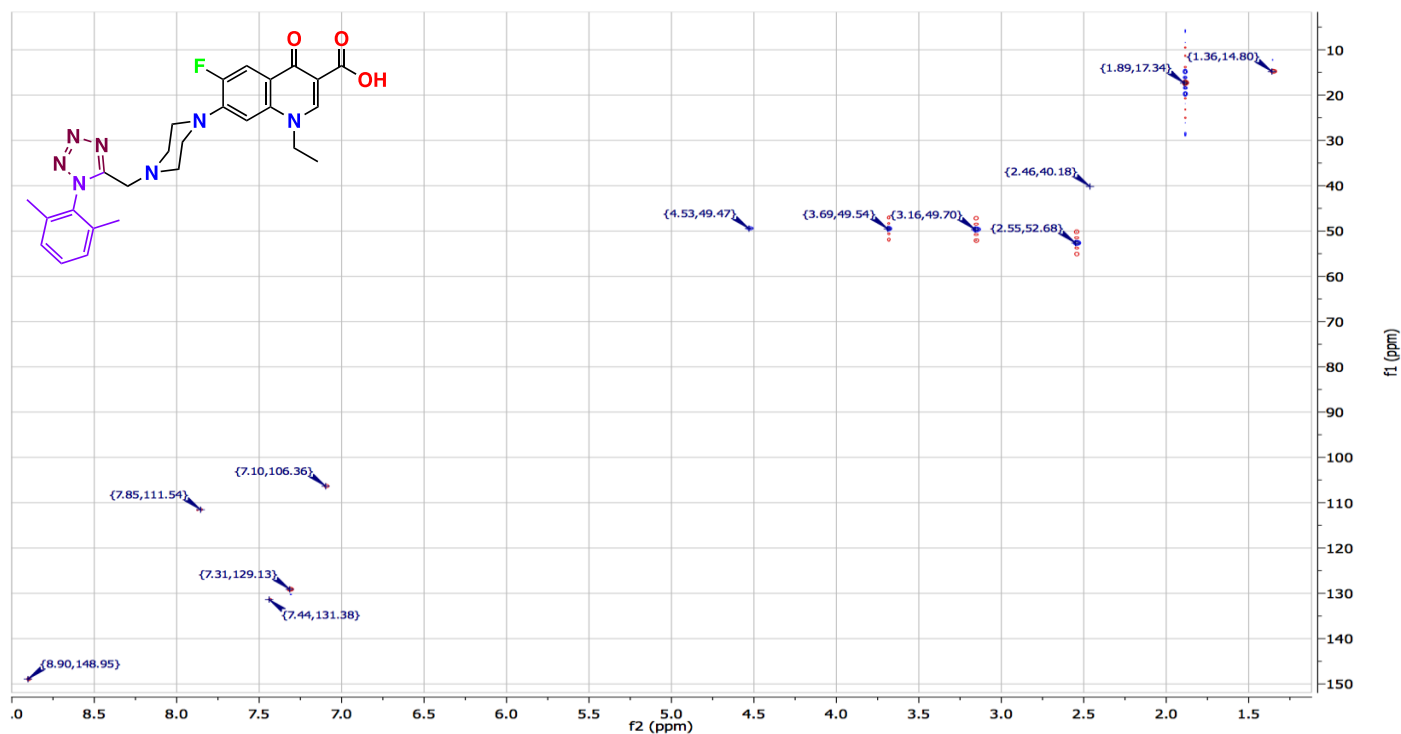

**Figure S53.** 7-(4-((1-(2,6-dimethylphenyl)-1*H*-tetrazol-5-yl)methyl)piperazin-1-yl)-1-ethyl-6-fluoro-4-oxo-1,4-dihydroquinoline-3-carboxylic acid **8**.

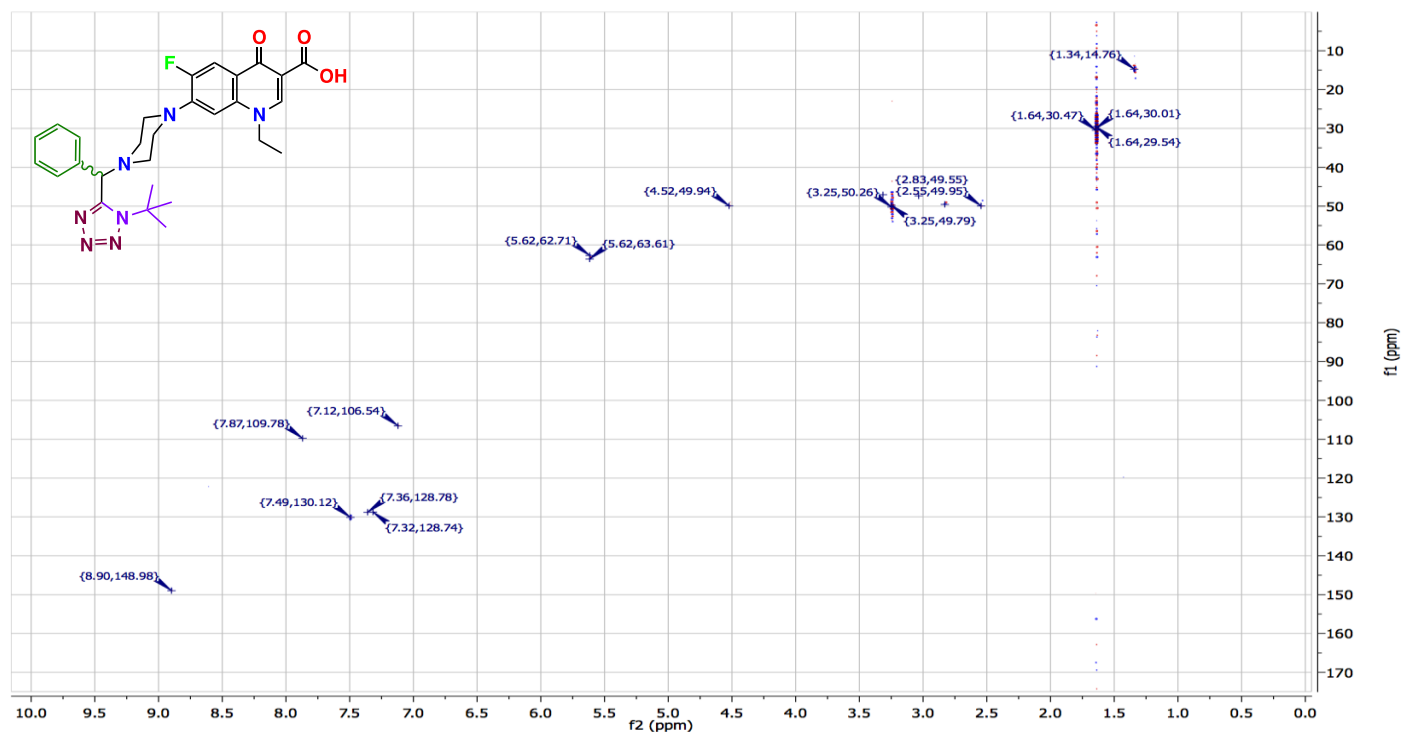

**Figure S54.** (R/S)-7-(4-((1-(*ter*-butyl)-1*H*-tetrazol-5-yl)(phenyl)methyl)piperazin-1-yl)-1-ethyl-6-fluoro-4-oxo-1,4-dihydroquinoline-3-carboxylic acid **9, 10**.

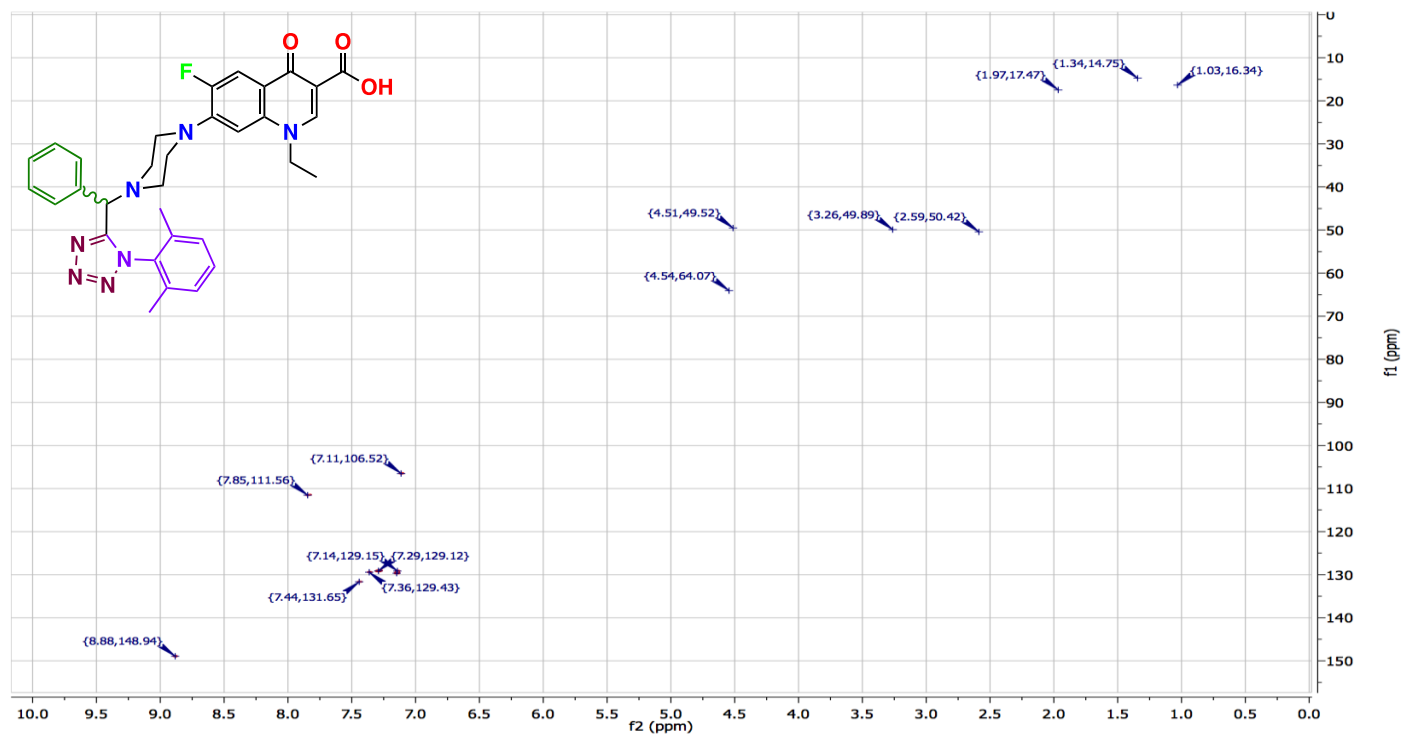

**Figure S55.** (R/S)-7-(4-((1-(2,6-dimethylphenyl)-1*H*-tetrazol-5-yl)(phenyl)methyl)piperazin-1-yl)-1-ethyl-6-fluoro-4-oxo-1,4-dihydroquinoline-3-carboxylic acid **11, 12**.

## Heteronuclear Multiple-Bond Correlation (HMBC) Spectroscopy Spectrum

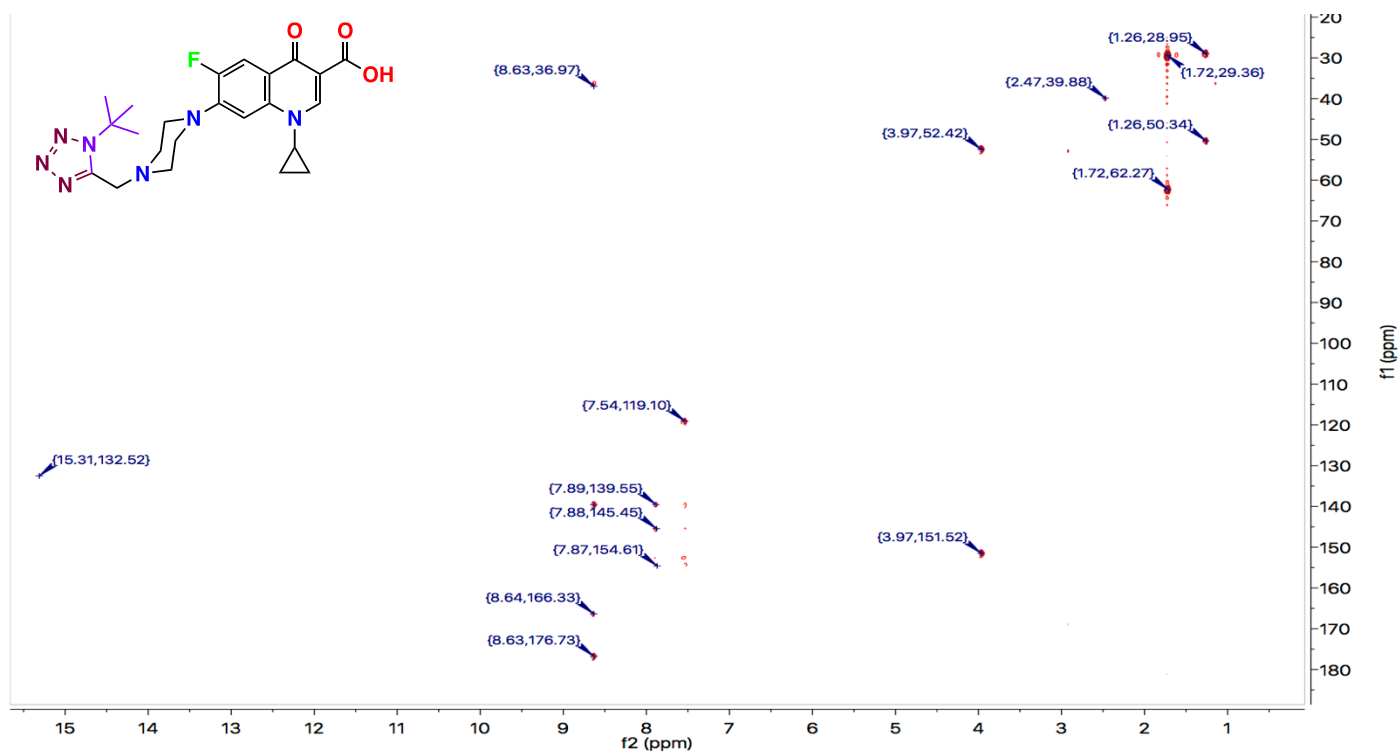

**Figure S56.** 7-(4-((1-(*ter*-buthyl)-1*H*-tetrazol-5-yl)methyl)piperazin-1-yl)-1-cyclopropyl-6-fluoro-4-oxo-1,4-dihydroquinoline-3-carboxylic acid **1**.

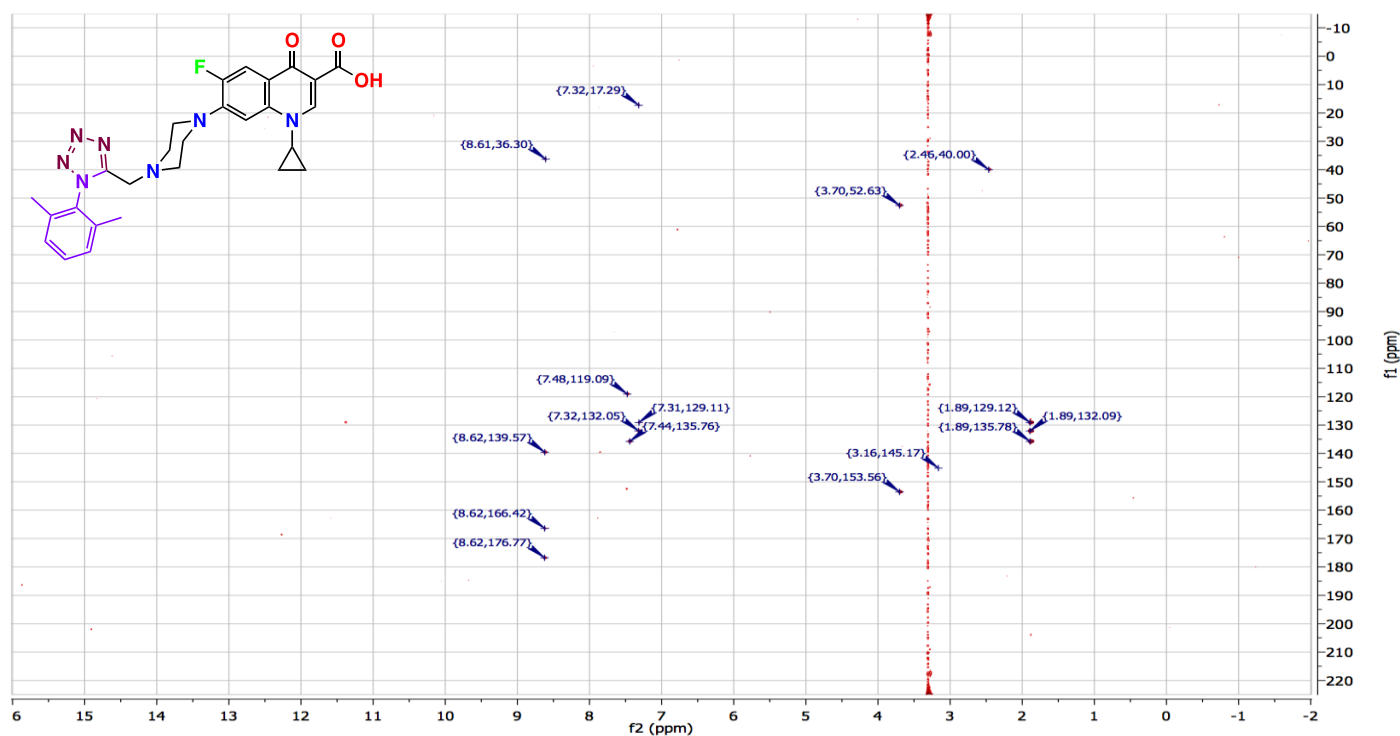

**Figure S57.** 1-cyclopropyl-7-(4-((1-(2,6-dimethylphenyl)-1*H*-tetrazol-5-yl)methyl)piperazin-1-yl)-6-fluoro-4-oxo-1,4-dihydroquinoline-3-carboxylic acid **2**.

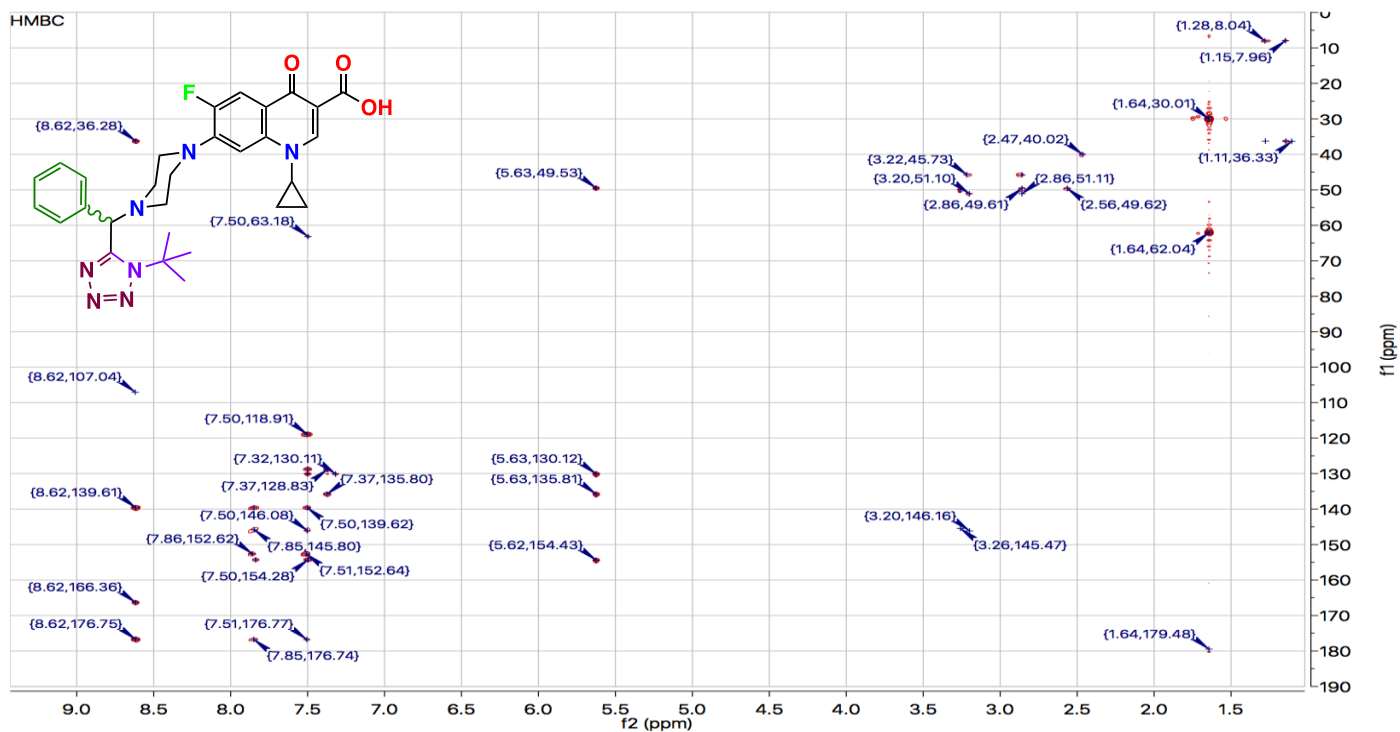

**Figure S58.** (R/S)-7-(4-((1-(*ter*-butyl)-1*H*-tetrazol-5-yl)(phenyl)methyl)piperazin-1-yl)-1-cyclopropyl-6-fluoro-4-oxo-1,4-dihydroquinoline-3-carboxylic acid **3, 4**.

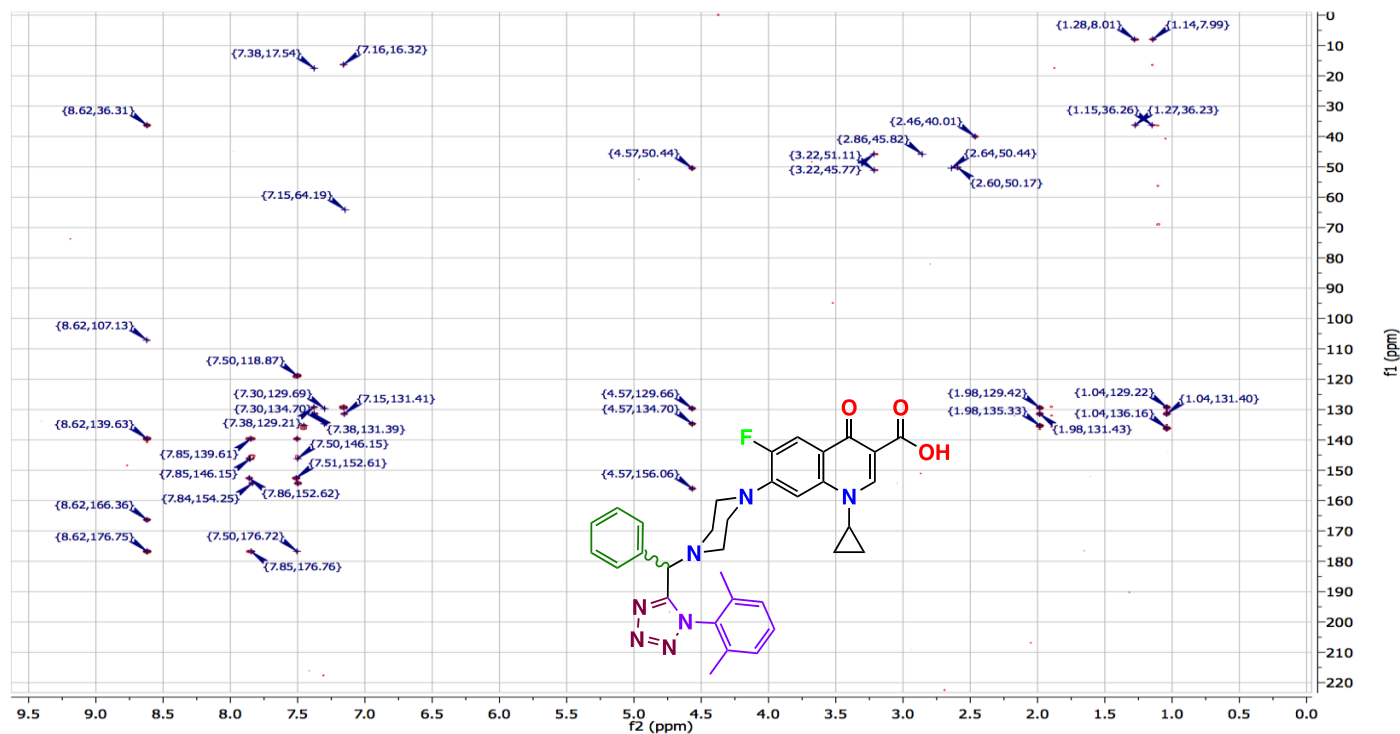

**Figure S59.** (R/S)-1-cyclopropyl-7-(4-((1-(2,6-dimethylphenyl)-1*H*-tetrazol-5-yl)(phenyl)methyl)piperazin-1-yl)-6-fluoro-4-oxo-1,4-dihydroquinoline-3-carboxylic acid **5, 6**.

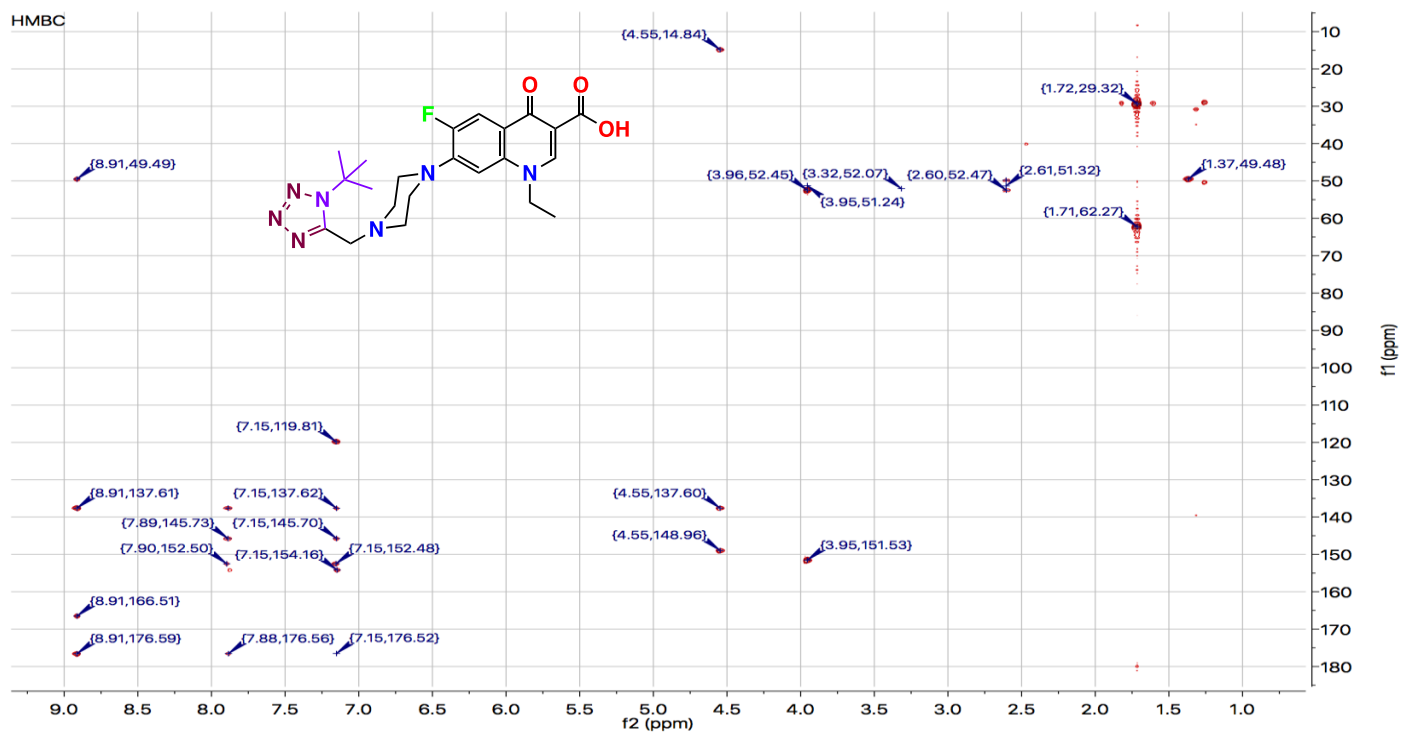

**Figure S60.** 7-(4-((1-(*ter*-butyl)-1*H*-tetrazol-5-yl)methyl)piperazin-1-yl)-1-ethyl-6-fluoro-4-oxo-1,4-dihydroquinoline-3-carboxylic acid **7**.

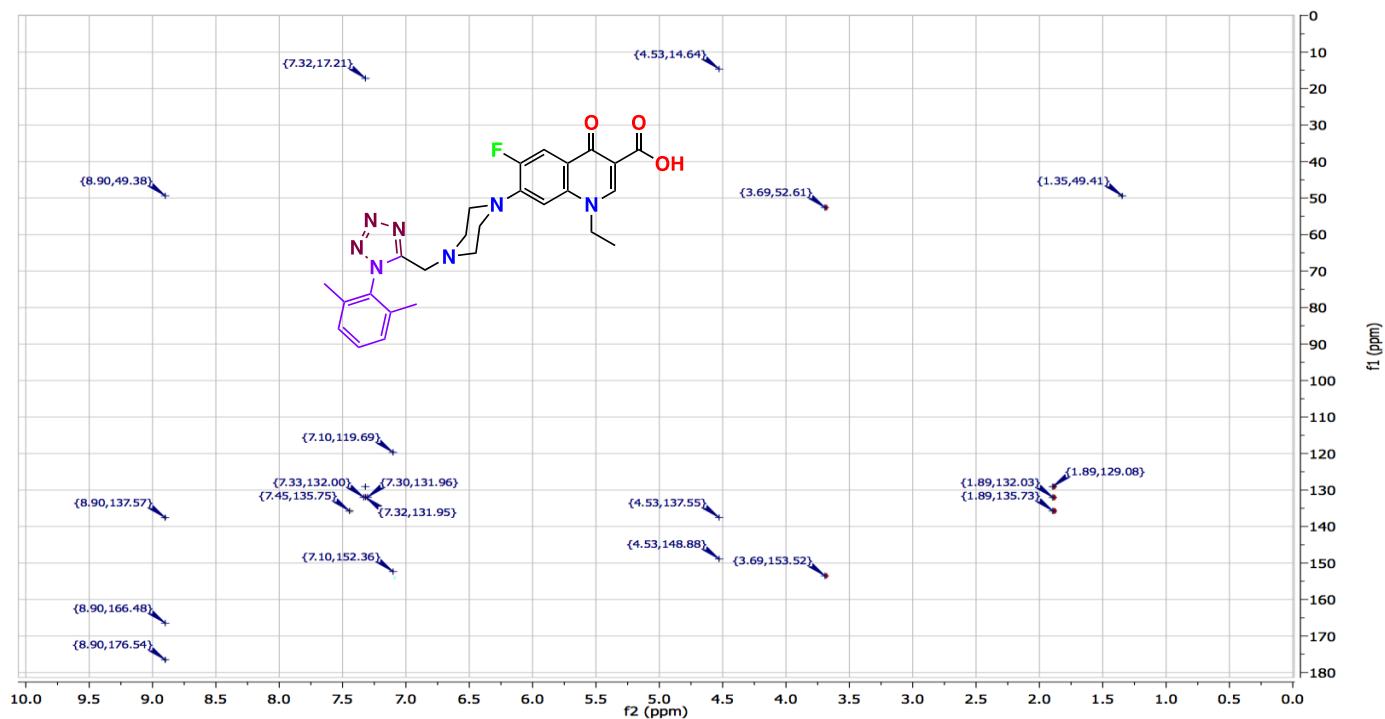

**Figure S61.** 7-(4-((1-(2,6-dimethylphenyl)-1*H*-tetrazol-5-yl)methyl)piperazin-1-yl)-1-ethyl-6-fluoro-4-oxo-1,4-dihydroquinoline-3-carboxylic acid **8**.



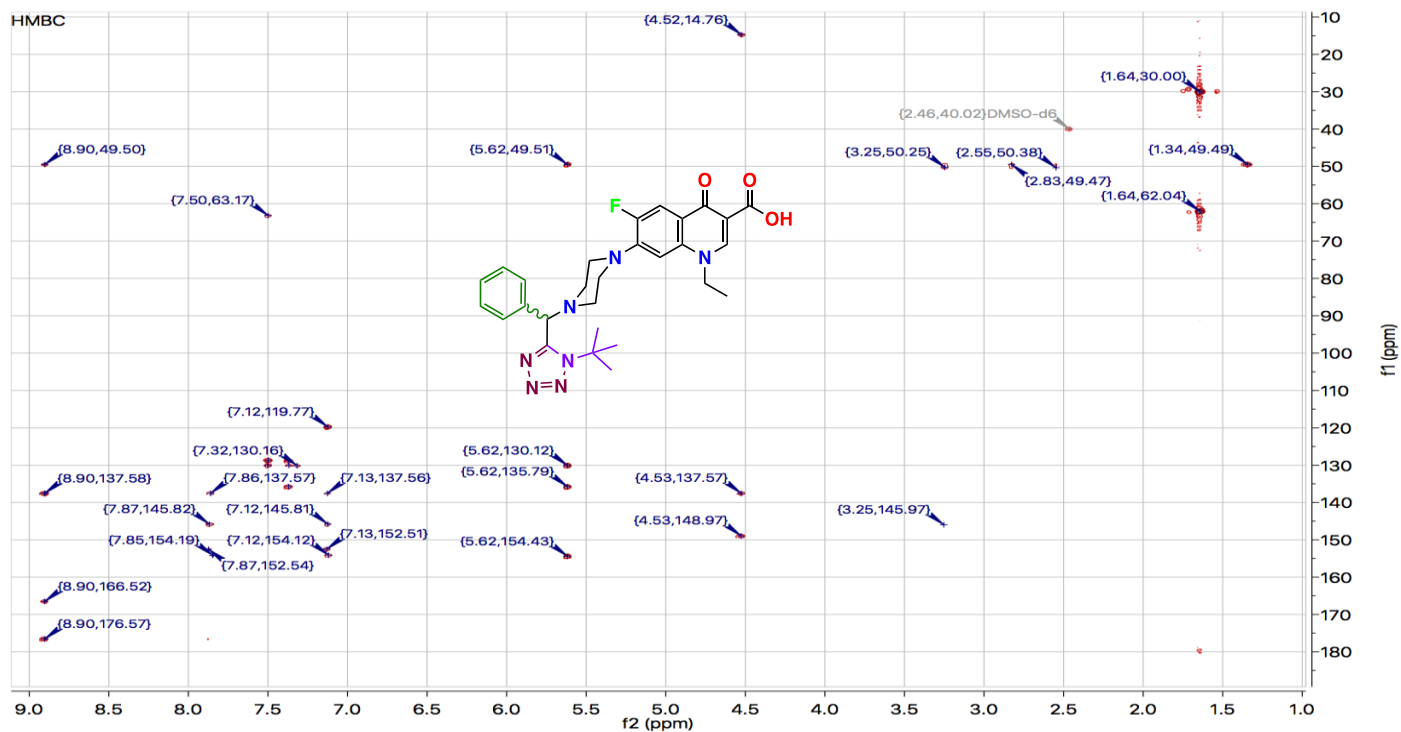

**Figure S62.** (*R/S*)-7-(4-((1-(*ter*-buthyl)-1*H*-tetrazol-5-yl)(phenyl)methyl)piperazin-1-yl)-1-ethyl-6-fluoro-4-oxo-1,4-dihydroquinoline-3-carboxylic acid **9**, **10**.

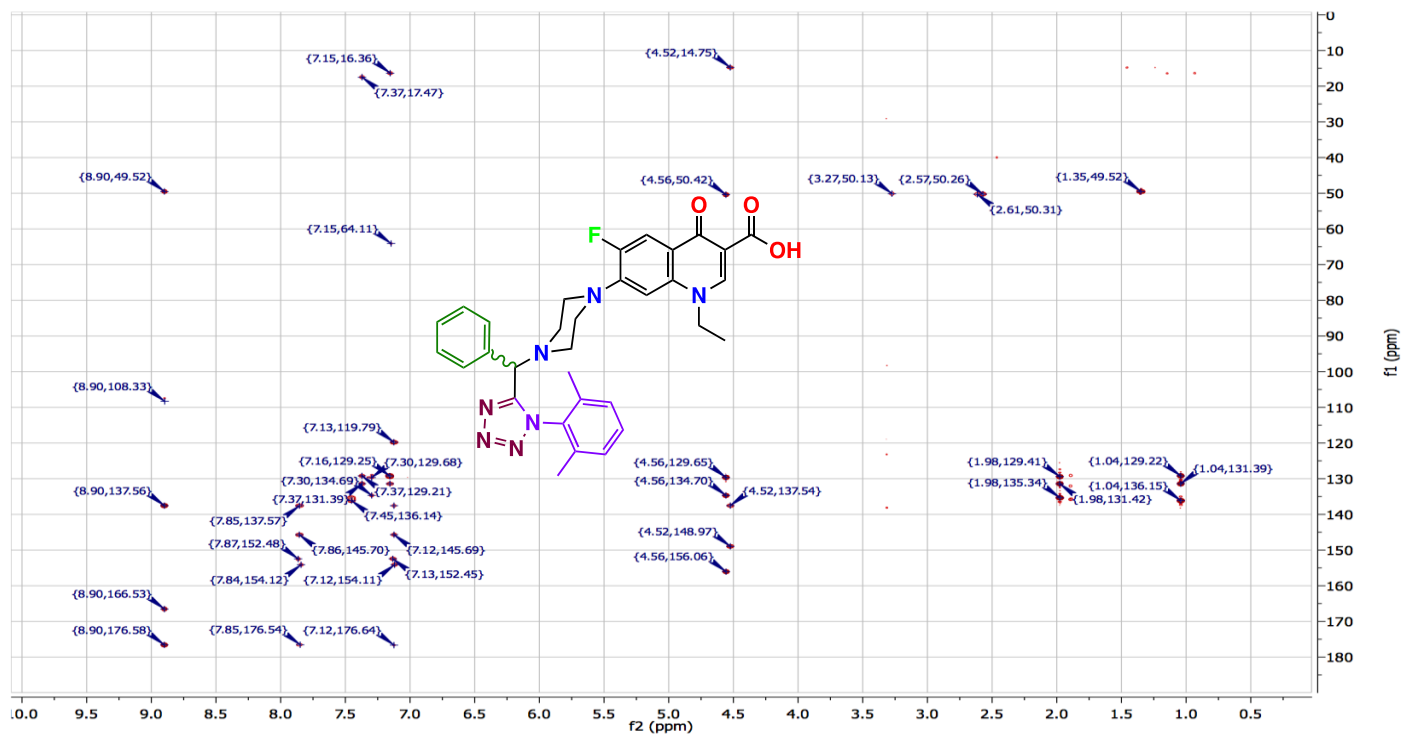

**Figure S63.** (*R/S*)-7-(4-((1-(2,6-dimethylphenyl)-1*H*-tetrazol-5-yl)(phenyl)methyl)piperazin-1-yl)-1-ethyl-6-fluoro-4-oxo-1,4-dihydroquinoline-3-carboxylic acid **11**, **12**.

## Electron-Ionization (EI-MS) and High-Resolution Mass Spectroscopy (HR-MS) Spectrum

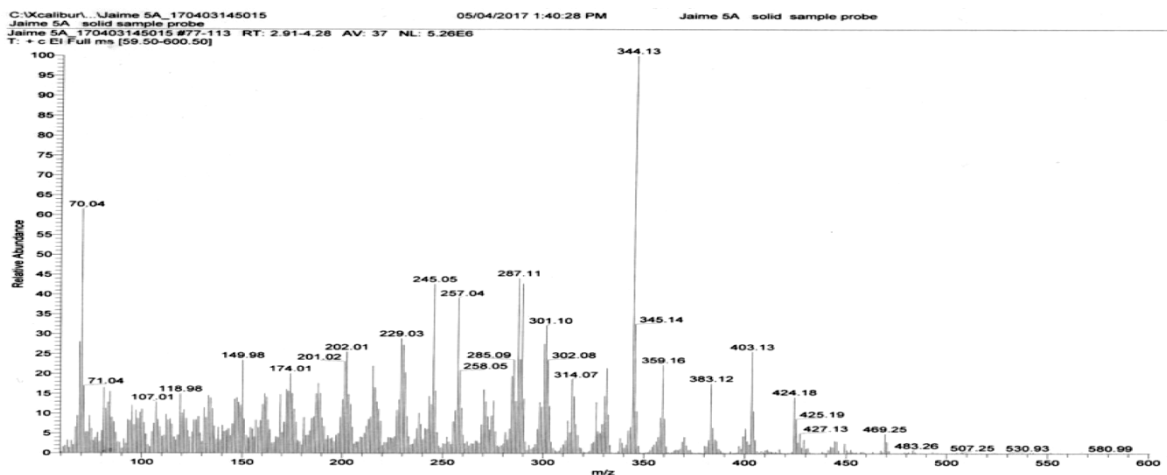

**Figure S64.** 7-(4-((1-(*ter*-buthyl)-1*H*-tetrazol-5-yl)methyl)piperazin-1-yl)-1-cyclopropyl-6-fluoro-4-oxo-1,4-dihydroquinoline-3-carboxylic acid **1**, EI-MS.

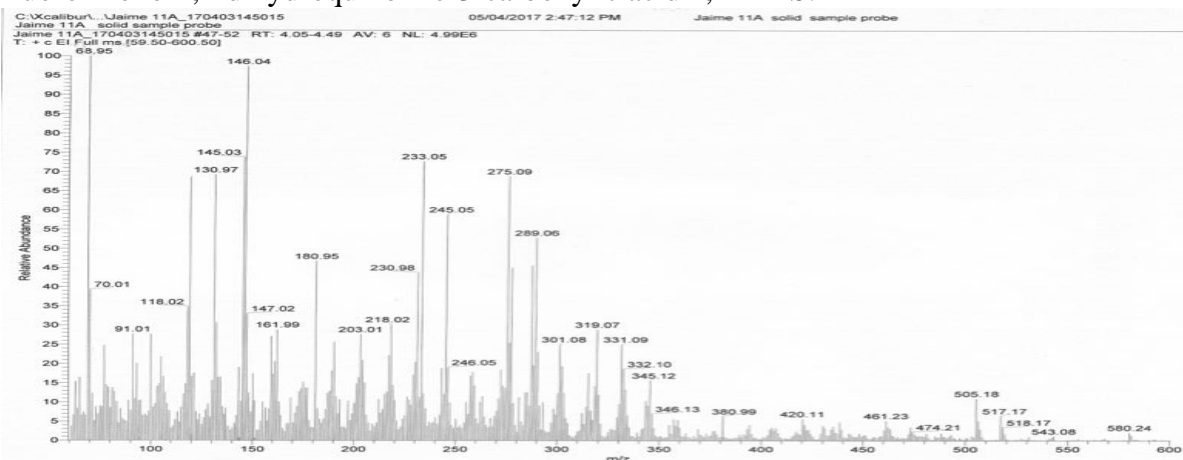

**Figure S65.** 1-cyclopropyl-7-(4-((1-(2,6-dimethylphenyl)-1*H*-tetrazol-5-yl)methyl)piperazin-1-yl)-6-fluoro-4-oxo-1,4-dihydroquinoline-3-carboxylic acid **2**, EI-MS.

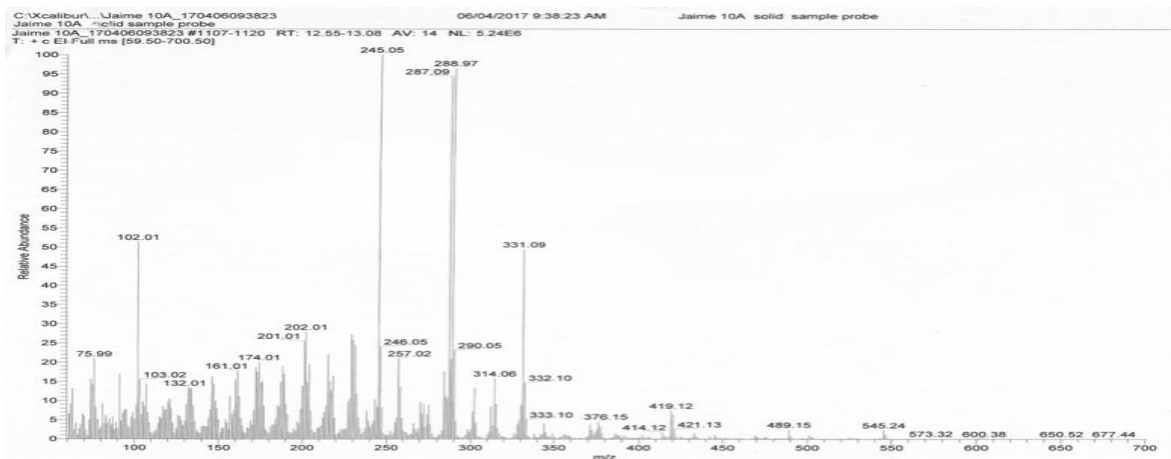

**Figure S66.** (*R/S*)-7-(4-((1-(*ter*-buthyl)-1*H*-tetrazol-5-yl)(phenyl)methyl)piperazin-1-yl)-1-cyclopropyl-6-fluoro-4-oxo-1,4-dihydroquinoline-3-carboxylic acid **3, 4**, EI-MS.

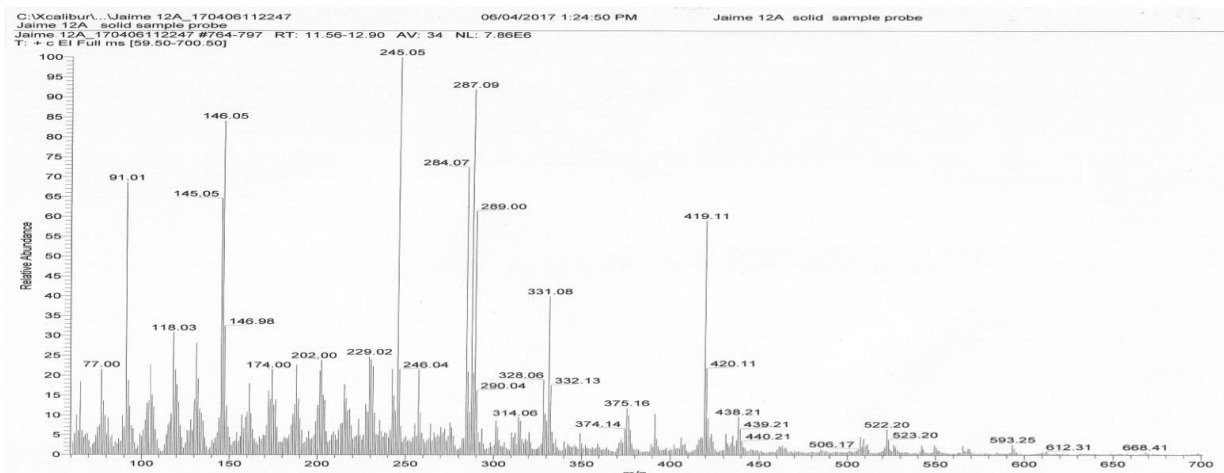

**Figure S67.** (*R/S*)-1-cyclopropyl-7-(4-((1-(2,6-dimethylphenyl)-1*H*-tetrazol-5-yl)(phenyl)methyl)piperazin-1-yl)-6-fluoro-4-oxo-1,4-dihydroquinoline-3-carboxylic acid **5, 6**, EI-MS.

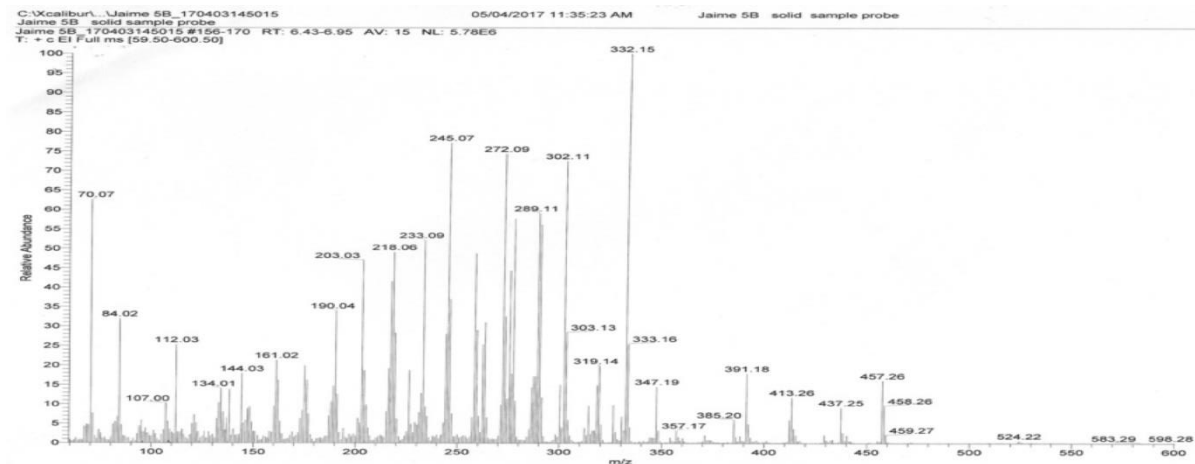

**Figure S68.** 7-(4-((1-(*ter*-buthyl)-1*H*-tetrazol-5-yl)methyl)piperazin-1-yl)-1-ethyl-6-fluoro-4-oxo-1,4-dihydroquinoline-3-carboxylic acid **7**, EI-MS.

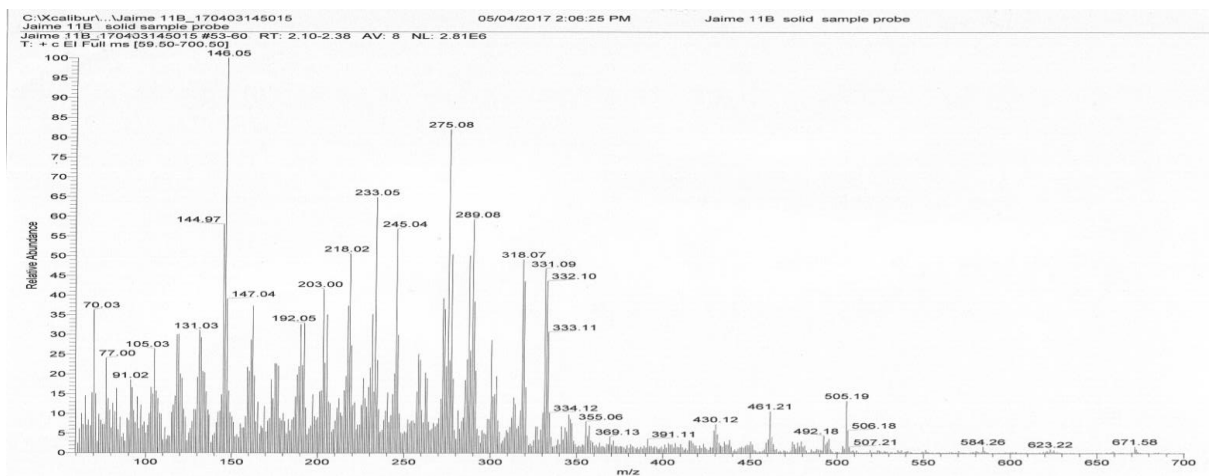

**Figure S69.** 7-(4-((1-(2,6-dimethylphenyl)-1*H*-tetrazol-5-yl)methyl)piperazin-1-yl)-1-ethyl-6-fluoro-4-oxo-1,4-dihydroquinoline-3-carboxylic acid **8**, EI-MS.

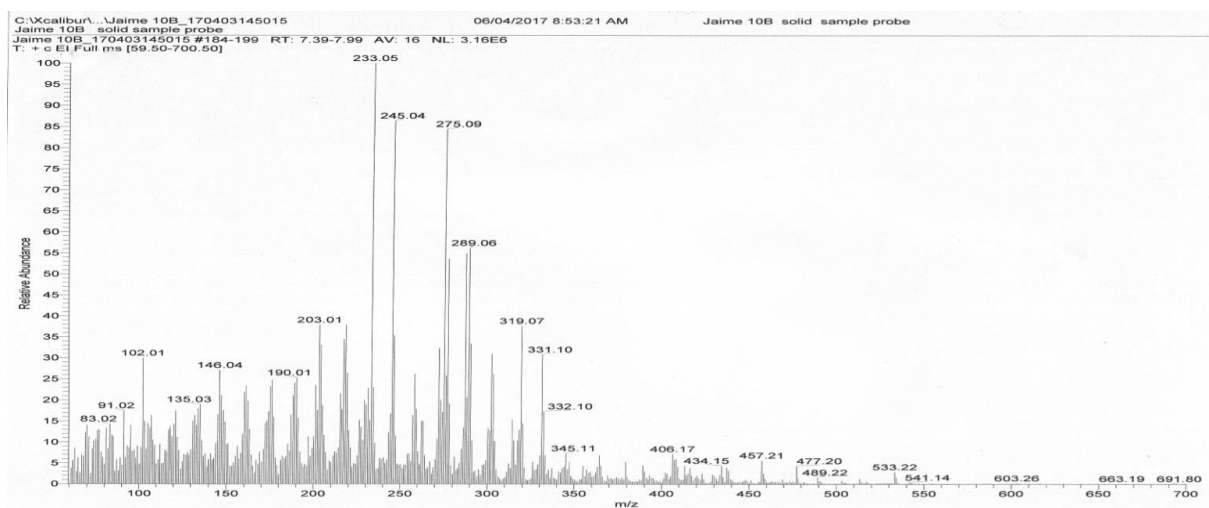

**Figure S70.** (*R/S*)-7-(4-((1-(*ter*-butyl)-1*H*-tetrazol-5-yl)(phenyl)methyl)piperazin-1-yl)-1-ethyl-6-fluoro-4-oxo-1,4-dihydroquinoline-3-carboxylic acid **9, 10**, EI-MS.

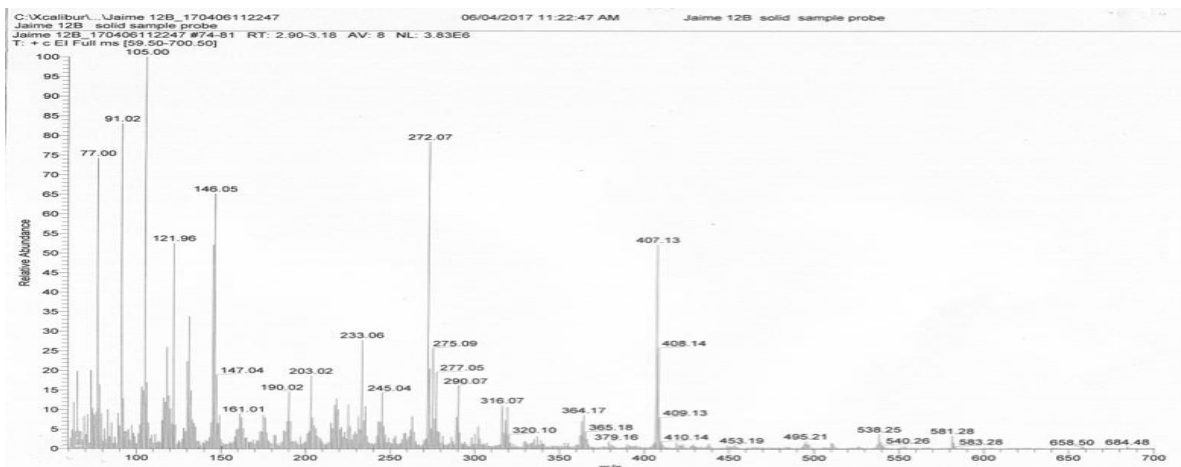

**Figure S71.** (*R/S*)-7-(4-(1-(2,6-dimethylphenyl)-1*H*-tetrazol-5-yl)(phenyl)methyl)piperazin-1-yl)-1-ethyl-6-fluoro-4-oxo-1,4-dihydroquinoline-3-carboxylic acid **11**, **12**, EI-MS.

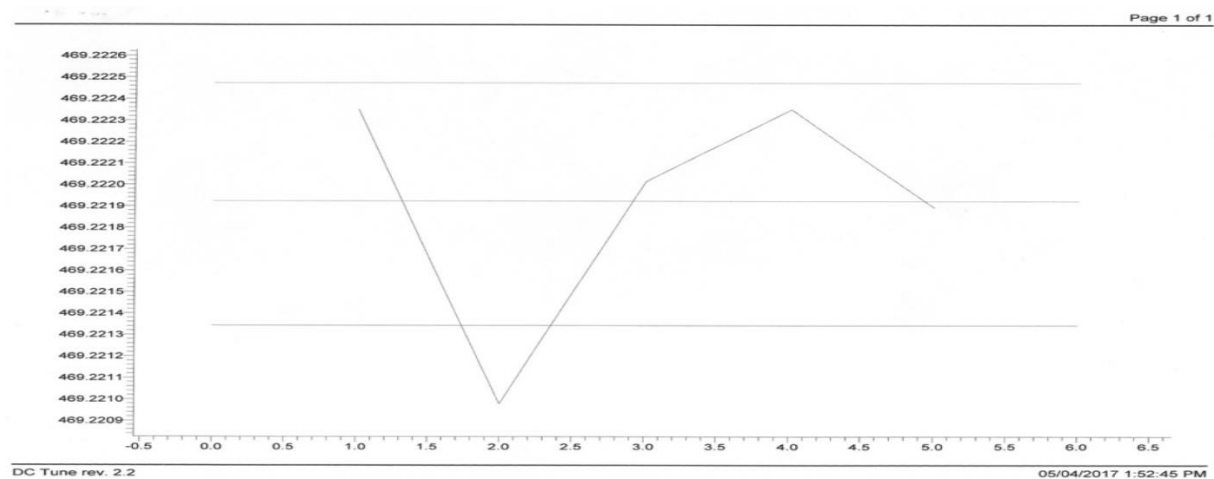

**Figure S72.** 7-(4-((1-(*ter*-buthyl)-1*H*-tetrazol-5-yl)methyl)piperazin-1-yl)-1-cyclopropyl-6-fluoro-4-oxo-1,4-dihydroquinoline-3-carboxylic acid **1**, HR-MS.

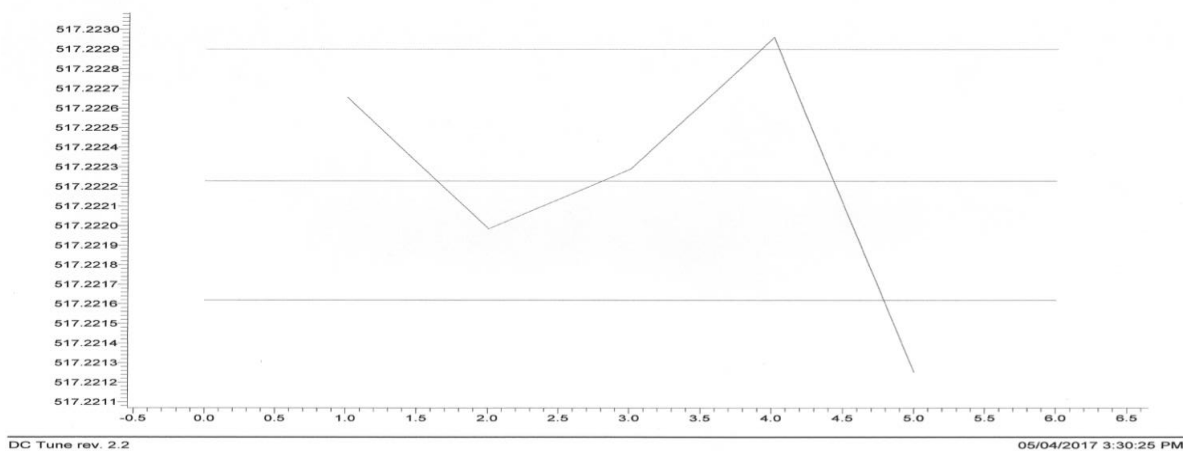

**Figure S73.** 1-cyclopropyl-7-(4-((1-(2,6-dimethylphenyl)-1*H*-tetrazol-5-yl)methyl)piperazin-1-yl)-6-fluoro-4-oxo-1,4-dihydroquinoline-3-carboxylic acid **2**, HR-MS.

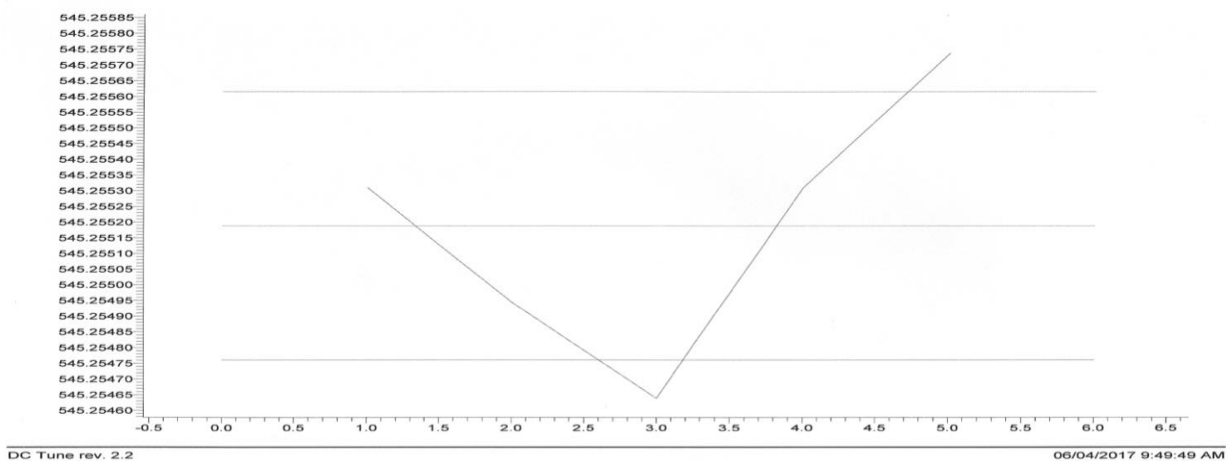

**Figure S74.** (*R/S*)-7-(4-((1-(*ter*-buthyl)-1*H*-tetrazol-5-yl)(phenyl)methyl)piperazin-1-yl)-1-cyclopropyl-6-fluoro-4-oxo-1,4-dihydroquinoline-3-carboxylic acid **3, 4**, HR-MS.

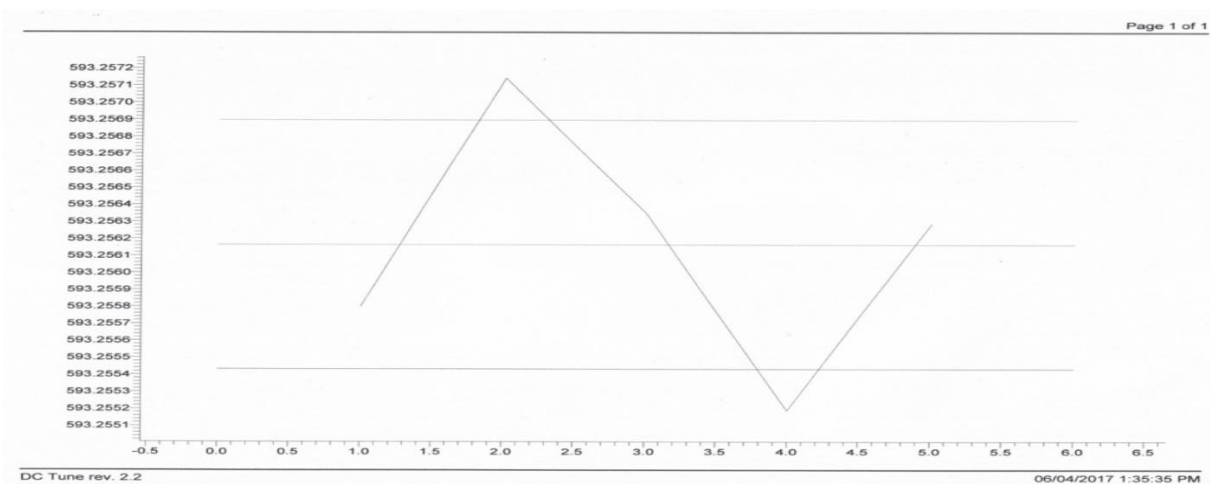

**Figure S75.** (*R/S*)-1-cyclopropyl-7-(4-((1-(2,6-dimethylphenyl)-1*H*-tetrazol-5-yl)(phenyl)methyl)piperazin-1-yl)-6-fluoro-4-oxo-1,4-dihydroquinoline-3-carboxylic acid **5, 6**, HR-MS.

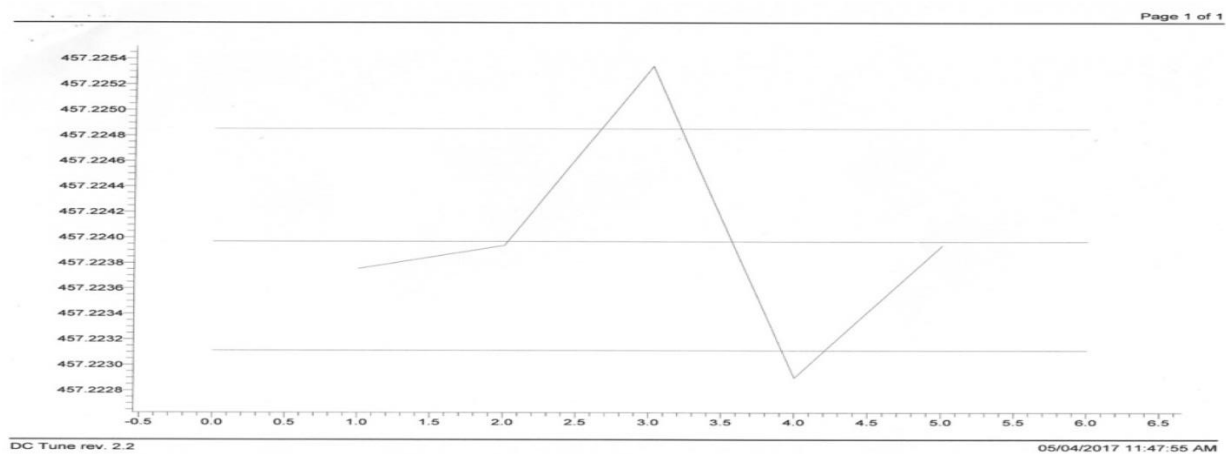

**Figure S76.** 7-(4-((1-(*ter*-buthyl)-1*H*-tetrazol-5-yl)methyl)piperazin-1-yl)-1-ethyl-6-fluoro-4-oxo-1,4-dihydroquinoline-3-carboxylic acid **7**, HR-MS.

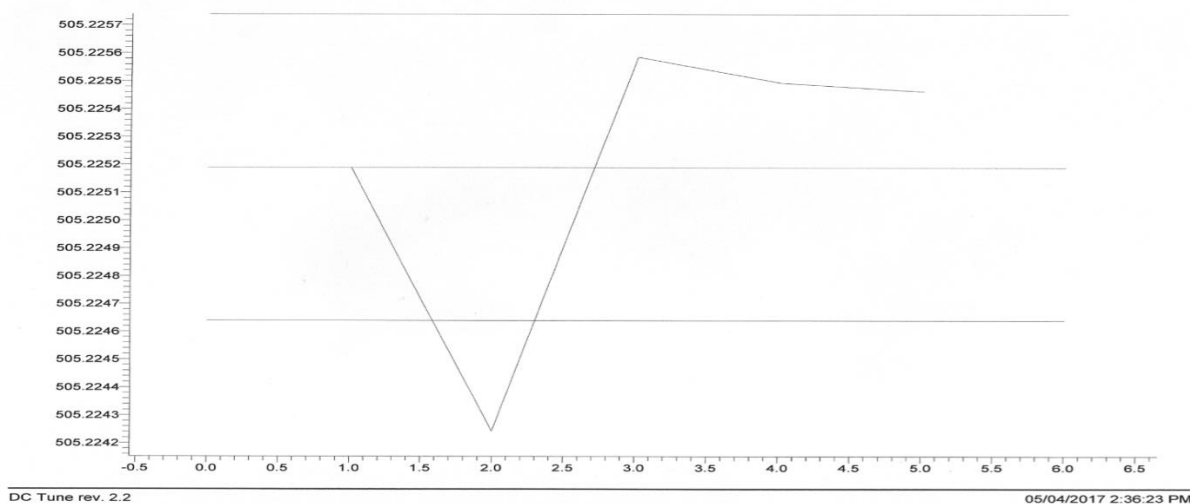

**Figure S77.** 7-(4-((1-(2,6-dimethylphenyl)-1*H*-tetrazol-5-yl)methyl)piperazin-1-yl)-1-ethyl-6-fluoro-4-oxo-1,4-dihydroquinoline-3-carboxylic acid **8**, HR-MS.

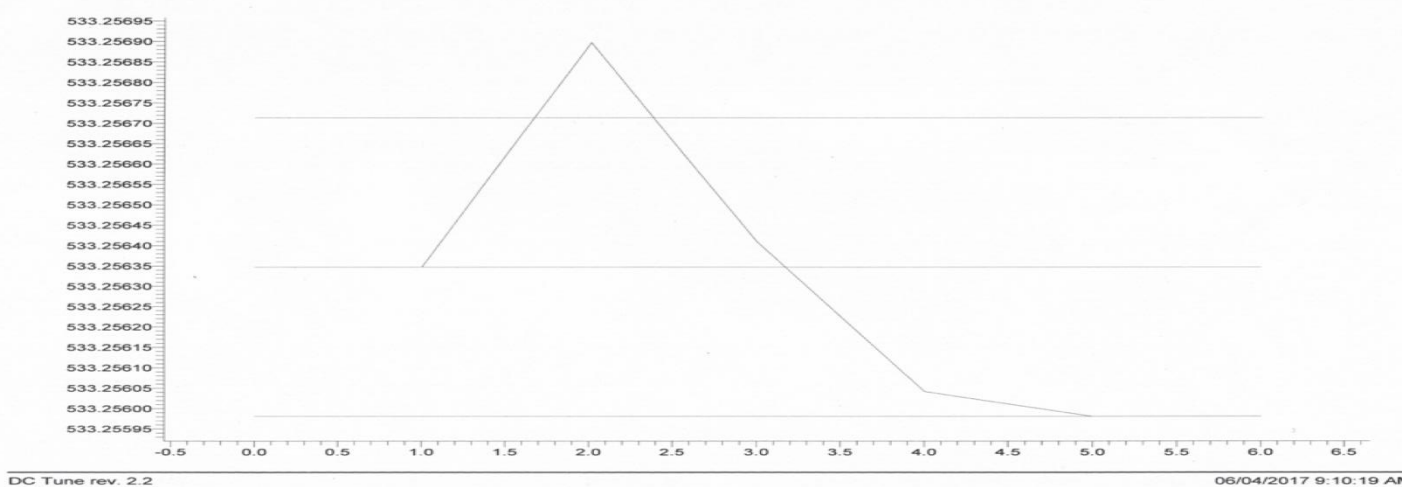

**Figure S78.** (*R/S*)-7-(4-((1-(*ter*-buthyl)-1*H*-tetrazol-5-yl)(phenyl)methyl)piperazin-1-yl)-1-ethyl-6-fluoro-4-oxo-1,4-dihydroquinoline-3-carboxylic acid **9**, **10**, HR-MS.



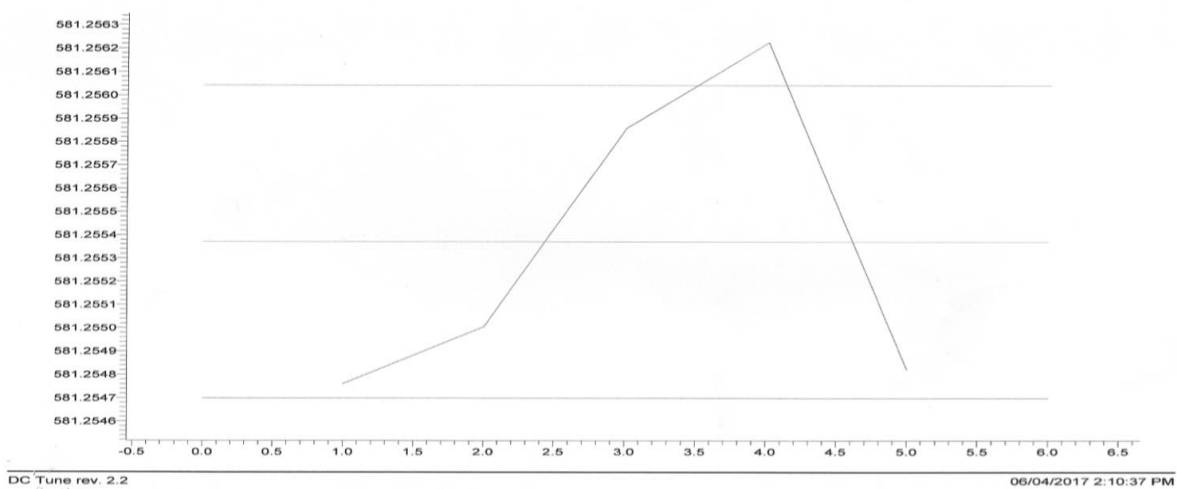

**Figure S79.** (*R/S*)-7-(4-(1-(2,6-dimethylphenyl)-1*H*-tetrazol-5-yl)(phenyl)methyl)piperazin-1-yl)-1-ethyl-6-fluoro-4-oxo-1,4-dihydroquinoline-3-carboxylic acid **11**, **12**, HR-MS.
